# Supplementary material for: Refining Protein Subcellular Localization
Source: PLOS journal article supplement (doi:10.1371/journal.pcbi.0010066), 2005-11-21
Supplement: S4 (10.1371/journal.pcbi.0010066.s004) [file journal.pcbi.0010066.s004]

## Sub-compartmental analysis of the UPR and ERAD pathway components

| Common Name | SGD Systematic Name | Literature derived localization annotation | PSLT2 prediction | Sub-compartmental prediction | GO cellular compartment     | Function                                                                                                                                                                                                                                    |
|-------------|---------------------|--------------------------------------------|------------------|------------------------------|-----------------------------|---------------------------------------------------------------------------------------------------------------------------------------------------------------------------------------------------------------------------------------------|
| Scj1        | YMR214W             | ER lumen                                   | ER               | ER membrane                  | ER lumen                    | One of several homologs of bacterial chaperone DnaJ, located in the ER lumen where it cooperates with Kar2p to mediate maturation of proteins                                                                                               |
| Ssa1        | YAL005C             | ER periphery                               | Cytosol          | cytosolic                    | Nuc; cell wall; cytoplasm   | ATPase; hsp70; complex with Ydj1p                                                                                                                                                                                                           |
| Ydj1        | YNL064C             | ER periphery                               | Cytosol          | cytosolic and nuclear        | Cytosol                     | Protein chaperone involved in regulation of the HSP90 and HSP70 functions; involved in protein translocation across membranes; member of the DnaJ family                                                                                    |
| Kar2        | YJL034W             | ER lumen                                   | ER               | ER lumen                     | ER lumen                    | ATPase involved in protein import into the ER, also acts as a chaperone to mediate protein folding in the ER and may play a role in ER export of soluble proteins; regulates the unfolded protein response via interaction with Ire1p       |
| Hlj1        | YMR161W             | ER membrane                                | ER               | ER membrane                  | ER membrane                 | Co-chaperone for Hsp40p; with its homolog Hdj1p promotes ERAD; similar to DnaJ                                                                                                                                                              |
| Cne1        | YAL058W             | ER membrane                                | ER               | ER membrane                  | int. ER                     | ER chaperone involved in the folding and quality control of glycoproteins                                                                                                                                                                   |
| Jem1        | YJL073W             | ER lumen                                   | ER               | ER lumen                     | around N-ER membrane        | DnaJ-like chaperone required for nuclear membrane fusion during mating                                                                                                                                                                      |
| Lhs1        | YKL073W             | ER lumen                                   | ER               | ER lumen                     | ER lumen                    | Molecular chaperone LERP, involved in polypeptide translocation and folding; member of the Hsp70 family; regulated by UPR                                                                                                                   |
| Npl4        | YBR170C             | nuclear - ER periphery                     | ER               | ER periphery                 | nuclear-ER periphery        | Endoplasmic reticulum and nuclear membrane protein, forms a complex with Cdc48p and Ufd1p that recognizes ubiquitinated proteins in the endoplasmic reticulum and delivers them to the proteasome for degradation                           |
| Cdc48       | YDL126C             | ER periphery                               | ER               | ER periphery                 | Cyt; ER; Nucleus; microsome | participates in retrotranslocation of ubiquitinated proteins from the ER into the cytosol for degradation by the proteasome                                                                                                                 |
| Ufd1        | YGR048W             | ER periphery                               | PM               | plasma membrane periphery    | ER                          | Protein that interacts with Cdc48p and Npl4p, involved in recognition of polyubiquitinated proteins and their presentation to the 26S proteasome for degradation; involved in transporting proteins from the ER to the cytosol              |
| Sec63       | YOR254C             | ER membrane                                | ER               | ER membrane                  | ER membrane                 | Essential subunit of Sec63 complex (Sec63p, Sec62p, Sec66p and Sec72p); with Sec61 complex, Kar2p/BiP and Lhs1p forms a channel competent for SRP-dependent and post-translational SRP-independent protein targeting and import into the ER |
| Ssm4        | YIL030C             | ER periphery                               | ER               | ER membrane                  | int. ER; int Nuc            | Ubiquitin-protein ligase of the ER/nuclear envelope                                                                                                                                                                                         |
| Hrd1        | YOL013C             | ER membrane                                | ER               | ER membrane                  | ER membrane                 | Ubiquitin-protein ligase required for ERAD; genetically linked to UPR; regulated through association with Hrd3p                                                                                                                             |

|           |         |                        |         |                       |                                             |                                                                                                                                                                                                                                                 |
|-----------|---------|------------------------|---------|-----------------------|---------------------------------------------|-------------------------------------------------------------------------------------------------------------------------------------------------------------------------------------------------------------------------------------------------|
| Rpn1      | YHR027C | ER periphery           | ER      | ER periphery          | cyto;nuc;er;proteasome                      | Non-ATPase base subunit of the 19S regulatory particle of the 26S proteasome; may participate in the recognition of several ligands of the proteasome; contains a leucine-rich repeat (LRR) domain, a site for protein-protein interactions     |
| Mn1       | YHR204W | ER lumen               | ER      | ER lumen              | ER                                          |                                                                                                                                                                                                                                                 |
| Cue1      | YMR264W | ER membrane            | Cytosol | mitochondria lumen    | ER membrane; mito.                          | recruits the ubiquitin-conjugating enzyme Ubc7p to the ER where it functions in protein degradation                                                                                                                                             |
| Ubc5      | YDR059C | ER periphery           | Cytosol | cytosolic and nuclear | Proteasome                                  | Ubiquitin-conjugating enzyme that mediates selective degradation of short-lived and abnormal proteins, central component of the cellular stress response; expression is heat inducible                                                          |
| Ubc6      | YER100W | ER membrane            | Cytosol | cytosolic             | ER membrane/Cytosolic                       | Ubiquitin-conjugating enzyme involved in ER-associated protein degradation; located at the cytosolic side of the ER membrane; tail region contains a transmembrane segment at the C-terminus; substrate of the ubiquitin-proteasome pathway     |
| Qri8/Ubc7 | YMR022W | ER periphery           | ER      | ER periphery          | ER periphery                                | Ubiquitin conjugating enzyme, involved in the ER-associated protein degradation pathway; requires Cue1p for recruitment to the ER membrane; proposed to be involved in chromatin assembly                                                       |
| Ptc2      | YER089C | ER periphery           | Cytosol | cytosolic             | Cytosol; Nuclear                            | Type 2C protein phosphatase; dephosphorylates Hog1p to limit maximal osmotic stress induced kinase activity; dephosphorylates Ire1p to downregulate the unfolded protein response; dephosphorylates Cdc28p; role in DNA checkpoint inactivation |
| Hac1      | YFL031W | nuclear - ER periphery | Nuclear | nuclear               | Nuclear                                     | bZIP transcription factor (ATF/CREB1 homolog) that regulates the unfolded protein response, via UPR binding, and membrane biogenesis; ER stress-induced splicing pathway utilizing Ire1p, Trl1p and Ada5p facilitates efficient Hac1p synthesis |
| Ire1      | YHR079C | ER membrane            | ER      | cytosolic and nuclear | ER membrane                                 | Serine-threonine kinase and endoribonuclease; transmembrane protein that initiates the unfolded protein response signal by regulating synthesis of Hac1p through HAC1 mRNA splicing                                                             |
| Orm2      | YLR350W | ER membrane            | ER      | plasma membrane       | ER membrane (tail)                          | Evolutionarily conserved protein with similarity to Orm1p, required for resistance to agents that induce the unfolded protein response; human ortholog is located in the endoplasmic reticulum                                                  |
| Gcn4      | YEL009C | nuclear - ER periphery | Nuclear | nuclear               | Nuclear                                     | Transcriptional activator of amino acid biosynthetic genes in response to amino acid starvation                                                                                                                                                 |
| Spt20     | YOL148C | nuclear                | Nuclear | nuclear               | Nuclear                                     | Subunit of the SAGA transcriptional regulatory complex, involved in maintaining the integrity of the complex                                                                                                                                    |
| Erv46     | YAL042W | ER membrane            | ER      | ER membrane           | ER membrane; golgi membrane; COP-II vesicle | forms a complex with Erv41p; involved in membrane fusion stage of transport                                                                                                                                                                     |

|           |         |                        |         |                     |                        |                                                                                                                                                                                                                                            |
|-----------|---------|------------------------|---------|---------------------|------------------------|--------------------------------------------------------------------------------------------------------------------------------------------------------------------------------------------------------------------------------------------|
| Pdi1      | YCL043C | ER lumen               | ER      | ER lumen            | ER lumen               | multifunctional protein resident in the endoplasmic reticulum lumen, essential for the formation of disulfide bonds in secretory and cell-surface proteins, unscrambles non-native disulfide bonds                                         |
| Rlg1/Trl1 | YJL087C | nuclear - ER periphery | Cytosol | cytosol and nuclear | Nuclear inner membrane | tRNA ligase, required for tRNA splicing; composed of three essential domains containing the phosphodiesterase, polynucleotide kinase, and ligase activities required for ligation; localized at the inner membrane of the nuclear envelope |
