# Supplementary material for: Refining Protein Subcellular Localization
Source: PLoS Comput Biol. 2005 Nov 25;1(6):e66. doi: 10.1371/journal.pcbi.0010066 (PMC1289393; doi:10.1371/journal.pcbi.0010066)
Supplement: Table S1 — (511 KB XLS) [file pcbi.0010066.st001.xls]

## Sheet: PSLT2predictionsAll
PSLT2 predictions
SGD Systematic name	Most likely localization	Second most likely localization	Uninformative
YLR027C	Cytosol	Peroxisome	FALSE
YNR016C	Cytosol		FALSE
YPL124W	Nucleus		FALSE
YPL125W	Cytosol	Nucleus	FALSE
YAL054C	Cytosol	Nucleus	FALSE
YCR011C	ER		FALSE
YLR397C	Cytosol	Mitochondrion	FALSE
YBR132C	Plasma membrane		FALSE
YLR109W	Cytosol		FALSE
YBR110W	ER	Golgi	TRUE
YNL048W	Cytosol	ER	TRUE
YGL065C	Plasma membrane	ER	TRUE
YPL227C	ER		FALSE
YOR002W	ER		FALSE
YBR243C	ER		FALSE
YOR067C	ER		FALSE
YNL219C	ER		FALSE
YOL130W	Mitochondrion	Plasma membrane	FALSE
YGL156W	Lysosome		FALSE
YEL036C	Golgi	ER	FALSE
YPR128C	Mitochondrion		FALSE
YBR286W	Lysosome		FALSE
YGL180W	Cytosol	Nucleus	FALSE
YBR217W	Cytosol		FALSE
YBR128C	Nucleus	Cytosol	TRUE
YMR159C	Cytosol		FALSE
YNL242W	Nucleus	Cytosol	TRUE
YPL149W	Nucleus	Cytosol	TRUE
YDL149W	Plasma membrane	ER	TRUE
YJR005W	Cytosol		FALSE
YKL135C	Cytosol		FALSE
YPR029C	Cytosol		FALSE
YPL195W	Cytosol		FALSE
YPL259C	Cytosol		FALSE
YHL019C	Cytosol		FALSE
YLR170C	Cytosol		FALSE
YLL052C	Plasma membrane	Mitochondrion	TRUE
YCR048W	ER		FALSE
YNR019W	ER		FALSE
YDL192W	Golgi		FALSE
YDL137W	Golgi	ER	FALSE
YOR094W	Cytosol		FALSE
YHL040C	Plasma membrane		FALSE
YHL047C	Plasma membrane		FALSE
YMR119W	Plasma membrane	ER	TRUE
YNL008C	Plasma membrane	ER	TRUE
YLR155C	Secreted		FALSE
YPR026W	Cytosol		FALSE
YOR079C	Golgi		FALSE
YKL004W	ER	Golgi	FALSE
YFR021W	Nucleus		FALSE
YCL038C	Plasma membrane	ER	TRUE
YBL078C	Lysosome	Cytosol	FALSE
YIL124W	Peroxisome		FALSE
YIL004C	Golgi		FALSE
YKR068C	Golgi		FALSE
YML077W	Golgi		FALSE
YGR282C	Nucleus	Cytosol	FALSE
YBL098W	Secreted	ER	TRUE
YLR078C	Golgi		FALSE
YBR290W	Plasma membrane	ER	TRUE
YFL025C	Mitochondrion		FALSE
YML042W	Peroxisome		FALSE
YGR036C	ER	Lysosome	FALSE
YLR220W	Plasma membrane	ER	TRUE
YDR270W	Cytosol		FALSE
YLR390W-A	Plasma membrane		TRUE
YBR131W	Cytosol	Golgi	FALSE
YLR229C	Plasma membrane	Cytosol	FALSE
YDL126C	ER	Cytosol	FALSE
YBR029C	Plasma membrane	ER	TRUE
YGL206C	Cytosol		FALSE
YER026C	Mitochondrion		FALSE
YGR157W	Plasma membrane	ER	TRUE
YHR142W	Plasma membrane	ER	TRUE
YJL158C	Secreted	Plasma membrane	FALSE
YCR005C	Peroxisome	Mitochondrion	FALSE
YGR167W	Cytosol		FALSE
YAL058W	ER		FALSE
YGL223C	Cytosol	Golgi	FALSE
YGR120C	Golgi		FALSE
YER157W	Golgi		FALSE
YPR105C	Cytosol	Golgi	FALSE
YNL051W	Nucleus	Cytosol	TRUE
YNL041C	Golgi		FALSE
YGL005C	Nucleus	Cytosol	TRUE
YML071C	Nucleus	Cytosol	TRUE
YDL145C	Golgi		FALSE
YNR075W	ER		FALSE
YOR316C	ER		FALSE
YHR057C	Secreted		FALSE
YCR069W	Secreted		FALSE
YDR304C	Secreted		FALSE
YJL172W	Lysosome		FALSE
YNL130C	Cytosol	Mitochondrion	FALSE
YBR036C	Plasma membrane	Mitochondrion	FALSE
YLR380W	Cytosol	Golgi	FALSE
YDR256C	Cytosol	Peroxisome	FALSE
YHR175W	Plasma membrane		FALSE
YLR286C	Secreted		FALSE
YMR264W	Mitochondrion	Cytosol	FALSE
YEL027W	Lysosome		FALSE
YCR068W	Golgi	ER	FALSE
YDL113C	Peroxisome		FALSE
YPR049C	Nucleus	Cytosol	TRUE
YGL027C	ER		FALSE
YOR065W	Mitochondrion		FALSE
YIR031C	Cytosol	Peroxisome	FALSE
YHR028C	Lysosome		FALSE
YOR180C	Cytosol	Peroxisome	FALSE
YOR204W	Nucleus		FALSE
YBR201W	ER		FALSE
YKR035W-A	Nucleus		FALSE
YGR227W	Plasma membrane	ER	TRUE
YMR162C	Plasma membrane		FALSE
YDR069C	Cytosol	ER	FALSE
YPR183W	ER	Cytosol	FALSE
YDR284C	Lysosome		FALSE
YAL026C	Golgi		FALSE
YNL258C	Cytosol	Golgi	FALSE
YPR017C	Cytosol		FALSE
YLR284C	Nucleus	Cytosol	TRUE
YLR390W	Cytosol	ER	TRUE
YBR078W	Plasma membrane		FALSE
YBL047C	Nucleus	Cytosol	FALSE
YGL200C	ER		FALSE
YLR080W	Golgi		FALSE
YFL048C	Golgi		FALSE
YLR083C	ER	Mitochondrion	TRUE
YIL005W	Golgi		FALSE
YHR123W	Mitochondrion		FALSE
YDR414C	ER		FALSE
YBL040C	ER		FALSE
YLR246W	Mitochondrion		TRUE
YGR175C	Nucleus	Cytosol	TRUE
YHR007C	Plasma membrane	Mitochondrion	TRUE
YML126C	Nucleus	Cytosol	TRUE
YMR202W	ER		FALSE
YNL280C	ER	Mitochondrion	TRUE
YGR060W	ER		FALSE
YGL001C	ER		FALSE
YLR100W	ER	Nucleus	FALSE
YER044C	Plasma membrane	Mitochondrion	TRUE
YLR056W	ER		FALSE
YGL012W	Plasma membrane	ER	TRUE
YMR015C	Nucleus	Cytosol	TRUE
YML008C	Cytosol	Nucleus	FALSE
YHR072W	Nucleus	Cytosol	TRUE
YHR190W	ER		FALSE
YML130C	ER		FALSE
YAR002C-A	ER		FALSE
YAL007C	ER		FALSE
YDL018C	ER		FALSE
YOR016C	ER		FALSE
YHR110W	ER		FALSE
YGL002W	ER		FALSE
YCR075C	ER		FALSE
YGL054C	Golgi	ER	FALSE
YPR037C	ER		FALSE
YML012W	ER		FALSE
YGR284C	ER		FALSE
YML067C	ER		FALSE
YAL042W	ER		FALSE
YDR518W	ER		FALSE
YLR300W	Secreted		FALSE
YBR102C	Cytosol		FALSE
YER015W	Cytosol	Nucleus	FALSE
YFR019W	Cytosol		FALSE
YBR041W	Mitochondrion		FALSE
YBR222C	Peroxisome		FALSE
YCR034W	Plasma membrane	ER	TRUE
YFL041W	Secreted		FALSE
YKR009C	Peroxisome		FALSE
YDR519W	Secreted		FALSE
YBR207W	Lysosome		FALSE
YLR088W	ER		FALSE
YBR020W	Cytosol		FALSE
YMR307W	Plasma membrane		FALSE
YEL042W	Golgi		FALSE
YJR031C	Cytosol	Golgi	FALSE
YEL022W	Cytosol		FALSE
YJR040W	Nucleus		FALSE
YDR358W	Nucleus	Cytosol	TRUE
YHR108W	Nucleus		FALSE
YOR320C	ER	Golgi	TRUE
YMR292W	ER	Nucleus	TRUE
YDL022W	Mitochondrion		FALSE
YGR216C	Plasma membrane	ER	TRUE
YGL142C	ER		FALSE
YDR302W	Plasma membrane	ER	TRUE
YMR281W	ER	Golgi	TRUE
YLL031C	ER	Mitochondrion	TRUE
YHR188C	ER		FALSE
YDR434W	ER		TRUE
YPL076W	Plasma membrane	ER	TRUE
YDR331W	ER		FALSE
YKR067W	Golgi	ER	FALSE
YOR357C	Cytosol		FALSE
YDR517W	Nucleus	Cytosol	TRUE
YML048W	Cytosol	ER	TRUE
YDR108W	Nucleus	Cytosol	TRUE
YIR038C	ER	Cytosol	FALSE
YLL060C	Cytosol		FALSE
YOR070C	Golgi		FALSE
YML075C	ER		FALSE
YLR450W	ER		FALSE
YJR075W	Golgi	ER	FALSE
YMR251W-A	ER		FALSE
YOL013C	Lysosome	ER	FALSE
YLR207W	ER		FALSE
YOR311C	Plasma membrane	ER	TRUE
YPL244C	ER	Mitochondrion	TRUE
YDR342C	Plasma membrane		FALSE
YNL009W	Cytosol		FALSE
YLR309C	Cytosol	Golgi	FALSE
YOL065C	Nucleus	Cytosol	FALSE
YHR079C	ER		FALSE
YJL073W	ER		FALSE
YJL034W	ER		FALSE
YMR065W	Lysosome		FALSE
YGL203C	Mitochondrion		FALSE
YNL238W	Golgi		FALSE
YGR166W	Cytosol	Golgi	FALSE
YDR483W	Golgi		FALSE
YOR336W	ER		FALSE
YPR159W	Golgi		FALSE
YOR099W	Golgi		FALSE
YKR061W	Golgi		FALSE
YBR199W	Golgi		FALSE
YNL029C	Golgi		FALSE
YIL085C	Golgi		FALSE
YKL008C	Plasma membrane	ER	TRUE
YHL003C	Plasma membrane	ER	TRUE
YKL103C	Lysosome		FALSE
YJL062W	Plasma membrane	ER	FALSE
YMR296C	Cytosol	Mitochondrion	FALSE
YDR062W	Cytosol		FALSE
YJL134W	Mitochondrion		FALSE
YKL073W	ER		FALSE
YNR008W	Golgi	ER	FALSE
YDR027C	Cytosol	Golgi	FALSE
YIR034C	Cytosol	Peroxisome	FALSE
YDR234W	Mitochondrion		FALSE
YKL165C	ER		FALSE
YOL119C	Plasma membrane		FALSE
YOL126C	Cytosol	Mitochondrion	FALSE
YDL078C	Peroxisome	Nucleus	FALSE
YNL117W	Cytosol	Peroxisome	FALSE
YHR204W	ER		FALSE
YER001W	ER	Golgi	TRUE
YDR245W	Golgi		FALSE
YJL183W	Golgi		FALSE
YBR015C	ER	Golgi	TRUE
YJL186W	ER	Golgi	TRUE
YPL050C	Golgi		FALSE
YJR131W	ER		FALSE
YOR288C	ER		FALSE
YOL088C	ER	Golgi	FALSE
YPR079W	ER		TRUE
YDR205W	ER		FALSE
YNR049C	Nucleus	Cytosol	TRUE
YMR004W	Cytosol		FALSE
YPR149W	ER	Nucleus	TRUE
YHR042W	ER		FALSE
YHR004C	Nucleus		FALSE
YDR456W	Mitochondrion		FALSE
YBR170C	Cytosol	ER	FALSE
YGL067W	Mitochondrion		FALSE
YJL041W	Cytosol	Nucleus	FALSE
YKL057C	Nucleus	Cytosol	FALSE
YIL115C	Nucleus	Cytosol	FALSE
YMR153W	Cytosol	Nucleus	FALSE
YGR119C	Cytosol		FALSE
YHR195W	ER		FALSE
YLR093C	ER		FALSE
YGL038C	Golgi	ER	FALSE
YGL055W	ER		FALSE
YJR073C	Nucleus	Cytosol	TRUE
YLR350W	Plasma membrane	ER	TRUE
YAR044W	Golgi		FALSE
YJL002C	ER		FALSE
YOR103C	ER		FALSE
YOR085W	ER		FALSE
YDL232W	ER		FALSE
YGL226C-A	Nucleus	ER	FALSE
YML019W	ER		FALSE
YCL052C	ER		FALSE
YLR151C	Cytosol		FALSE
YGR202C	Nucleus		FALSE
YCL043C	ER		FALSE
YBL017C	Golgi		FALSE
YOR036W	Golgi		FALSE
YLR148W	Lysosome	Cytosol	FALSE
YPL154C	Lysosome	Plasma membrane	FALSE
YMR231W	Lysosome		FALSE
YJL053W	Cytosol		FALSE
YCR044C	ER	Mitochondrion	TRUE
YBL030C	Mitochondrion		FALSE
YKL197C	Cytosol		FALSE
YOL147C	Peroxisome		FALSE
YMR026C	Peroxisome		FALSE
YLR191W	Peroxisome		FALSE
YGL153W	Peroxisome		FALSE
YOL044W	Peroxisome		FALSE
YNL214W	Peroxisome		FALSE
YJL210W	Peroxisome		FALSE
YDR329C	Peroxisome		FALSE
YGR133W	Peroxisome		FALSE
YDR244W	Peroxisome		FALSE
YNL329C	Mitochondrion	Nucleus	FALSE
YDR142C	Cytosol		FALSE
YGR077C	Peroxisome		FALSE
YCL004W	Mitochondrion		FALSE
YDR481C	Lysosome		FALSE
YJL117W	Plasma membrane	Mitochondrion	TRUE
YDR313C	Cytosol	Nucleus	FALSE
YNL267W	Cytosol	Nucleus	FALSE
YPR113W	Mitochondrion		FALSE
YGL008C	Plasma membrane		FALSE
YGL006W	Plasma membrane	Lysosome	FALSE
YGL167C	Plasma membrane		FALSE
YDL095W	ER		FALSE
YAL023C	ER		FALSE
YOR321W	ER		FALSE
YJR143C	ER		FALSE
YDL093W	ER		FALSE
YGR199W	ER		FALSE
YNL055C	Mitochondrion		FALSE
YIL160C	Cytosol	Peroxisome	FALSE
YGL205W	Peroxisome		FALSE
YHR026W	Lysosome		FALSE
YDR452W	Cytosol		FALSE
YEL060C	Lysosome		FALSE
YMR297W	Lysosome		FALSE
YER012W	Cytosol	ER	FALSE
YOR362C	Cytosol	ER	FALSE
YPR103W	Cytosol	ER	FALSE
YJL001W	Cytosol	ER	FALSE
YFR050C	Cytosol	ER	FALSE
YMR314W	Cytosol	ER	FALSE
YOL038W	Cytosol	ER	FALSE
YBL041W	Cytosol	ER	FALSE
YML092C	Cytosol	ER	FALSE
YGR135W	Cytosol	ER	FALSE
YNL279W	Nucleus	Cytosol	TRUE
YJL079C	Secreted	ER	TRUE
YGR170W	Golgi	Lysosome	FALSE
YAL043C	Nucleus		FALSE
YOR157C	Cytosol	ER	FALSE
YGR253C	Cytosol	ER	FALSE
YER094C	Cytosol	ER	FALSE
YPL147W	Peroxisome		FALSE
YKL188C	Peroxisome		FALSE
YMR022W	ER		FALSE
YMR274C	ER		FALSE
YCL001W	Golgi		FALSE
YBR002C	Cytosol		FALSE
YFR051C	Golgi		FALSE
YPL010W	Golgi		FALSE
YDR137W	Nucleus	Cytosol	TRUE
YPR165W	Cytosol		FALSE
YNL090W	Mitochondrion		FALSE
YLR039C	Nucleus	Cytosol	TRUE
YBR229C	Secreted	ER	TRUE
YHR027C	ER	Cytosol	FALSE
YHR200W	Cytosol	ER	FALSE
YFR004W	ER	Cytosol	FALSE
YFR052W	Cytosol		FALSE
YIL075C	Nucleus	Cytosol	FALSE
YER021W	ER	Cytosol	FALSE
YDL020C	Nucleus		FALSE
YDL147W	Cytosol	ER	FALSE
YDL097C	ER	Cytosol	FALSE
YPR108W	ER	Cytosol	FALSE
YOR261C	ER		FALSE
YDR427W	ER	Cytosol	FALSE
YKL145W	ER	Cytosol	FALSE
YDL007W	ER	Cytosol	FALSE
YDR394W	ER	Cytosol	FALSE
YOR259C	ER	Cytosol	FALSE
YOR117W	ER	Cytosol	FALSE
YGL048C	ER	Cytosol	FALSE
YOR049C	Nucleus		FALSE
YER125W	Cytosol		FALSE
YOR216C	Cytosol		FALSE
YKL212W	Plasma membrane	Mitochondrion	TRUE
YDR484W	Nucleus	Cytosol	TRUE
YPL218W	Golgi	Cytosol	FALSE
YDR351W	Nucleus	Cytosol	TRUE
YER087C-B	ER	Lysosome	TRUE
YER019C-A	Mitochondrion		TRUE
YMR214W	ER		FALSE
YGL011C	Cytosol	ER	FALSE
YJL080C	Nucleus	Cytosol	FALSE
YER120W	ER		FALSE
YMR272C	ER	Plasma membrane	FALSE
YMR305C	Secreted	ER	TRUE
YDR164C	Cytosol	Golgi	FALSE
YIR022W	ER	Mitochondrion	FALSE
YNR026C	Golgi		FALSE
YLR208W	Cytosol		FALSE
YMR079W	Cytosol	Golgi	FALSE
YPL085W	Cytosol	ER	FALSE
YBL050W	Golgi		FALSE
YBR080C	Golgi		FALSE
YDR498C	ER	Nucleus	FALSE
YNL287W	Golgi	Cytosol	FALSE
YLR268W	Golgi		FALSE
YPR181C	Golgi		FALSE
YIL109C	ER	Golgi	FALSE
YDR238C	Golgi		FALSE
YGL137W	Golgi		FALSE
YIL076W	Golgi		FALSE
YDL195W	ER	Golgi	FALSE
YFL005W	Cytosol		FALSE
YFL045C	Cytosol		FALSE
YMR013C	Plasma membrane	ER	TRUE
YLR378C	ER		FALSE
YPL094C	ER		FALSE
YOR254C	ER		FALSE
YML105C	Nucleus	ER	FALSE
YBR171W	ER	Lysosome	FALSE
YDR170C	Golgi		FALSE
YLR292C	ER	Cytosol	FALSE
YCR067C	Nucleus	Cytosol	FALSE
YLR026C	Golgi		FALSE
YDR363W-A	Nucleus	Cytosol	TRUE
YHR098C	Cytosol	Golgi	FALSE
YKL006C-A	Golgi		FALSE
YBL102W	Nucleus	Cytosol	TRUE
YJR134C	Cytosol	Nucleus	FALSE
YER118C	Cytosol		FALSE
YDL212W	ER	Nucleus	TRUE
YIL123W	Mitochondrion		FALSE
YDR422C	Plasma membrane	Nucleus	FALSE
YEL065W	Plasma membrane		FALSE
YGR143W	Golgi		FALSE
YDL052C	ER		FALSE
YDR189W	Golgi		FALSE
YOL122C	Mitochondrion		FALSE
YHR050W	Mitochondrion		FALSE
YLR034C	Mitochondrion		FALSE
YOR327C	Golgi		FALSE
YDR477W	Nucleus	Cytosol	FALSE
YLR025W	Nucleus		FALSE
YIL016W	ER		FALSE
YJL036W	Cytosol		FALSE
YJR010C-A	ER		FALSE
YML055W	Plasma membrane	Mitochondrion	TRUE
YLR066W	Nucleus	Cytosol	TRUE
YEL031W	Lysosome		FALSE
YKR031C	Cytosol		FALSE
YAL009W	Cytosol	Nucleus	FALSE
YNL202W	Peroxisome	Cytosol	FALSE
YPL175W	Nucleus	Cytosol	TRUE
YDR292C	Cytosol	ER	FALSE
YKL154W	ER		FALSE
YDL092W	Nucleus	ER	FALSE
YKL122C	Nucleus	ER	FALSE
YPR088C	Cytosol		FALSE
YPL243W	Nucleus	ER	FALSE
YPL210C	ER	Nucleus	FALSE
YDL229W	Cytosol		FALSE
YBR283C	ER		FALSE
YIL030C	ER		FALSE
YMR183C	Golgi		FALSE
YDR086C	ER		FALSE
YHR064C	Cytosol		FALSE
YOR219C	Lysosome		FALSE
YDR410C	ER	Mitochondrion	TRUE
YJR117W	ER		FALSE
YKL209C	ER		FALSE
YLR375W	Nucleus		FALSE
YGL184C	Nucleus	Cytosol	FALSE
YGL022W	ER		FALSE
YDR297W	Mitochondrion		FALSE
YLR372W	Plasma membrane	ER	TRUE
YDR320C	Cytosol		FALSE
YMR149W	ER		FALSE
YJL004C	Nucleus	Plasma membrane	TRUE
YPR080W	Cytosol		FALSE
YJR019C	Peroxisome		FALSE
YGL145W	Cytosol		FALSE
YLR136C	Nucleus	Cytosol	TRUE
YDR468C	Golgi		FALSE
YOL018C	Golgi		FALSE
YMR203W	Mitochondrion		FALSE
YJR066W	Nucleus	Cytosol	FALSE
YKL203C	Cytosol		FALSE
YLL028W	Plasma membrane	ER	TRUE
YGR138C	Plasma membrane		FALSE
YPR156C	Plasma membrane		FALSE
YOR273C	Plasma membrane		FALSE
YDR407C	Cytosol	Golgi	FALSE
YMR218C	Cytosol	Golgi	FALSE
YBR254C	Golgi		FALSE
YDR246W	Golgi		FALSE
YDR472W	Golgi		FALSE
YOR115C	Golgi		FALSE
YLR043C	Nucleus	Cytosol	FALSE
YGR209C	Nucleus	Cytosol	FALSE
YBR265W	Peroxisome		FALSE
YDL015C	Plasma membrane	ER	TRUE
YER100W	Cytosol		FALSE
YGR048W	Plasma membrane		FALSE
YOR075W	Cytosol	Nucleus	FALSE
YDL058W	Cytosol		FALSE
YDR449C	Nucleus	Cytosol	FALSE
YNL054W	Cytosol	ER	TRUE
YEL013W	Cytosol		FALSE
YOR106W	Lysosome		FALSE
YDL077C	Cytosol		FALSE
YGL212W	Lysosome		FALSE
YML115C	Golgi		FALSE
YDL128W	ER	Lysosome	TRUE
YLR373C	Nucleus	Cytosol	TRUE
YBR105C	Nucleus	Cytosol	FALSE
YHR039C-A	Cytosol		FALSE
YPR036W	Lysosome	Cytosol	FALSE
YBR127C	Cytosol		FALSE
YGR105W	ER		TRUE
YHR060W	ER	Cytosol	FALSE
YOR332W	Nucleus		FALSE
YKL080W	Cytosol		FALSE
YLR447C	Nucleus		FALSE
YGR020C	Cytosol		FALSE
YEL051W	Cytosol		FALSE
YOR270C	Lysosome	ER	FALSE
YKL119C	ER		FALSE
YKR001C	Cytosol		FALSE
YBR097W	Golgi		FALSE
YPL045W	Cytosol		FALSE
YOR132W	Cytosol		FALSE
YOR089C	Plasma membrane	Cytosol	FALSE
YKL041W	Nucleus		FALSE
YNR006W	Cytosol		FALSE
YHR012W	Cytosol		FALSE
YPL120W	Nucleus		FALSE
YLR396C	Golgi	Cytosol	FALSE
YLR240W	Golgi		FALSE
YLR360W	Mitochondrion		TRUE
YPR173C	Cytosol	Nucleus	FALSE
YDR080W	Lysosome	Golgi	FALSE
YGL095C	Golgi		FALSE
YOR069W	Golgi		FALSE
YJL029C	Nucleus		FALSE
YDR486C	Nucleus		FALSE
YGL225W	Golgi		FALSE
YMR197C	Golgi		FALSE
YEL002C	ER		FALSE
YHL028W	ER	Golgi	TRUE
YBL071C	Cytosol	Peroxisome	FALSE
YBL100C	Mitochondrion		TRUE
YBR012C	Cytosol	Peroxisome	FALSE
YLL048C	ER		FALSE
YDR135C	ER		FALSE
YHR135C	Cytosol		FALSE
YER123W	Cytosol		FALSE
YPL087W	ER		FALSE
YNL064C	Cytosol	Nucleus	FALSE
YDL072C	ER	Mitochondrion	TRUE
YDL121C	ER	Golgi	TRUE
YDL193W	ER		FALSE
YDR107C	Mitochondrion		FALSE
YDR274C	Nucleus	Cytosol	TRUE
YEL004W	Golgi		FALSE
YEL020C	Cytosol	Nucleus	FALSE
YEL064C	Lysosome		FALSE
YEL076C	Nucleus	Cytosol	TRUE
YER053C	Mitochondrion		FALSE
YER113C	ER	Nucleus	TRUE
YER119C	Lysosome		FALSE
YKL065C	ER	Mitochondrion	TRUE
YGR089W	ER	Mitochondrion	TRUE
YGR154C	Cytosol	Peroxisome	FALSE
YJL059W	Lysosome		FALSE
YMR241W	Mitochondrion		FALSE
YHR105W	Cytosol		FALSE
YHR176W	Cytosol		FALSE
YNL263C	Plasma membrane		FALSE
YIL088C	Lysosome		FALSE
YGR172C	Plasma membrane	ER	TRUE
YNL044W	Plasma membrane	Mitochondrion	TRUE
YJR001W	Lysosome		FALSE
YKL196C	Golgi		FALSE
YLL034C	Cytosol	Nucleus	FALSE
YMR259C	Cytosol	Nucleus	FALSE
YER005W	Golgi		FALSE
YNL101W	Lysosome		FALSE
YNL194C	ER	Nucleus	TRUE
YOL031C	ER		FALSE
YPR028W	ER	Mitochondrion	TRUE
YOR088W	ER	Mitochondrion	TRUE
YDR057W	ER		FALSE
YBR183W	ER		FALSE
YFL038C	Golgi	Cytosol	FALSE
YER031C	Cytosol		FALSE
YGL210W	Cytosol		FALSE
YLR262C	Cytosol		FALSE
YML001W	Cytosol	Lysosome	FALSE
YKR053C	ER	Lysosome	FALSE
YGR270W	Cytosol	Nucleus	FALSE
YJL139C	Golgi		FALSE
YOR087W	Nucleus	Cytosol	TRUE
YJR127C	Nucleus	Cytosol	FALSE
YMR243C	ER		FALSE
YKL175W	Golgi		FALSE
YKL157W	Mitochondrion		FALSE
YHR101C	ER	Golgi	TRUE
YAL030W	Golgi		FALSE
YAR071W	Secreted		FALSE
YAL035W	Cytosol	Nucleus	FALSE
YAL032C	Nucleus		FALSE
YBL008W	Nucleus		FALSE
YAR035W	Peroxisome	Mitochondrion	FALSE
YBL015W	Cytosol		FALSE
YAL005C	Cytosol		FALSE
YBL013W	Mitochondrion		TRUE
YAL016W	Cytosol	Golgi	FALSE
YAL024C	Nucleus	Cytosol	TRUE
YBL005W	Nucleus		FALSE
YBL016W	Cytosol	Nucleus	FALSE
YAL025C	Nucleus		FALSE
YAR014C	Cytosol		FALSE
YAR050W	Plasma membrane		FALSE
YAL038W	Nucleus	Cytosol	TRUE
YAL039C	Mitochondrion		FALSE
YAL040C	Nucleus		FALSE
YAL041W	Nucleus	Plasma membrane	FALSE
YAL044C	Mitochondrion		FALSE
YAL051W	Nucleus		FALSE
YAL062W	Nucleus	Cytosol	TRUE
YAR002W	Nucleus		FALSE
YAL010C	Nucleus	Cytosol	TRUE
YAL015C	Nucleus		FALSE
YBL019W	Nucleus		FALSE
YBL022C	Mitochondrion		FALSE
YBL023C	Nucleus	Cytosol	FALSE
YBL024W	Nucleus		FALSE
YBL027W	Nucleus	Cytosol	TRUE
YBL038W	Mitochondrion		FALSE
YBL039C	Mitochondrion	Cytosol	FALSE
YBL042C	Plasma membrane		FALSE
YBL064C	Cytosol		FALSE
YBL072C	Nucleus	Cytosol	TRUE
YBL075C	Cytosol		FALSE
YBL076C	Cytosol		FALSE
YBL079W	Nucleus		FALSE
YBL080C	Mitochondrion		TRUE
YBL085W	Cytosol		FALSE
YBL087C	Mitochondrion		FALSE
YBL088C	Cytosol	Nucleus	FALSE
YBL090W	Mitochondrion		TRUE
YBL092W	Nucleus	Cytosol	TRUE
YBL093C	Nucleus		FALSE
YBL097W	Nucleus	Cytosol	TRUE
YBL103C	Nucleus		FALSE
YBL106C	Nucleus	Cytosol	FALSE
YBR003W	Mitochondrion		FALSE
YBR008C	ER	Lysosome	FALSE
YBR010W	Nucleus		FALSE
YBR011C	Cytosol		FALSE
YBR017C	Cytosol	Nucleus	FALSE
YBR021W	Plasma membrane		FALSE
YBR024W	Mitochondrion		FALSE
YBR026C	Mitochondrion		FALSE
YBR031W	Mitochondrion		FALSE
YBR034C	Cytosol	Nucleus	FALSE
YBR037C	Mitochondrion		FALSE
YBR040W	ER	Nucleus	TRUE
YBR044C	Mitochondrion		FALSE
YBR048W	Nucleus	Cytosol	FALSE
YBR049C	Nucleus		FALSE
YBR066C	Nucleus		FALSE
YBR067C	Plasma membrane		FALSE
YBR068C	Plasma membrane		FALSE
YBR069C	Plasma membrane		FALSE
YBR072W	Nucleus	Cytosol	TRUE
YBR073W	Nucleus		FALSE
YBR083W	Nucleus		FALSE
YBR084C-A	Nucleus	Cytosol	TRUE
YBR084W	Mitochondrion	Cytosol	FALSE
YBR085W	Mitochondrion		FALSE
YBR091C	Mitochondrion		FALSE
YBR093C	Secreted		FALSE
YBR098W	Cytosol	Nucleus	FALSE
YBR101C	Cytosol	Nucleus	FALSE
YBR103W	Nucleus		FALSE
YBR104W	Mitochondrion		FALSE
YBR112C	Nucleus		FALSE
YBR120C	Nucleus	Cytosol	TRUE
YBR122C	Nucleus	Cytosol	TRUE
YBR133C	Cytosol		FALSE
YBR136W	Nucleus	Cytosol	FALSE
YBR142W	Nucleus		FALSE
YBR143C	Cytosol		FALSE
YBR146W	Mitochondrion		TRUE
YBR158W	Cytosol	Nucleus	FALSE
YBR160W	Cytosol	Nucleus	FALSE
YBR165W	Cytosol	Nucleus	FALSE
YBR179C	Mitochondrion		FALSE
YBR182C	Nucleus		FALSE
YBR185C	Mitochondrion		TRUE
YBR186W	Cytosol		FALSE
YBR189W	Nucleus		FALSE
YBR191W	Mitochondrion		FALSE
YBR192W	Mitochondrion		FALSE
YBR196C	Cytosol		FALSE
YBR200W	Cytosol		FALSE
YBR202W	Nucleus		FALSE
YBR215W	Nucleus	Cytosol	TRUE
YBR218C	Cytosol		FALSE
YBR221C	Mitochondrion		FALSE
YBR223C	Nucleus		FALSE
YBR227C	Mitochondrion		FALSE
YBR236C	Nucleus	Cytosol	FALSE
YBR245C	Nucleus		FALSE
YBR247C	Nucleus		FALSE
YBR251W	Nucleus		FALSE
YBR263W	Mitochondrion	Cytosol	FALSE
YBR268W	Mitochondrion		TRUE
YBR274W	Nucleus	Cytosol	FALSE
YBR282W	Nucleus	Cytosol	TRUE
YBR291C	Mitochondrion		FALSE
YBR294W	Plasma membrane		FALSE
YBR296C	ER	Mitochondrion	TRUE
YBR297W	Nucleus		FALSE
YBR301W	Plasma membrane		FALSE
YCL009C	Mitochondrion		FALSE
YCL011C	Nucleus		FALSE
YCL017C	Mitochondrion		FALSE
YCL018W	Cytosol		FALSE
YCL024W	Plasma membrane		FALSE
YCL025C	Plasma membrane		FALSE
YCL027W	Golgi	ER	FALSE
YCL028W	Nucleus	Cytosol	TRUE
YCL040W	Cytosol		FALSE
YCL051W	Nucleus	Cytosol	TRUE
YCL054W	Nucleus		FALSE
YCL055W	Nucleus		FALSE
YCL059C	Nucleus	Cytosol	FALSE
YCL063W	Cytosol		FALSE
YCL066W	Nucleus	Cytosol	TRUE
YCL067C	Nucleus		FALSE
YCR003W	Mitochondrion		FALSE
YCR014C	Nucleus	Cytosol	FALSE
YCR017C	Plasma membrane		FALSE
YCR021C	ER	Mitochondrion	TRUE
YCR024C-A	Plasma membrane		FALSE
YCR027C	Cytosol	Nucleus	FALSE
YCR028C	Plasma membrane	ER	TRUE
YCR028C-A	Mitochondrion		FALSE
YCR030C	Nucleus	Cytosol	TRUE
YCR031C	Nucleus	Cytosol	TRUE
YCR038C	Nucleus	Cytosol	TRUE
YCR039C	Nucleus		FALSE
YCR040W	Nucleus	Cytosol	TRUE
YCR046C	Mitochondrion		TRUE
YCR065W	Nucleus	Cytosol	FALSE
YCR071C	Mitochondrion		FALSE
YCR077C	Nucleus		FALSE
YCR083W	Nucleus	Mitochondrion	FALSE
YCR084C	Cytosol	Nucleus	FALSE
YCR089W	Mitochondrion	Plasma membrane	FALSE
YCR093W	Nucleus		FALSE
YCR097W	Nucleus		FALSE
YCR098C	Plasma membrane		FALSE
YDL006W	Nucleus	Mitochondrion	FALSE
YDL013W	Cytosol	Nucleus	FALSE
YDL014W	Nucleus		FALSE
YDL019C	Golgi		FALSE
YDL029W	Nucleus		FALSE
YDL031W	Nucleus		FALSE
YDL035C	Plasma membrane	ER	TRUE
YDL042C	Nucleus		FALSE
YDL044C	Nucleus	Cytosol	TRUE
YDL045W-A	Cytosol		FALSE
YDL049C	Secreted		FALSE
YDL051W	Nucleus	Cytosol	FALSE
YDL056W	Nucleus		FALSE
YDL059C	Nucleus		FALSE
YDL060W	Nucleus		FALSE
YDL061C	Mitochondrion		FALSE
YDL064W	Cytosol		FALSE
YDL065C	Peroxisome		FALSE
YDL066W	Mitochondrion		FALSE
YDL069C	Mitochondrion		TRUE
YDL070W	Nucleus		FALSE
YDL074C	Cytosol	Nucleus	FALSE
YDL075W	Nucleus	Cytosol	TRUE
YDL081C	Nucleus	Cytosol	TRUE
YDL082W	Nucleus	Cytosol	TRUE
YDL083C	Mitochondrion		TRUE
YDL084W	Nucleus		FALSE
YDL085W	Mitochondrion		FALSE
YDL088C	Cytosol	Nucleus	FALSE
YDL106C	Nucleus		FALSE
YDL107W	Cytosol	Nucleus	FALSE
YDL116W	Cytosol	Nucleus	FALSE
YDL120W	Mitochondrion		FALSE
YDL123W	ER		TRUE
YDL130W	Secreted	ER	TRUE
YDL131W	Cytosol		FALSE
YDL133C-A	Nucleus	Cytosol	TRUE
YDL135C	Cytosol		FALSE
YDL136W	Mitochondrion		FALSE
YDL138W	Plasma membrane		FALSE
YDL142C	Mitochondrion		FALSE
YDL148C	Nucleus		FALSE
YDL153C	Nucleus		FALSE
YDL154W	Nucleus	Cytosol	TRUE
YDL165W	Nucleus		FALSE
YDL166C	Nucleus	Cytosol	TRUE
YDL170W	Nucleus		FALSE
YDL174C	Mitochondrion		FALSE
YDL175C	Nucleus		FALSE
YDL178W	Mitochondrion		FALSE
YDL182W	Cytosol		FALSE
YDL184C	Nucleus	Cytosol	TRUE
YDL185W	Nucleus		FALSE
YDL191W	Mitochondrion		FALSE
YDL194W	Plasma membrane		FALSE
YDL198C	Mitochondrion		FALSE
YDL200C	Nucleus		FALSE
YDL202W	Mitochondrion		TRUE
YDL207W	Nucleus	Cytosol	FALSE
YDL217C	Mitochondrion		FALSE
YDL227C	Nucleus	Cytosol	TRUE
YDL245C	Plasma membrane		FALSE
YDL247W	Plasma membrane		FALSE
YDR002W	Nucleus		FALSE
YDR004W	Cytosol	Nucleus	FALSE
YDR005C	Nucleus		FALSE
YDR006C	Nucleus		FALSE
YDR011W	Plasma membrane	Mitochondrion	FALSE
YDR019C	Mitochondrion		FALSE
YDR021W	Nucleus		FALSE
YDR025W	Nucleus	Cytosol	FALSE
YDR030C	Cytosol		FALSE
YDR033W	ER	Mitochondrion	TRUE
YDR034C	Nucleus		FALSE
YDR038C	Plasma membrane		FALSE
YDR039C	Plasma membrane		FALSE
YDR040C	Plasma membrane		FALSE
YDR041W	Mitochondrion		TRUE
YDR043C	Nucleus		FALSE
YDR044W	Cytosol		FALSE
YDR046C	Plasma membrane		FALSE
YDR055W	Secreted		FALSE
YDR060W	Nucleus		FALSE
YDR064W	Mitochondrion		FALSE
YDR076W	Nucleus		FALSE
YDR077W	Secreted	ER	TRUE
YDR079W	Mitochondrion		TRUE
YDR081C	Nucleus		FALSE
YDR083W	Nucleus	Cytosol	TRUE
YDR092W	Cytosol	Nucleus	FALSE
YDR093W	Plasma membrane		FALSE
YDR097C	Cytosol	Nucleus	FALSE
YDR099W	Cytosol		FALSE
YDR103W	Cytosol	Nucleus	FALSE
YDR110W	Nucleus	Cytosol	TRUE
YDR113C	Nucleus		FALSE
YDR116C	Mitochondrion		FALSE
YDR120C	Mitochondrion		FALSE
YDR123C	Nucleus		FALSE
YDR130C	Nucleus	Cytosol	FALSE
YDR144C	Plasma membrane		FALSE
YDR146C	Nucleus	Cytosol	FALSE
YDR148C	Mitochondrion		FALSE
YDR150W	Golgi		FALSE
YDR159W	Nucleus	Cytosol	FALSE
YDR160W	Plasma membrane		FALSE
YDR172W	Cytosol		FALSE
YDR173C	Nucleus		FALSE
YDR174W	Nucleus		FALSE
YDR175C	Mitochondrion		TRUE
YDR184C	Nucleus	Cytosol	TRUE
YDR190C	Cytosol	Nucleus	FALSE
YDR192C	Cytosol	Nucleus	FALSE
YDR194C	Nucleus		FALSE
YDR197W	Mitochondrion		FALSE
YDR204W	Mitochondrion		FALSE
YDR206W	Nucleus		FALSE
YDR207C	Nucleus		FALSE
YDR208W	Mitochondrion		TRUE
YDR213W	Nucleus	Cytosol	FALSE
YDR216W	Nucleus	Cytosol	FALSE
YDR217C	Nucleus		FALSE
YDR229W	Nucleus		FALSE
YDR231C	Nucleus		FALSE
YDR232W	Mitochondrion		FALSE
YDR236C	Mitochondrion		FALSE
YDR237W	Mitochondrion		FALSE
YDR253C	Nucleus		FALSE
YDR258C	Mitochondrion		FALSE
YDR259C	Nucleus		FALSE
YDR260C	Nucleus	Cytosol	TRUE
YDR261C	Plasma membrane	Secreted	FALSE
YDR263C	Nucleus		FALSE
YDR268W	Mitochondrion		FALSE
YDR276C	ER		TRUE
YDR283C	Cytosol		FALSE
YDR296W	Nucleus		FALSE
YDR303C	Nucleus		FALSE
YDR309C	Cytosol	Plasma membrane	FALSE
YDR310C	Nucleus		FALSE
YDR312W	Nucleus		FALSE
YDR315C	Nucleus	Cytosol	TRUE
YDR322W	Mitochondrion		FALSE
YDR324C	Nucleus	Cytosol	FALSE
YDR335W	Cytosol	Nucleus	FALSE
YDR337W	Mitochondrion		FALSE
YDR343C	Plasma membrane		FALSE
YDR345C	Plasma membrane		FALSE
YDR347W	Mitochondrion		FALSE
YDR363W	Nucleus		FALSE
YDR364C	Nucleus		FALSE
YDR369C	Nucleus		FALSE
YDR375C	ER		FALSE
YDR376W	Mitochondrion		FALSE
YDR382W	Lysosome	Cytosol	FALSE
YDR390C	Nucleus		FALSE
YDR393W	Mitochondrion		TRUE
YDR395W	Nucleus	Cytosol	FALSE
YDR397C	Nucleus		FALSE
YDR398W	Nucleus	Cytosol	FALSE
YDR405W	Mitochondrion		FALSE
YDR418W	Mitochondrion		FALSE
YDR420W	ER	Golgi	TRUE
YDR421W	Nucleus		FALSE
YDR423C	Nucleus	Cytosol	FALSE
YDR432W	Nucleus		FALSE
YDR439W	Nucleus	Cytosol	TRUE
YDR440W	Nucleus	Cytosol	TRUE
YDR446W	Nucleus	Cytosol	TRUE
YDR447C	Mitochondrion		TRUE
YDR450W	Cytosol		FALSE
YDR453C	Cytosol		FALSE
YDR462W	Mitochondrion		FALSE
YDR463W	Nucleus		FALSE
YDR470C	Plasma membrane	ER	TRUE
YDR471W	Nucleus		FALSE
YDR480W	Nucleus		FALSE
YDR487C	Nucleus	Cytosol	TRUE
YDR490C	Cytosol	Nucleus	FALSE
YDR500C	Nucleus	Cytosol	TRUE
YDR507C	Plasma membrane		FALSE
YDR508C	Plasma membrane		FALSE
YDR510W	Nucleus	Cytosol	FALSE
YDR511W	Mitochondrion		TRUE
YDR513W	Mitochondrion		FALSE
YDR522C	Nucleus	Cytosol	TRUE
YDR534C	Plasma membrane		TRUE
YEL009C	Nucleus		FALSE
YEL020W-A	Mitochondrion		FALSE
YEL026W	Nucleus	Cytosol	FALSE
YEL030W	Mitochondrion	Cytosol	FALSE
YEL032W	Nucleus		FALSE
YEL039C	Mitochondrion	Nucleus	FALSE
YEL046C	Nucleus	Cytosol	TRUE
YEL050C	Mitochondrion		FALSE
YEL054C	Mitochondrion		FALSE
YEL055C	Nucleus	Cytosol	FALSE
YEL056W	Cytosol	Nucleus	FALSE
YEL059C-A	Nucleus	Cytosol	TRUE
YEL063C	Plasma membrane		FALSE
YEL069C	Plasma membrane		FALSE
YER002W	Nucleus		FALSE
YER006W	Nucleus		FALSE
YER011W	Plasma membrane		FALSE
YER014W	Mitochondrion		FALSE
YER017C	Mitochondrion		FALSE
YER027C	Nucleus		FALSE
YER028C	Nucleus		FALSE
YER040W	Nucleus		FALSE
YER041W	Nucleus		FALSE
YER045C	Nucleus	Cytosol	FALSE
YER050C	Nucleus	Cytosol	TRUE
YER056C	Plasma membrane		FALSE
YER056C-A	Nucleus	Cytosol	TRUE
YER057C	Cytosol	Nucleus	FALSE
YER058W	ER	Golgi	TRUE
YER061C	Peroxisome		FALSE
YER069W	Mitochondrion		FALSE
YER072W	Nucleus	Plasma membrane	TRUE
YER073W	Mitochondrion		FALSE
YER074W	Mitochondrion		TRUE
YER082C	Cytosol		FALSE
YER102W	Nucleus	Cytosol	TRUE
YER103W	Cytosol		FALSE
YER105C	Cytosol	Nucleus	FALSE
YER107C	Nucleus	Cytosol	FALSE
YER109C	Nucleus		FALSE
YER110C	Cytosol		FALSE
YER111C	Nucleus	Cytosol	FALSE
YER114C	Cytosol		FALSE
YER116C	Cytosol	Nucleus	FALSE
YER117W	Mitochondrion		FALSE
YER126C	Nucleus		FALSE
YER127W	Nucleus		FALSE
YER131W	Mitochondrion		FALSE
YER133W	Cytosol	Nucleus	FALSE
YER141W	Mitochondrion		FALSE
YER142C	Nucleus		FALSE
YER143W	Cytosol	Lysosome	FALSE
YER145C	Lysosome		FALSE
YER148W	Nucleus		FALSE
YER150W	Cytosol		FALSE
YER153C	Mitochondrion		FALSE
YER154W	Mitochondrion		FALSE
YER159C	Nucleus		FALSE
YER161C	Nucleus		FALSE
YER165W	Nucleus	Cytosol	FALSE
YER166W	Plasma membrane		FALSE
YER168C	Mitochondrion		FALSE
YER169W	Nucleus		FALSE
YER170W	Cytosol	Nucleus	FALSE
YER173W	Cytosol		FALSE
YER175C	Cytosol	Nucleus	FALSE
YER177W	Nucleus	Cytosol	FALSE
YER178W	Cytosol	Golgi	FALSE
YER179W	Cytosol		FALSE
YFL001W	Nucleus		FALSE
YFL002C	Nucleus		FALSE
YFL004W	Plasma membrane	ER	TRUE
YFL011W	Mitochondrion		FALSE
YFL016C	Mitochondrion		FALSE
YFL018C	Mitochondrion		FALSE
YFL021W	Nucleus	Cytosol	FALSE
YFL026W	Plasma membrane	ER	TRUE
YFL031W	Nucleus		FALSE
YFL034C-A	Nucleus	Cytosol	TRUE
YFL034C-B	Mitochondrion		TRUE
YFL036W	Mitochondrion		FALSE
YFL050C	Plasma membrane		FALSE
YFL055W	Plasma membrane		FALSE
YFR001W	Nucleus		FALSE
YFR002W	Nucleus	Cytosol	FALSE
YFR005C	Nucleus	Cytosol	TRUE
YFR009W	Cytosol	ER	FALSE
YFR013W	Nucleus		FALSE
YFR028C	Cytosol	Nucleus	FALSE
YFR029W	Nucleus	Cytosol	FALSE
YFR031C-A	Nucleus		FALSE
YFR032C-A	Nucleus		FALSE
YFR033C	Nucleus	Cytosol	TRUE
YFR034C	Nucleus		FALSE
YFR037C	Nucleus		FALSE
YFR049W	Mitochondrion		FALSE
YFR053C	Nucleus	Cytosol	TRUE
YGL003C	Cytosol	Nucleus	FALSE
YGL009C	Mitochondrion		FALSE
YGL013C	Nucleus		FALSE
YGL018C	Mitochondrion		FALSE
YGL021W	Cytosol	Nucleus	FALSE
YGL028C	Secreted	ER	TRUE
YGL029W	Nucleus	Cytosol	TRUE
YGL031C	Nucleus	Cytosol	FALSE
YGL032C	Secreted	ER	TRUE
YGL035C	Nucleus		FALSE
YGL037C	Nucleus	Cytosol	TRUE
YGL056C	Nucleus		FALSE
YGL058W	Nucleus	Cytosol	FALSE
YGL062W	Cytosol		FALSE
YGL064C	Nucleus		FALSE
YGL071W	Nucleus	Cytosol	TRUE
YGL073W	Nucleus		FALSE
YGL076C	Nucleus		FALSE
YGL077C	Plasma membrane		FALSE
YGL078C	Nucleus		FALSE
YGL086W	Nucleus		FALSE
YGL087C	Cytosol	Nucleus	FALSE
YGL089C	Secreted	ER	TRUE
YGL090W	Cytosol	Nucleus	FALSE
YGL091C	Nucleus		FALSE
YGL092W	Cytosol	Nucleus	FALSE
YGL097W	Nucleus		FALSE
YGL100W	Cytosol	Nucleus	FALSE
YGL103W	Mitochondrion		FALSE
YGL115W	Nucleus		FALSE
YGL119W	Cytosol	Nucleus	FALSE
YGL122C	Nucleus	Cytosol	FALSE
YGL123W	Nucleus	Cytosol	TRUE
YGL124C	Cytosol		FALSE
YGL125W	Nucleus	Cytosol	TRUE
YGL129C	Nucleus	Cytosol	TRUE
YGL130W	Nucleus		FALSE
YGL133W	Nucleus		FALSE
YGL135W	Mitochondrion		FALSE
YGL136C	Nucleus		FALSE
YGL143C	Mitochondrion		FALSE
YGL147C	Mitochondrion		FALSE
YGL151W	Nucleus		FALSE
YGL162W	Nucleus		FALSE
YGL163C	Mitochondrion		FALSE
YGL164C	Nucleus	Cytosol	TRUE
YGL166W	Nucleus		FALSE
YGL171W	Nucleus		FALSE
YGL172W	Cytosol	Nucleus	FALSE
YGL174W	Nucleus		FALSE
YGL181W	Nucleus	Cytosol	FALSE
YGL186C	Plasma membrane		FALSE
YGL189C	Mitochondrion		FALSE
YGL195W	Cytosol		FALSE
YGL201C	Nucleus	Cytosol	FALSE
YGL209W	Nucleus		FALSE
YGL236C	Mitochondrion		FALSE
YGL237C	Nucleus		FALSE
YGL241W	Nucleus		FALSE
YGL243W	Nucleus	Cytosol	TRUE
YGL246C	Nucleus	ER	FALSE
YGL251C	Nucleus	Cytosol	FALSE
YGL253W	Nucleus	Cytosol	TRUE
YGL254W	Nucleus		FALSE
YGL255W	Golgi		FALSE
YGR010W	Nucleus		FALSE
YGR014W	ER	Golgi	TRUE
YGR023W	ER	Golgi	TRUE
YGR027C	Nucleus		FALSE
YGR028W	ER		FALSE
YGR029W	ER	Mitochondrion	FALSE
YGR034W	Mitochondrion		FALSE
YGR040W	Cytosol	Nucleus	FALSE
YGR041W	Plasma membrane	Mitochondrion	TRUE
YGR044C	Nucleus		FALSE
YGR055W	Plasma membrane		FALSE
YGR062C	Mitochondrion		FALSE
YGR063C	Nucleus		FALSE
YGR065C	Plasma membrane	ER	TRUE
YGR076C	Nucleus	Cytosol	TRUE
YGR082W	Mitochondrion		FALSE
YGR084C	Mitochondrion		FALSE
YGR085C	Mitochondrion		FALSE
YGR092W	Cytosol	Nucleus	FALSE
YGR096W	Mitochondrion		FALSE
YGR098C	Cytosol	Nucleus	FALSE
YGR101W	Mitochondrion		FALSE
YGR103W	Nucleus		FALSE
YGR112W	Mitochondrion		FALSE
YGR116W	Nucleus		FALSE
YGR118W	Nucleus	Cytosol	FALSE
YGR121C	Plasma membrane		FALSE
YGR123C	Cytosol		FALSE
YGR128C	Nucleus	Cytosol	TRUE
YGR132C	ER	Nucleus	FALSE
YGR142W	Nucleus	Cytosol	TRUE
YGR144W	Cytosol	ER	TRUE
YGR148C	Nucleus	Cytosol	FALSE
YGR152C	Cytosol	Plasma membrane	FALSE
YGR159C	Nucleus		FALSE
YGR163W	Nucleus	Cytosol	TRUE
YGR165W	Mitochondrion		TRUE
YGR171C	Mitochondrion		FALSE
YGR174C	ER	Lysosome	TRUE
YGR178C	Cytosol	Nucleus	FALSE
YGR180C	Cytosol	Nucleus	FALSE
YGR181W	Mitochondrion		FALSE
YGR185C	Cytosol		FALSE
YGR188C	Cytosol	Nucleus	FALSE
YGR189C	ER		FALSE
YGR191W	Plasma membrane		FALSE
YGR193C	Mitochondrion		FALSE
YGR214W	Mitochondrion		FALSE
YGR215W	Nucleus	Cytosol	TRUE
YGR217W	Plasma membrane		FALSE
YGR218W	Nucleus	Cytosol	FALSE
YGR220C	Mitochondrion		FALSE
YGR221C	ER	Lysosome	TRUE
YGR222W	Mitochondrion		FALSE
YGR229C	Nucleus		FALSE
YGR231C	Mitochondrion		TRUE
YGR238C	Cytosol		FALSE
YGR239C	Peroxisome		FALSE
YGR244C	Mitochondrion		TRUE
YGR245C	Nucleus	Cytosol	FALSE
YGR255C	Mitochondrion		TRUE
YGR256W	Mitochondrion		FALSE
YGR260W	Plasma membrane		FALSE
YGR276C	Mitochondrion		FALSE
YGR279C	Secreted	ER	TRUE
YGR280C	Mitochondrion		TRUE
YGR281W	ER		FALSE
YGR288W	Nucleus		FALSE
YHL001W	Nucleus		FALSE
YHL004W	Mitochondrion		FALSE
YHL009C	Nucleus		FALSE
YHL015W	Nucleus	Cytosol	TRUE
YHL016C	ER	Nucleus	TRUE
YHL020C	ER	Cytosol	FALSE
YHL027W	Nucleus		FALSE
YHL033C	Nucleus	Cytosol	TRUE
YHL034C	Cytosol	Nucleus	FALSE
YHL038C	Mitochondrion		TRUE
YHR002W	Mitochondrion		FALSE
YHR005C	Cytosol		FALSE
YHR005C-A	Mitochondrion		FALSE
YHR006W	Nucleus		FALSE
YHR008C	Mitochondrion		FALSE
YHR010W	Nucleus		FALSE
YHR014W	Nucleus		FALSE
YHR015W	Nucleus		FALSE
YHR018C	Nucleus	Cytosol	FALSE
YHR021C	Nucleus	Cytosol	TRUE
YHR024C	Mitochondrion		FALSE
YHR030C	Cytosol	Nucleus	FALSE
YHR037W	Mitochondrion		FALSE
YHR038W	Mitochondrion		FALSE
YHR052W	Nucleus	Mitochondrion	FALSE
YHR053C	Nucleus	Cytosol	TRUE
YHR055C	Nucleus	Cytosol	TRUE
YHR061C	Cytosol	Plasma membrane	FALSE
YHR065C	Nucleus		FALSE
YHR066W	Nucleus		FALSE
YHR076W	Mitochondrion		FALSE
YHR082C	Cytosol	Nucleus	FALSE
YHR084W	Nucleus		FALSE
YHR088W	Nucleus		FALSE
YHR089C	Nucleus		FALSE
YHR090C	Cytosol		FALSE
YHR091C	Mitochondrion		FALSE
YHR092C	Plasma membrane		FALSE
YHR094C	Plasma membrane		FALSE
YHR096C	Plasma membrane		FALSE
YHR106W	Mitochondrion		FALSE
YHR109W	Nucleus	Cytosol	TRUE
YHR117W	Nucleus		FALSE
YHR119W	Mitochondrion	Nucleus	FALSE
YHR120W	Mitochondrion		TRUE
YHR141C	Nucleus	Cytosol	TRUE
YHR143W	Secreted	ER	TRUE
YHR146W	Nucleus	Cytosol	TRUE
YHR147C	Mitochondrion		FALSE
YHR148W	Nucleus		FALSE
YHR152W	Cytosol		FALSE
YHR156C	Nucleus		FALSE
YHR160C	Peroxisome		FALSE
YHR164C	Nucleus		FALSE
YHR169W	Nucleus		FALSE
YHR170W	Cytosol		FALSE
YIL070C	Mitochondrion		FALSE
YIL079C	Nucleus		FALSE
YIL093C	Nucleus	Cytosol	TRUE
YIL098C	Mitochondrion		TRUE
YIL099W	Plasma membrane		FALSE
YIL101C	Nucleus		FALSE
YIL106W	Cytosol	Nucleus	FALSE
YIL113W	Cytosol	Nucleus	FALSE
YIL114C	Mitochondrion		FALSE
YIL119C	Nucleus		FALSE
YIL120W	Plasma membrane		FALSE
YIL122W	Nucleus	Cytosol	TRUE
YIL125W	Mitochondrion		FALSE
YIL126W	Nucleus		FALSE
YIL129C	Cytosol		FALSE
YIL131C	Nucleus	Cytosol	FALSE
YIL133C	Mitochondrion		FALSE
YIL134W	Mitochondrion		FALSE
YIL136W	Mitochondrion		FALSE
YIL139C	Nucleus		FALSE
YIL140W	Plasma membrane		FALSE
YIL147C	Cytosol	Nucleus	FALSE
YIL148W	Nucleus	Cytosol	FALSE
YIL150C	Nucleus		FALSE
YIL153W	Nucleus	Cytosol	TRUE
YIL155C	Mitochondrion		FALSE
YIR002C	Nucleus		FALSE
YIR004W	Nucleus		FALSE
YIR006C	Nucleus	Cytosol	FALSE
YIR011C	Nucleus		FALSE
YIR013C	Nucleus		FALSE
YIR015W	Nucleus	Cytosol	FALSE
YIR017C	Nucleus		FALSE
YIR018W	Nucleus	Cytosol	FALSE
YIR019C	Plasma membrane		TRUE
YIR023W	Nucleus		FALSE
YIR039C	Secreted		FALSE
YJL003W	Mitochondrion		TRUE
YJL005W	Nucleus	Cytosol	FALSE
YJL006C	Nucleus		FALSE
YJL012C	Cytosol		FALSE
YJL013C	Nucleus		FALSE
YJL026W	Cytosol	Nucleus	FALSE
YJL030W	Nucleus		FALSE
YJL033W	Nucleus		FALSE
YJL039C	Nucleus	Cytosol	FALSE
YJL050W	Nucleus		FALSE
YJL052W	Cytosol		FALSE
YJL054W	Mitochondrion		FALSE
YJL056C	Nucleus	Lysosome	FALSE
YJL061W	Cytosol	Nucleus	FALSE
YJL063C	Mitochondrion		FALSE
YJL066C	Nucleus	Cytosol	TRUE
YJL071W	Mitochondrion		FALSE
YJL076W	Nucleus	Cytosol	FALSE
YJL078C	Plasma membrane		TRUE
YJL081C	Nucleus		FALSE
YJL088W	Cytosol		FALSE
YJL089W	Nucleus		FALSE
YJL092W	Nucleus		FALSE
YJL093C	Plasma membrane		FALSE
YJL096W	Mitochondrion		FALSE
YJL102W	Mitochondrion	Cytosol	FALSE
YJL106W	Cytosol	Nucleus	FALSE
YJL109C	Nucleus	Cytosol	FALSE
YJL110C	Nucleus		FALSE
YJL112W	Cytosol		FALSE
YJL121C	Nucleus	Cytosol	TRUE
YJL125C	Cytosol	Nucleus	FALSE
YJL127C	Nucleus	Cytosol	FALSE
YJL129C	Plasma membrane		FALSE
YJL133W	Mitochondrion		FALSE
YJL136C	Nucleus	Cytosol	TRUE
YJL141C	Cytosol		FALSE
YJL143W	Mitochondrion		FALSE
YJL148W	Nucleus	Cytosol	TRUE
YJL155C	Cytosol		FALSE
YJL156C	Nucleus	Cytosol	TRUE
YJL157C	Cytosol		FALSE
YJL159W	Secreted	Plasma membrane	FALSE
YJL167W	Cytosol		FALSE
YJL168C	Nucleus	ER	FALSE
YJL170C	Nucleus	Cytosol	TRUE
YJL174W	Secreted		FALSE
YJL177W	Mitochondrion		FALSE
YJL180C	Mitochondrion		FALSE
YJL187C	Cytosol		FALSE
YJL189W	Nucleus	Cytosol	TRUE
YJL190C	Mitochondrion		FALSE
YJL191W	Nucleus	Cytosol	TRUE
YJL208C	Mitochondrion		FALSE
YJL209W	Mitochondrion		TRUE
YJL214W	Plasma membrane		FALSE
YJL219W	Plasma membrane		FALSE
YJR002W	Nucleus		FALSE
YJR004C	Plasma membrane		FALSE
YJR016C	Mitochondrion		FALSE
YJR017C	Nucleus		FALSE
YJR032W	Cytosol	Nucleus	FALSE
YJR034W	Nucleus	Cytosol	TRUE
YJR035W	Mitochondrion	Nucleus	FALSE
YJR042W	Nucleus	Cytosol	FALSE
YJR043C	Nucleus		FALSE
YJR045C	Mitochondrion		FALSE
YJR046W	Mitochondrion		TRUE
YJR048W	Mitochondrion		FALSE
YJR057W	Nucleus	Cytosol	TRUE
YJR059W	Cytosol	Nucleus	FALSE
YJR060W	Nucleus		FALSE
YJR074W	Nucleus		FALSE
YJR077C	Mitochondrion		FALSE
YJR094C	Nucleus		FALSE
YJR094W-A	Nucleus	Cytosol	TRUE
YJR095W	Mitochondrion		FALSE
YJR101W	Mitochondrion		FALSE
YJR103W	Cytosol		FALSE
YJR104C	Cytosol		FALSE
YJR109C	Cytosol		FALSE
YJR113C	Nucleus		FALSE
YJR123W	Nucleus	Cytosol	TRUE
YJR132W	Nucleus	Cytosol	FALSE
YJR135W-A	Mitochondrion		FALSE
YJR140C	Nucleus		FALSE
YJR144W	Nucleus		FALSE
YJR150C	Plasma membrane		FALSE
YJR151C	Plasma membrane		FALSE
YJR152W	Plasma membrane	ER	TRUE
YJR153W	Secreted	ER	TRUE
YJR158W	Plasma membrane		FALSE
YJR160C	Plasma membrane		FALSE
YKL003C	Mitochondrion		FALSE
YKL006W	Nucleus		FALSE
YKL011C	Nucleus		FALSE
YKL015W	Nucleus		FALSE
YKL018W	Cytosol		FALSE
YKL024C	Nucleus	Cytosol	FALSE
YKL029C	Mitochondrion		TRUE
YKL038W	Nucleus		FALSE
YKL040C	Nucleus	Cytosol	TRUE
YKL043W	Nucleus		FALSE
YKL051W	ER	Mitochondrion	TRUE
YKL054C	Nucleus	Cytosol	TRUE
YKL055C	Peroxisome		FALSE
YKL062W	Nucleus	Cytosol	FALSE
YKL067W	Nucleus	Cytosol	TRUE
YKL068W	Cytosol	Nucleus	FALSE
YKL078W	Nucleus	Cytosol	FALSE
YKL079W	Nucleus	Cytosol	TRUE
YKL082C	Cytosol	Nucleus	FALSE
YKL085W	Mitochondrion	Cytosol	FALSE
YKL087C	Mitochondrion	Nucleus	FALSE
YKL089W	Nucleus		FALSE
YKL096W	Secreted	Plasma membrane	FALSE
YKL096W-A	Secreted	Plasma membrane	FALSE
YKL099C	Nucleus		FALSE
YKL101W	Cytosol		FALSE
YKL106W	Mitochondrion		FALSE
YKL113C	Nucleus		FALSE
YKL114C	Nucleus		FALSE
YKL117W	Cytosol		FALSE
YKL120W	Mitochondrion		FALSE
YKL126W	Cytosol	Nucleus	FALSE
YKL127W	Cytosol		FALSE
YKL134C	Mitochondrion		FALSE
YKL138C	Mitochondrion		TRUE
YKL139W	Nucleus	Cytosol	FALSE
YKL142W	Nucleus	Cytosol	TRUE
YKL146W	Lysosome		FALSE
YKL149C	Nucleus	Cytosol	FALSE
YKL150W	Mitochondrion		FALSE
YKL152C	Cytosol		FALSE
YKL155C	Cytosol		FALSE
YKL163W	Secreted		FALSE
YKL164C	Secreted		FALSE
YKL167C	Mitochondrion		TRUE
YKL170W	Mitochondrion		FALSE
YKL172W	Nucleus		FALSE
YKL178C	ER	Mitochondrion	TRUE
YKL182W	Peroxisome		FALSE
YKL185W	Nucleus		FALSE
YKL186C	Nucleus	Cytosol	TRUE
YKL192C	Mitochondrion		FALSE
YKL193C	Nucleus	Cytosol	FALSE
YKL194C	Mitochondrion		FALSE
YKL210W	Cytosol	Nucleus	FALSE
YKL214C	Nucleus		FALSE
YKL217W	Plasma membrane		FALSE
YKL220C	ER	Mitochondrion	TRUE
YKR006C	Mitochondrion		TRUE
YKR024C	Nucleus		FALSE
YKR034W	Nucleus		FALSE
YKR039W	Plasma membrane		FALSE
YKR042W	Mitochondrion		FALSE
YKR048C	Nucleus		FALSE
YKR050W	Plasma membrane		FALSE
YKR052C	Mitochondrion		FALSE
YKR057W	Nucleus	Cytosol	TRUE
YKR063C	Nucleus	Cytosol	TRUE
YKR066C	Mitochondrion		FALSE
YKR072C	Cytosol	Nucleus	FALSE
YKR080W	Cytosol		FALSE
YKR081C	Nucleus		FALSE
YKR082W	Cytosol	Nucleus	FALSE
YKR085C	Mitochondrion		FALSE
YKR092C	Nucleus	Cytosol	TRUE
YKR093W	Plasma membrane		FALSE
YKR094C	Nucleus	Cytosol	FALSE
YKR097W	Nucleus	Cytosol	TRUE
YKR099W	Nucleus		FALSE
YLL001W	Cytosol		FALSE
YLL006W	Cytosol	ER	TRUE
YLL008W	Nucleus		FALSE
YLL009C	Mitochondrion		FALSE
YLL010C	Plasma membrane		FALSE
YLL011W	Nucleus	Cytosol	FALSE
YLL015W	ER		FALSE
YLL018C-A	Cytosol		FALSE
YLL026W	Cytosol	Nucleus	FALSE
YLL027W	Mitochondrion		FALSE
YLL036C	Nucleus		FALSE
YLL045C	Nucleus	Cytosol	TRUE
YLL061W	Plasma membrane		FALSE
YLR002C	Nucleus		FALSE
YLR007W	Nucleus		FALSE
YLR009W	Nucleus	Cytosol	FALSE
YLR013W	Nucleus		FALSE
YLR014C	Nucleus		FALSE
YLR018C	Nucleus	Cytosol	TRUE
YLR019W	Nucleus		FALSE
YLR028C	Nucleus	Cytosol	TRUE
YLR029C	Nucleus	Cytosol	TRUE
YLR035C	Nucleus	Cytosol	FALSE
YLR037C	Plasma membrane		FALSE
YLR048W	Mitochondrion		FALSE
YLR055C	Nucleus		FALSE
YLR059C	Mitochondrion		FALSE
YLR061W	Nucleus	Cytosol	TRUE
YLR067C	Cytosol	Nucleus	FALSE
YLR069C	Mitochondrion		FALSE
YLR074C	Nucleus		FALSE
YLR075W	Cytosol		FALSE
YLR079W	Plasma membrane	Nucleus	FALSE
YLR081W	Plasma membrane		FALSE
YLR092W	Plasma membrane		FALSE
YLR095C	Cytosol		FALSE
YLR098C	Nucleus		FALSE
YLR106C	Cytosol		FALSE
YLR110C	Secreted	ER	TRUE
YLR113W	Cytosol	Nucleus	FALSE
YLR120C	Plasma membrane		FALSE
YLR121C	Plasma membrane		FALSE
YLR129W	Nucleus	Cytosol	FALSE
YLR130C	Golgi		FALSE
YLR131C	Nucleus		FALSE
YLR133W	Cytosol		FALSE
YLR135W	Nucleus	Cytosol	TRUE
YLR138W	Mitochondrion		FALSE
YLR139C	Mitochondrion		TRUE
YLR142W	Mitochondrion		FALSE
YLR153C	Nucleus	Cytosol	FALSE
YLR154W-A	Nucleus	Cytosol	TRUE
YLR163C	Mitochondrion		FALSE
YLR165C	Nucleus	Cytosol	TRUE
YLR174W	Cytosol		FALSE
YLR175W	Nucleus		FALSE
YLR176C	Nucleus		FALSE
YLR182W	Nucleus		FALSE
YLR185W	Nucleus	Cytosol	TRUE
YLR186W	Nucleus		FALSE
YLR188W	Mitochondrion		FALSE
YLR195C	Cytosol		FALSE
YLR197W	Nucleus		FALSE
YLR214W	ER	Mitochondrion	TRUE
YLR222C	Nucleus	Cytosol	FALSE
YLR228C	Nucleus	Cytosol	FALSE
YLR233C	Nucleus		FALSE
YLR234W	Nucleus		FALSE
YLR237W	Plasma membrane		FALSE
YLR244C	Nucleus	Cytosol	TRUE
YLR256W	Nucleus	Cytosol	FALSE
YLR259C	Mitochondrion		FALSE
YLR264W	Nucleus		FALSE
YLR265C	Nucleus	Cytosol	TRUE
YLR266C	Nucleus		FALSE
YLR276C	Nucleus		FALSE
YLR287C-A	Nucleus	Cytosol	TRUE
YLR288C	Mitochondrion		FALSE
YLR293C	Cytosol	Nucleus	FALSE
YLR304C	Mitochondrion		FALSE
YLR305C	Cytosol		FALSE
YLR312W-A	Mitochondrion		FALSE
YLR318W	Nucleus		FALSE
YLR325C	Nucleus	Cytosol	TRUE
YLR329W	Nucleus		FALSE
YLR332W	ER	Golgi	TRUE
YLR333C	Nucleus		FALSE
YLR335W	Nucleus	Cytosol	FALSE
YLR336C	Cytosol	Nucleus	FALSE
YLR340W	Nucleus		FALSE
YLR344W	Mitochondrion		FALSE
YLR348C	Mitochondrion		FALSE
YLR353W	Nucleus	Plasma membrane	FALSE
YLR355C	Mitochondrion		FALSE
YLR367W	Mitochondrion		FALSE
YLR369W	Mitochondrion	Cytosol	FALSE
YLR371W	Cytosol	Nucleus	FALSE
YLR377C	Nucleus	Cytosol	TRUE
YLR382C	Mitochondrion		FALSE
YLR383W	Nucleus	Cytosol	FALSE
YLR386W	Cytosol		FALSE
YLR388W	Mitochondrion		FALSE
YLR393W	Mitochondrion		FALSE
YLR399C	Nucleus		FALSE
YLR403W	Nucleus		FALSE
YLR406C	Nucleus	Cytosol	TRUE
YLR411W	Nucleus		FALSE
YLR430W	Nucleus	Cytosol	FALSE
YLR439W	Mitochondrion		FALSE
YLR441C	Nucleus	Cytosol	TRUE
YLR442C	Nucleus		FALSE
YLR448W	Cytosol		FALSE
YLR449W	Cytosol		FALSE
YLR451W	Nucleus		FALSE
YLR452C	Nucleus		FALSE
YLR457C	Nucleus		FALSE
YML007W	Nucleus		FALSE
YML009C	Mitochondrion		FALSE
YML010W	Nucleus		FALSE
YML016C	Cytosol		FALSE
YML021C	Nucleus	Mitochondrion	FALSE
YML024W	Mitochondrion		TRUE
YML026C	Cytosol		FALSE
YML027W	Nucleus		FALSE
YML031W	Cytosol	Nucleus	FALSE
YML032C	Nucleus		FALSE
YML051W	Nucleus		FALSE
YML054C	Mitochondrion		FALSE
YML060W	Nucleus		FALSE
YML061C	Nucleus	Mitochondrion	FALSE
YML063W	Nucleus	Cytosol	TRUE
YML069W	Nucleus		FALSE
YML073C	Mitochondrion		TRUE
YML074C	Cytosol	Nucleus	FALSE
YML076C	Nucleus		FALSE
YML078W	Cytosol		FALSE
YML086C	Mitochondrion		FALSE
YML091C	Mitochondrion		TRUE
YML093W	Nucleus	Cytosol	TRUE
YML097C	Cytosol		FALSE
YML098W	Nucleus		FALSE
YML099C	Nucleus		FALSE
YML103C	Nucleus	Cytosol	FALSE
YML109W	Nucleus	Cytosol	FALSE
YML110C	Mitochondrion		FALSE
YML112W	Nucleus		FALSE
YML114C	Nucleus		FALSE
YML116W	Plasma membrane		FALSE
YML121W	Mitochondrion		TRUE
YML123C	Plasma membrane		FALSE
YMR001C	Nucleus	Cytosol	FALSE
YMR006C	Secreted		FALSE
YMR008C	Secreted		FALSE
YMR011W	Plasma membrane		FALSE
YMR014W	Nucleus	Cytosol	TRUE
YMR019W	Nucleus		FALSE
YMR021C	Nucleus		FALSE
YMR023C	Mitochondrion		FALSE
YMR024W	Mitochondrion		FALSE
YMR033W	Nucleus		FALSE
YMR035W	Mitochondrion	ER	FALSE
YMR037C	Nucleus		FALSE
YMR038C	Cytosol		FALSE
YMR039C	Nucleus	Cytosol	TRUE
YMR042W	Nucleus		FALSE
YMR043W	Nucleus		FALSE
YMR044W	Nucleus	Cytosol	TRUE
YMR047C	Cytosol	Nucleus	FALSE
YMR053C	Nucleus		FALSE
YMR056C	Mitochondrion		FALSE
YMR058W	Secreted		FALSE
YMR060C	Nucleus	Cytosol	TRUE
YMR061W	Nucleus	Cytosol	FALSE
YMR062C	Mitochondrion		FALSE
YMR070W	Nucleus		FALSE
YMR072W	Nucleus		FALSE
YMR083W	Mitochondrion		FALSE
YMR092C	Cytosol		FALSE
YMR093W	Nucleus		FALSE
YMR104C	Cytosol		FALSE
YMR105C	Cytosol		FALSE
YMR108W	Mitochondrion		FALSE
YMR120C	Nucleus	Cytosol	TRUE
YMR121C	Nucleus	Cytosol	TRUE
YMR128W	Nucleus		FALSE
YMR129W	Plasma membrane	Cytosol	FALSE
YMR131C	Cytosol	Nucleus	FALSE
YMR136W	Nucleus		FALSE
YMR137C	Mitochondrion		TRUE
YMR142C	Nucleus	Cytosol	TRUE
YMR143W	Mitochondrion		TRUE
YMR145C	Mitochondrion		FALSE
YMR150C	ER	Cytosol	FALSE
YMR158W	Mitochondrion		FALSE
YMR164C	Nucleus		FALSE
YMR167W	Cytosol	Nucleus	FALSE
YMR177W	Mitochondrion		FALSE
YMR180C	Nucleus		FALSE
YMR182C	Nucleus		FALSE
YMR188C	Nucleus	Cytosol	FALSE
YMR189W	Mitochondrion		TRUE
YMR190C	Nucleus		FALSE
YMR193W	Mitochondrion		FALSE
YMR194W	Nucleus	Cytosol	TRUE
YMR208W	Cytosol		FALSE
YMR215W	Plasma membrane		FALSE
YMR219W	Nucleus		FALSE
YMR220W	Cytosol		FALSE
YMR224C	Nucleus		FALSE
YMR225C	Nucleus	Cytosol	TRUE
YMR227C	Nucleus		FALSE
YMR228W	Mitochondrion		FALSE
YMR229C	Nucleus	Cytosol	FALSE
YMR230W	Nucleus		FALSE
YMR235C	Cytosol		FALSE
YMR238W	Plasma membrane		FALSE
YMR239C	Mitochondrion	Nucleus	FALSE
YMR242C	Nucleus	Cytosol	TRUE
YMR257C	Mitochondrion		FALSE
YMR267W	Cytosol		FALSE
YMR275C	Nucleus	Cytosol	TRUE
YMR276W	Cytosol	Nucleus	FALSE
YMR277W	Nucleus		FALSE
YMR280C	Nucleus		FALSE
YMR282C	Cytosol	Nucleus	FALSE
YMR286W	Mitochondrion		FALSE
YMR287C	Nucleus	Cytosol	FALSE
YMR290C	Nucleus		FALSE
YMR301C	Mitochondrion		FALSE
YMR302C	Nucleus	Mitochondrion	FALSE
YMR308C	Cytosol	Nucleus	FALSE
YMR319C	Plasma membrane	Cytosol	FALSE
YNL002C	Nucleus		FALSE
YNL003C	Mitochondrion		FALSE
YNL004W	Nucleus		FALSE
YNL005C	Nucleus	Cytosol	FALSE
YNL007C	Cytosol		FALSE
YNL012W	Secreted		FALSE
YNL014W	Nucleus	Cytosol	FALSE
YNL016W	Nucleus	Cytosol	FALSE
YNL027W	Nucleus		FALSE
YNL037C	Mitochondrion		FALSE
YNL059C	Nucleus		FALSE
YNL061W	Nucleus		FALSE
YNL062C	Nucleus	Cytosol	TRUE
YNL065W	Plasma membrane		FALSE
YNL066W	Mitochondrion		FALSE
YNL067W	Mitochondrion		FALSE
YNL068C	Nucleus	Cytosol	FALSE
YNL069C	Mitochondrion		FALSE
YNL070W	Nucleus	Cytosol	TRUE
YNL071W	Mitochondrion		FALSE
YNL073W	Mitochondrion		FALSE
YNL075W	Nucleus		FALSE
YNL078W	Nucleus		FALSE
YNL088W	Nucleus		FALSE
YNL096C	Nucleus	Cytosol	TRUE
YNL097C	Cytosol		FALSE
YNL098C	Cytosol		FALSE
YNL103W	Nucleus		FALSE
YNL110C	Nucleus		FALSE
YNL112W	Nucleus		FALSE
YNL118C	Cytosol		FALSE
YNL121C	Mitochondrion		FALSE
YNL125C	Plasma membrane	ER	TRUE
YNL131W	Mitochondrion		FALSE
YNL137C	Nucleus		FALSE
YNL142W	Plasma membrane		FALSE
YNL145W	Cytosol	Plasma membrane	FALSE
YNL148C	Cytosol		FALSE
YNL154C	Cytosol		FALSE
YNL160W	Secreted		FALSE
YNL161W	Cytosol		FALSE
YNL162W	Nucleus	Cytosol	TRUE
YNL164C	Nucleus	Cytosol	TRUE
YNL166C	Cytosol	Nucleus	FALSE
YNL167C	Nucleus		FALSE
YNL169C	Mitochondrion		FALSE
YNL173C	Nucleus	Cytosol	TRUE
YNL175C	Nucleus		FALSE
YNL177C	Mitochondrion		FALSE
YNL178W	Nucleus	Cytosol	FALSE
YNL185C	Mitochondrion		FALSE
YNL186W	Nucleus	Cytosol	FALSE
YNL189W	Nucleus	Cytosol	FALSE
YNL192W	Plasma membrane		FALSE
YNL199C	Nucleus	Cytosol	TRUE
YNL207W	Nucleus	Cytosol	FALSE
YNL210W	Nucleus	Cytosol	FALSE
YNL216W	Nucleus		FALSE
YNL218W	Nucleus	Cytosol	FALSE
YNL222W	Nucleus		FALSE
YNL250W	Cytosol		FALSE
YNL251C	Nucleus		FALSE
YNL252C	Mitochondrion		TRUE
YNL257C	Nucleus		FALSE
YNL259C	Cytosol		FALSE
YNL268W	Plasma membrane		FALSE
YNL270C	Plasma membrane		FALSE
YNL272C	Cytosol		FALSE
YNL284C	Mitochondrion		FALSE
YNL290W	Cytosol	Nucleus	FALSE
YNL291C	Secreted	ER	TRUE
YNL292W	Nucleus		FALSE
YNL293W	Mitochondrion	Golgi	FALSE
YNL299W	Nucleus		FALSE
YNL301C	Nucleus	Cytosol	TRUE
YNL302C	Nucleus		FALSE
YNL304W	Plasma membrane		FALSE
YNL306W	Mitochondrion		TRUE
YNL308C	Nucleus	Cytosol	TRUE
YNL309W	Nucleus		FALSE
YNL314W	Nucleus		FALSE
YNL315C	Mitochondrion		FALSE
YNL318C	Plasma membrane		FALSE
YNL322C	ER	Lysosome	TRUE
YNL327W	Plasma membrane		TRUE
YNL328C	ER	Mitochondrion	FALSE
YNR001C	Mitochondrion		FALSE
YNR003C	Nucleus		FALSE
YNR011C	Nucleus		FALSE
YNR017W	Mitochondrion		FALSE
YNR022C	Mitochondrion		TRUE
YNR031C	Cytosol	Nucleus	FALSE
YNR037C	Mitochondrion		FALSE
YNR038W	Nucleus		FALSE
YNR041C	Mitochondrion		FALSE
YNR043W	Cytosol		FALSE
YNR044W	Plasma membrane		TRUE
YNR045W	Mitochondrion		FALSE
YNR053C	Nucleus		FALSE
YNR055C	Plasma membrane	ER	TRUE
YNR056C	Plasma membrane		FALSE
YNR060W	ER	Mitochondrion	TRUE
YNR067C	Secreted	ER	TRUE
YNR072W	Plasma membrane		FALSE
YOL006C	Nucleus		FALSE
YOL009C	Nucleus	Cytosol	TRUE
YOL010W	Nucleus		FALSE
YOL011W	Secreted		FALSE
YOL017W	Nucleus		FALSE
YOL020W	Plasma membrane		FALSE
YOL023W	Mitochondrion		FALSE
YOL028C	Nucleus	Cytosol	FALSE
YOL030W	Plasma membrane		FALSE
YOL033W	Mitochondrion		FALSE
YOL034W	Nucleus	Cytosol	FALSE
YOL039W	Nucleus	Mitochondrion	TRUE
YOL040C	Mitochondrion		FALSE
YOL041C	Nucleus		FALSE
YOL043C	Nucleus		FALSE
YOL056W	Cytosol		FALSE
YOL058W	Nucleus	Cytosol	TRUE
YOL059W	Mitochondrion		FALSE
YOL067C	Nucleus		FALSE
YOL068C	Nucleus		FALSE
YOL072W	Cytosol		FALSE
YOL077C	Nucleus		FALSE
YOL086C	Cytosol		FALSE
YOL089C	Nucleus		FALSE
YOL095C	Nucleus		FALSE
YOL096C	Mitochondrion		FALSE
YOL100W	Cytosol	Nucleus	FALSE
YOL102C	Nucleus	Cytosol	FALSE
YOL108C	Nucleus		FALSE
YOL112W	Golgi		FALSE
YOL115W	Nucleus		FALSE
YOL116W	Nucleus		FALSE
YOL120C	Nucleus	Cytosol	TRUE
YOL121C	Nucleus		FALSE
YOL123W	Nucleus		FALSE
YOL127W	Mitochondrion		FALSE
YOL132W	Plasma membrane		FALSE
YOL139C	Nucleus	Cytosol	FALSE
YOL140W	Mitochondrion		FALSE
YOL144W	Nucleus		FALSE
YOL145C	Nucleus		FALSE
YOL151W	Nucleus	Cytosol	TRUE
YOL156W	Plasma membrane		FALSE
YOR005C	Nucleus		FALSE
YOR009W	Plasma membrane		FALSE
YOR010C	Secreted	Plasma membrane	FALSE
YOR014W	Cytosol		FALSE
YOR017W	Mitochondrion		TRUE
YOR018W	Cytosol		FALSE
YOR020C	Mitochondrion		FALSE
YOR025W	Nucleus		FALSE
YOR028C	Nucleus	Cytosol	FALSE
YOR033C	Nucleus		FALSE
YOR037W	Mitochondrion		FALSE
YOR038C	Nucleus		FALSE
YOR040W	Mitochondrion		FALSE
YOR045W	Mitochondrion		TRUE
YOR047C	Nucleus		FALSE
YOR048C	Nucleus	Cytosol	FALSE
YOR056C	Nucleus	Cytosol	FALSE
YOR063W	Mitochondrion	Cytosol	FALSE
YOR074C	Nucleus	Cytosol	TRUE
YOR078W	Nucleus	Cytosol	TRUE
YOR096W	Nucleus	Cytosol	TRUE
YOR098C	Nucleus	Cytosol	FALSE
YOR100C	Mitochondrion		FALSE
YOR101W	Plasma membrane		FALSE
YOR108W	Mitochondrion		FALSE
YOR113W	Nucleus		FALSE
YOR125C	Cytosol	Nucleus	FALSE
YOR130C	Mitochondrion		FALSE
YOR136W	Mitochondrion		FALSE
YOR141C	Nucleus		FALSE
YOR142W	Mitochondrion		TRUE
YOR145C	Nucleus	Cytosol	TRUE
YOR150W	Mitochondrion		FALSE
YOR153W	Plasma membrane	ER	FALSE
YOR158W	Mitochondrion		TRUE
YOR160W	Cytosol	Nucleus	FALSE
YOR162C	Nucleus		FALSE
YOR167C	Nucleus	Cytosol	TRUE
YOR176W	Mitochondrion		FALSE
YOR182C	Nucleus	Cytosol	TRUE
YOR185C	Cytosol		FALSE
YOR187W	Mitochondrion		FALSE
YOR188W	Nucleus	Cytosol	TRUE
YOR190W	Secreted		FALSE
YOR191W	Nucleus		FALSE
YOR196C	Mitochondrion		FALSE
YOR197W	Nucleus	Cytosol	TRUE
YOR201C	Mitochondrion		FALSE
YOR206W	Nucleus		FALSE
YOR208W	Nucleus	Cytosol	FALSE
YOR209C	Nucleus	Cytosol	FALSE
YOR211C	Mitochondrion		FALSE
YOR212W	Cytosol		FALSE
YOR221C	Nucleus	Cytosol	TRUE
YOR222W	Mitochondrion		FALSE
YOR226C	Mitochondrion		TRUE
YOR229W	Cytosol		FALSE
YOR230W	Cytosol		FALSE
YOR232W	Mitochondrion		FALSE
YOR234C	Mitochondrion		TRUE
YOR236W	Nucleus	Cytosol	TRUE
YOR257W	Nucleus		FALSE
YOR266W	Cytosol	ER	TRUE
YOR272W	Nucleus	Cytosol	FALSE
YOR274W	Nucleus	Cytosol	FALSE
YOR279C	Nucleus		FALSE
YOR293W	Nucleus		FALSE
YOR294W	Nucleus		FALSE
YOR297C	Mitochondrion		FALSE
YOR298C-A	Nucleus	Cytosol	TRUE
YOR303W	Cytosol		FALSE
YOR304W	Nucleus		FALSE
YOR310C	Nucleus		FALSE
YOR312C	Nucleus	Cytosol	TRUE
YOR328W	Plasma membrane	ER	FALSE
YOR330C	Mitochondrion		FALSE
YOR334W	Mitochondrion		FALSE
YOR337W	Nucleus		FALSE
YOR344C	Nucleus		FALSE
YOR346W	Nucleus		FALSE
YOR347C	Mitochondrion		TRUE
YOR348C	Plasma membrane		FALSE
YOR351C	Cytosol		FALSE
YOR359W	Cytosol	Nucleus	FALSE
YOR363C	Nucleus		FALSE
YOR368W	Nucleus	Cytosol	TRUE
YOR369C	Nucleus	Cytosol	TRUE
YOR372C	Nucleus	Cytosol	TRUE
YOR374W	Mitochondrion		FALSE
YOR375C	Nucleus		FALSE
YOR380W	Nucleus		FALSE
YOR381W	ER	Mitochondrion	TRUE
YOR382W	Plasma membrane		TRUE
YOR383C	Plasma membrane		TRUE
YOR386W	Nucleus		FALSE
YOR388C	Nucleus	Cytosol	TRUE
YPL001W	Nucleus		FALSE
YPL008W	Nucleus		FALSE
YPL013C	Mitochondrion		TRUE
YPL018W	Nucleus		FALSE
YPL019C	Mitochondrion		FALSE
YPL020C	Nucleus	Cytosol	TRUE
YPL028W	Cytosol	Peroxisome	FALSE
YPL029W	Nucleus		FALSE
YPL031C	Cytosol		FALSE
YPL036W	Plasma membrane	ER	FALSE
YPL038W	Nucleus		FALSE
YPL040C	Mitochondrion		FALSE
YPL043W	Nucleus		FALSE
YPL048W	Cytosol		FALSE
YPL049C	Nucleus		FALSE
YPL058C	ER	Plasma membrane	FALSE
YPL059W	Mitochondrion		FALSE
YPL060W	Mitochondrion		FALSE
YPL063W	Mitochondrion		FALSE
YPL075W	Cytosol		FALSE
YPL079W	Nucleus	Cytosol	FALSE
YPL089C	Nucleus		FALSE
YPL090C	Nucleus	Cytosol	TRUE
YPL092W	ER	Nucleus	TRUE
YPL093W	Nucleus		FALSE
YPL096W	Cytosol		FALSE
YPL097W	Mitochondrion		FALSE
YPL100W	Nucleus	Cytosol	FALSE
YPL104W	Mitochondrion		FALSE
YPL111W	Cytosol	Nucleus	FALSE
YPL116W	Nucleus		FALSE
YPL117C	Cytosol		FALSE
YPL118W	Nucleus	Cytosol	TRUE
YPL123C	Nucleus	Cytosol	TRUE
YPL126W	Cytosol	Golgi	FALSE
YPL127C	Nucleus		FALSE
YPL128C	Nucleus		FALSE
YPL130W	Plasma membrane		TRUE
YPL131W	Cytosol		FALSE
YPL132W	Mitochondrion		FALSE
YPL134C	Mitochondrion		FALSE
YPL135W	Mitochondrion		TRUE
YPL139C	Nucleus		FALSE
YPL143W	Mitochondrion		TRUE
YPL148C	Mitochondrion		TRUE
YPL152W	Nucleus	Cytosol	TRUE
YPL153C	Nucleus	Cytosol	FALSE
YPL157W	Mitochondrion		TRUE
YPL164C	Nucleus		FALSE
YPL167C	Nucleus		FALSE
YPL172C	Mitochondrion		FALSE
YPL173W	Mitochondrion		FALSE
YPL177C	Nucleus		FALSE
YPL183W-A	Mitochondrion		TRUE
YPL187W	ER	Plasma membrane	FALSE
YPL188W	Mitochondrion		TRUE
YPL198W	Nucleus		FALSE
YPL202C	Nucleus	Cytosol	TRUE
YPL204W	Cytosol		FALSE
YPL211W	Nucleus	Cytosol	FALSE
YPL212C	Nucleus		FALSE
YPL215W	Mitochondrion		FALSE
YPL217C	Nucleus	Cytosol	FALSE
YPL220W	Mitochondrion		FALSE
YPL224C	Nucleus		FALSE
YPL228W	Nucleus		FALSE
YPL232W	Golgi		FALSE
YPL235W	Cytosol	Nucleus	FALSE
YPL248C	Nucleus		FALSE
YPL249C	Mitochondrion		FALSE
YPL249C-A	Nucleus	Cytosol	TRUE
YPL252C	Mitochondrion		FALSE
YPL256C	Nucleus		FALSE
YPL262W	Mitochondrion		FALSE
[truncated: 4,365 more rows]
