# Supplementary material for: Refining Protein Subcellular Localization
Source: PLoS Comput Biol. 2005 Nov 25;1(6):e66. doi: 10.1371/journal.pcbi.0010066 (PMC1289393; doi:10.1371/journal.pcbi.0010066)
Supplement: Table S2 — (876 KB XLS) [file pcbi.0010066.st002.xls]

## Sheet: SubComp_prediction-anno-compari
SGD Systematic name	Sub-compartmental localization annotation from UniProt or literature	Sub-compartmental prediction		Signal type (from SignalP, S=signal peptide, A=signal anchor, Q=neither)	Topology (from TMHMM)	Targeting type (fromTargetP, S=signal peptide, M=mitochondrial presequence, -=neither)	GPI anchor (from DGPI, y=GPI anchor, n=no GPI anchor)
YAL001C	Nuclear	Nuclear		Q	o	-	n
YAL002W	Golgi periphery	Golgi periphery		Q	o	-	n
YAL003W	-	Cytosolic		Q	o	-	n
YAL004W	-	Cytosolic and nuclear		Q	o	-	n
YAL005C	Cytosolic	Cytosolic		Q	o	-	n
YAL007C	-	ER memb		S	o5-24i181-203o	S	n
YAL008W	-	Mito memb		Q	i106-128o172-194i	M	n
YAL009W	-	Cytosolic and nuclear		Q	i73-95o105-127i	-	n
YAL010C	-	Cytosolic and nuclear		Q	o	-	n
YAL011W	Nuclear	Mito lumen		Q	o	M	n
YAL012W	Cytosolic	Cytosolic and nuclear		Q	o	-	n
YAL013W	Cytosolic	Nuclear		Q	o	-	n
YAL014C	-	Golgi memb		Q	i235-254o	-	n
YAL015C	Mito lumen	Nuclear		Q	o	-	n
YAL016W	-	Golgi periphery		S	o	M	n
YAL017W	-	Cytosolic and nuclear		Q	o	-	n
YAL018C	-	Cytosolic and nuclear		S	i56-75o90-112i117-139o207-229i263-285o	-	n
YAL019W	-	Mito lumen		Q	o	-	n
YAL020C	-	Nuclear		Q	o	-	n
YAL021C	Cytosolic and nuclear	Cytosolic and nuclear		Q	o	-	n
YAL022C	-	PM		Q	i79-101o116-137i150-172o177-199i212-234o244-266i343-365o375-392i412-434o444-466i493-515o	-	n
YAL023C	-	ER memb		Q	o59-78i159-181o196-218i231-248o253-272i285-304o609-631i644-663o673-692i712-734o	-	n
YAL024C	-	Cytosolic and nuclear		Q	o	-	n
YAL025C	Nuclear	Nuclear		Q	o	-	n
YAL026C	-	Golgi memb		Q	o410-427i448-470o495-517i1009-1031o1051-1073i1094-1116o1131-1153i1160-1182o1202-1219i	-	n
YAL027W	-	Nuclear		Q	o	-	n
YAL028W	-	Cytosolic		Q	o508-525i	-	n
YAL029C	-	Cytosolic		Q	o	-	n
YAL030W	-	Golgi memb		Q	i94-116o	-	n
YAL031C	-	Cytosolic and nuclear		Q	o	-	n
YAL032C	-	Nuclear		Q	o	M	n
YAL033W	-	Cytosolic and nuclear		Q	o	-	n
YAL034C	-	Nuclear		A	i20-42o	M	n
YAL034C-B	-	Nuclear		S	o	S	n
YAL034W-A	-	Cytosolic and nuclear		Q	o	-	n
YAL035W	-	Cytosolic and nuclear		Q	o	-	n
YAL036C	-	Cytosolic and nuclear		Q	o	-	n
YAL037W	-	Cytosolic and nuclear		Q	o	-	n
YAL038W	-	Cytosolic and nuclear		Q	o	-	n
YAL039C	Mito lumen	Mito lumen		Q	o	-	n
YAL040C	-	Nuclear		Q	o	-	n
YAL041W	-	PM		Q	o	-	n
YAL042C-A	-	ER periphery		Q	o96-113i	-	n
YAL042W	-	ER memb		A	o376-398i	-	n
YAL043C	-	Nuclear		Q	o	-	n
YAL044C	-	Mito lumen		Q	o	M	n
YAL044W-A	-	Cytosolic and nuclear		Q	o	-	n
YAL045C	-	Cytosolic and nuclear		Q	o	-	n
YAL046C	-	Cytosolic and nuclear		Q	o	M	n
YAL047C	-	Cytosolic and nuclear		Q	o	-	n
YAL048C	-	Cytosolic		Q	o633-655i	-	n
YAL049C	-	Cytosolic and nuclear		Q	o	-	n
YAL051W	-	Nuclear		Q	o	-	n
YAL053W	-	ER memb		S	o183-205i212-234o348-370i402-421o436-455i493-515o519-541i548-570o580-602i	S	n
YAL054C	-	Cytosolic and nuclear		Q	o	-	n
YAL055W	Peroxisome memb	Peroxisome lumen		A	o15-32i	S	n
YAL056C-A	-	Cytosolic and nuclear		Q	o	-	n
YAL056W	Mito periphery	Cytosolic		Q	o	-	n
YAL058W	-	ER memb		S	o482-501i	S	y
YAL059W	-	Cytosolic and nuclear		Q	o	M	n
YAL060W	-	Cytosolic		Q	o	-	n
YAL061W	-	Cytosolic		Q	o	-	n
YAL062W	-	Cytosolic and nuclear		Q	o	-	n
YAL063C	-	Secreted and PM periphery (outside cell)		S	i7-29o	S	y
YAL064C-A	-	PM periphery (inside cell)		Q	o	-	n
YAL064W	-	Mito lumen		Q	o	M	n
YAL064W-B	-	PM		Q	i35-54o69-91i96-118o	-	n
YAL065C	-	ER periphery		Q	i105-127o	-	n
YAL066W	-	Cytosolic and nuclear		Q	i39-61o66-83i	S	n
YAL067C	-	PM		Q	i131-149o176-198i205-227o232-254i266-288o303-322i376-398o413-432i439-461o467-486i499-521o532-554i	-	n
YAL068C	-	PM periphery (inside cell)		S	o	S	n
YAL069W	-	Cytosolic and nuclear		Q	o	S	n
YAR002C-A	-	ER memb		S	o5-27i187-206o	S	n
YAR002W	Nuclear	Nuclear		Q	o	M	n
YAR003W	-	Cytosolic and nuclear		Q	o	-	n
YAR007C	Nuclear	Nuclear		Q	o	-	n
YAR008W	-	Cytosolic		Q	o	-	n
YAR009C	-	Cytosolic and nuclear		Q	o	-	n
YAR010C	-	Cytosolic and nuclear		Q	o	-	n
YAR014C	-	Cytosolic		Q	o	-	n
YAR015W	-	Cytosolic and nuclear		Q	o	-	n
YAR018C	-	Cytosolic and nuclear		Q	o	M	n
YAR019C	-	Cytosolic and nuclear		Q	o	-	n
YAR020C	-	PM periphery (inside cell)		S	i7-26o	S	n
YAR023C	-	ER lumen		S	i2-24o	S	n
YAR027W	-	ER memb		Q	o51-68i75-97o	-	n
YAR028W	-	ER memb		Q	o50-69i76-98o	-	n
YAR029W	-	ER periphery		Q	o	-	n
YAR030C	-	Mito lumen		A	o	M	n
YAR031W	-	ER memb		Q	i112-131o141-163i	-	n
YAR033W	-	ER memb		A	o45-67i74-96o	-	n
YAR035W	Mito periphery	Peroxisome lumen		Q	o	-	n
YAR042W	-	Golgi periphery		Q	o	-	n
YAR044W	-	Golgi periphery		Q	o	-	n
YAR047C	-	Cytosolic and nuclear		Q	o31-53i74-96o	S	n
YAR050W	Plasma memb periphery (outside cell)	Secreted and PM periphery (outside cell)		S	i7-26o	S	y
YAR053W	-	Cytosolic and nuclear		Q	o	-	n
YAR060C	-	Cytosolic and nuclear		Q	i	-	n
YAR061W	-	PM periphery (inside cell)		S	o	S	n
YAR062W	-	PM periphery (inside cell)		Q	o	-	n
YAR064W	-	Secreted and PM periphery (outside cell)		Q	o	-	y
YAR066W	-	Mito lumen		S	o	M	n
YAR068W	-	Secreted and PM periphery (outside cell)		S	o	S	y
YAR069C	-	Cytosolic and nuclear		Q	i7-29o73-95i	S	y
YAR070C	-	Cytosolic and nuclear		Q	o	S	n
YAR071W	-	Secreted and PM periphery (outside cell)		S	o	S	n
YAR073W	-	Nuclear		Q	o	-	n
YAR075W	-	Cytosolic and nuclear		Q	o	S	n
YBL001C	Cytosolic and nuclear	Cytosolic and nuclear		Q	o	S	n
YBL002W	Nuclear	Nuclear		Q	o	-	n
YBL003C	Nuclear	Nuclear		Q	o	M	n
YBL004W	-	Cytosolic and nuclear		Q	o	-	n
YBL005W	-	Nuclear		Q	o	-	n
YBL005W-A	-	Cytosolic and nuclear		Q	o	-	n
YBL005W-B	-	Cytosolic and nuclear		Q	o	-	n
YBL006C	-	Cytosolic and nuclear		Q	o	-	n
YBL007C	-	Cytosolic		Q	o	-	n
YBL008W	Nuclear	Nuclear		Q	o	-	n
YBL009W	-	Cytosolic and nuclear		Q	o	-	n
YBL010C	-	Cytosolic and nuclear		Q	o	-	n
YBL011W	-	Mito memb		Q	o49-66i435-457o494-516i523-545o	-	n
YBL012C	-	ER periphery		Q	i99-121o	-	n
YBL013W	-	Mito lumen		Q	o	M	n
YBL014C	-	Cytosolic and nuclear		Q	o	-	n
YBL015W	Cytosolic	Cytosolic		Q	o	-	n
YBL016W	Cytosolic and nuclear	Cytosolic and nuclear		Q	o	-	n
YBL017C	Golgi memb	Golgi memb		S	o1393-1415i	S	n
YBL018C	-	Cytosolic and nuclear		Q	o	-	n
YBL019W	Nuclear	Nuclear		Q	o	-	n
YBL020W	-	PM		Q	i21-43o48-70i111-133o148-170i182-204o219-241i375-397o412-434i439-461o471-490i510-529o534-553i	-	n
YBL021C	Nuclear	Nuclear		Q	o	-	n
YBL022C	Mito lumen	Mito lumen		Q	o	M	n
YBL023C	Nuclear	Cytosolic and nuclear		Q	o	-	n
YBL024W	Nuclear	Nuclear		Q	o	-	n
YBL025W	-	ER periphery		Q	o	-	n
YBL026W	Nuclear	Nuclear		Q	o	-	n
YBL027W	-	Cytosolic and nuclear		Q	o	-	n
YBL028C	-	Mito lumen		Q	o	M	n
YBL029C-A	-	Cytosolic and nuclear		Q	o	-	n
YBL029W	-	Cytosolic and nuclear		Q	o	-	n
YBL030C	Mito memb	Mito memb		Q	o126-148i189-211o226-248i	-	n
YBL031W	-	Nuclear		Q	o	-	n
YBL032W	-	Cytosolic and nuclear		Q	o	-	n
YBL033C	-	Cytosolic and nuclear		Q	o	-	n
YBL034C	-	Cytosolic and nuclear		Q	o	-	n
YBL035C	Nuclear	Nuclear		Q	o	-	n
YBL036C	-	Cytosolic and nuclear		Q	o	-	n
YBL037W	Plasma memb periphery (cytosolic side)	Secreted and PM periphery (outside cell)		Q	o	-	y
YBL038W	Mito lumen	Mito lumen		Q	o	-	n
YBL039C	-	Mito lumen		Q	o	-	n
YBL040C	ER memb	ER memb		Q	o56-78i99-116o152-174i186-205o	S	n
YBL041W	-	ER periphery		Q	o	-	n
YBL042C	-	PM		Q	i132-149o159-181i193-215o220-242i255-277o282-304i368-390o485-507i538-560o570-592i	-	n
YBL043W	-	Cytosolic and nuclear		Q	o	-	n
YBL044W	-	Cytosolic and nuclear		Q	o	-	n
YBL045C	Mito lumen	Mito lumen		Q	o	M	n
YBL046W	-	Nuclear		Q	o	-	n
YBL047C	-	Cytosolic and nuclear		Q	o	-	n
YBL048W	-	ER memb		A	i7-29o39-58i	S	n
YBL049W	-	Cytosolic		Q	o	-	n
YBL050W	Golgi periphery	Golgi periphery		Q	o	-	n
YBL051C	-	Nuclear		Q	o	-	n
YBL052C	-	Cytosolic and nuclear		Q	o	-	n
YBL053W	-	ER memb		S	i21-43o	S	n
YBL054W	-	Nuclear		Q	o	M	n
YBL055C	-	Mito lumen		Q	o	M	n
YBL056W	-	ER periphery		Q	o	-	n
YBL057C	Cytosolic	Cytosolic		S	i12-34o	S	n
YBL058W	-	Nuclear		Q	o	-	n
YBL059C-A	-	Cytosolic		Q	o	-	n
YBL059W	-	PM		Q	i71-88o123-145i	-	n
YBL060W	-	Golgi periphery		Q	o	-	n
YBL061C	-	PM periphery (inside cell)		Q	o	-	n
YBL062W	-	ER memb		S	i9-31o72-94i	S	n
YBL063W	-	Nuclear		Q	o	M	n
YBL064C	-	Cytosolic		Q	o	M	n
YBL065W	-	ER lumen		S	o10-32i	S	n
YBL066C	-	Nuclear		Q	o	-	n
YBL067C	-	Cytosolic and nuclear		Q	o	-	n
YBL068W	-	Cytosolic		Q	o	-	n
YBL069W	Plasma memb periphery (cytosolic side)	Cytosolic		Q	o	-	n
YBL070C	-	Cytosolic and nuclear		Q	o33-55i83-105o	S	n
YBL071C	-	Peroxisome lumen		Q	o	-	n
YBL071W-A	-	Cytosolic and nuclear		Q	o	-	n
YBL072C	-	Cytosolic and nuclear		Q	o	-	n
YBL073W	-	Cytosolic and nuclear		Q	o	-	n
YBL074C	Cytosolic and nuclear	Cytosolic and nuclear		Q	o	-	n
YBL075C	Cytosolic	Cytosolic		Q	o	-	n
YBL076C	Cytosolic	Cytosolic		Q	o	-	n
YBL077W	-	Cytosolic and nuclear		Q	o	-	n
YBL078C	-	Vacuole periphery		Q	o	-	n
YBL079W	mNuclear	Nuclear		Q	o	-	n
YBL080C	-	Mito lumen		Q	o	M	n
YBL081W	-	Cytosolic and nuclear		Q	o	-	n
YBL082C	-	ER memb		Q	o35-57i128-150o170-192i205-227o242-264i303-320o351-370i377-399o419-441i	-	n
YBL083C	-	Cytosolic and nuclear		Q	o	-	n
YBL084C	Cytosolic and nuclear	Cytosolic and nuclear		Q	o	-	n
YBL085W	-	Cytosolic		Q	o	-	n
YBL086C	-	Cytosolic and nuclear		Q	o	-	n
YBL087C	-	Mito lumen		Q	o	-	n
YBL088C	-	Cytosolic and nuclear		Q	o	-	n
YBL089W	vacuole memb	Vacuole memb		Q	i55-77o81-103i186-205o210-232i292-314o329-348i412-434o439-461i482-504o	S	n
YBL090W	-	Mito lumen		Q	o	M	n
YBL091C	-	Cytosolic and nuclear		Q	o	-	n
YBL091C-A	-	Mito lumen		Q	i79-98o	-	y
YBL092W	-	Cytosolic and nuclear		Q	o	-	n
YBL093C	Nuclear	Nuclear		Q	o	-	n
YBL094C	-	Cytosolic and nuclear		Q	i65-87o	S	n
YBL095W	-	Secreted and PM periphery (outside cell)		S	o	S	n
YBL096C	-	Secreted and PM periphery (outside cell)		S	o	S	n
YBL097W	-	Cytosolic and nuclear		Q	o	-	n
YBL098W	-	Secreted and PM periphery (outside cell)		S	o	S	n
YBL099W	Mito lumen	Mito lumen		S	o	M	n
YBL100C	-	Mito memb		Q	i77-96o	M	n
YBL101C	-	Cytosolic and nuclear		Q	o	-	n
YBL101W-A	-	Cytosolic and nuclear		Q	o	-	n
YBL101W-B	-	Cytosolic and nuclear		Q	o	-	n
YBL102W	-	Cytosolic and nuclear		Q	i82-104o114-136i148-165o169-191i	-	y
YBL103C	-	Nuclear		Q	o	-	n
YBL104C	-	Cytosolic and nuclear		Q	o	-	n
YBL105C	-	Cytosolic		Q	o	-	n
YBL106C	-	Cytosolic and nuclear		Q	o	-	n
YBL107C	-	Cytosolic and nuclear		Q	o	-	n
YBL107W-A	-	Cytosolic and nuclear		Q	o	-	n
YBL108C-A	-	PM periphery (inside cell)		Q	o	-	n
YBL108W	-	Mito lumen		A	o	S	n
YBL109W	-	Cytosolic and nuclear		Q	o	-	n
YBL111C	-	Nuclear		Q	o	-	n
YBL112C	-	Cytosolic and nuclear		Q	o	-	n
YBL113C	-	Cytosolic and nuclear		Q	o	-	n
YBR001C	-	Cytosolic		Q	o	-	n
YBR002C	ER periphery	Cytosolic		Q	o	-	n
YBR003W	Mito lumen	Mito lumen		Q	o	M	n
YBR004C	-	Cytosolic and nuclear		Q	i7-25o108-130i151-168o198-220i247-269o322-339i352-371o410-432i	S	y
YBR005W	-	ER memb		A	o40-62i	-	n
YBR006W	-	Cytosolic and nuclear		Q	o	-	n
YBR007C	-	Cytosolic and nuclear		Q	o	-	n
YBR008C	-	ER memb		Q	i104-126o136-158i171-193o198-220i227-249o259-281i339-361o376-398i415-437o447-469i474-496o511-533i	S	n
YBR009C	-	Nuclear		Q	o	-	n
YBR010W	-	Nuclear		Q	i	-	n
YBR011C	Cytosolic	Cytosolic		Q	o	-	n
YBR012C	-	Peroxisome lumen		Q	i	-	n
YBR012W-A	-	Cytosolic and nuclear		Q	o	-	n
YBR012W-B	-	Cytosolic and nuclear		Q	o	-	n
YBR013C	-	Secreted and PM periphery (outside cell)		S	o	S	y
YBR014C	-	Mito lumen		S	o10-27i	S	n
YBR015C	-	ER memb		A	i7-26o	S	n
YBR016W	-	Cytosolic and nuclear		Q	o	-	n
YBR017C	-	Cytosolic and nuclear		Q	o	-	n
YBR018C	-	Cytosolic and nuclear		Q	o	-	n
YBR019C	-	Cytosolic and nuclear		Q	o	-	n
YBR020W	-	Cytosolic		Q	o	-	n
YBR021W	-	PM		Q	o75-97i110-132o147-169i181-203o239-261i268-288o308-330i350-372o399-421i442-459o469-491i515-537o557-579i	-	n
YBR022W	-	Cytosolic and nuclear		Q	o	-	n
YBR023C	-	PM		Q	o168-190i203-224o454-476i1029-1051o1055-1077i1084-1106o	-	n
YBR024W	-	Mito lumen		Q	o	M	n
YBR025C	-	Nuclear		Q	o	-	n
YBR026C	Mito lumen	Mito lumen		Q	o	M	n
YBR027C	-	ER memb		S	i7-26o41-63i	S	n
YBR028C	-	Cytosolic and nuclear		Q	o	-	n
YBR029C	-	PM		Q	i67-89o156-178i185-207o217-239i252-274o328-350i	-	n
YBR030W	-	Nuclear		Q	o	-	n
YBR031W	-	Mito lumen		Q	o	-	n
YBR032W	-	Cytosolic and nuclear		Q	o	-	n
YBR033W	-	Nuclear		Q	o	-	n
YBR034C	-	Cytosolic and nuclear		Q	o	-	n
YBR035C	-	Cytosolic and nuclear		Q	o	-	n
YBR036C	-	PM		S	o53-75i130-152o167-189i196-215o246-268i288-305o325-347i386-403o	S	n
YBR037C	Mito lumen	Mito lumen		Q	o	M	n
YBR038W	-	PM		Q	o642-664i677-699o709-731i744-766o776-798i876-896o906-928i	M	n
YBR039W	Mito lumen	Mito lumen		Q	o	M	n
YBR040W	-	ER memb		A	i17-39o161-183i195-217o242-264i	S	n
YBR041W	-	Mito memb		S	i7-29o54-71i149-171o	S	n
YBR042C	-	Mito memb		A	o15-37i58-80o119-138i374-396o	S	n
YBR043C	-	PM		Q	i109-131o141-163i176-194o199-221i234-256o266-283i470-492o512-534i555-577o587-609i620-642o646-668i	-	n
YBR044C	Mito lumen	Mito lumen		Q	o	M	n
YBR045C	-	Cytosolic and nuclear		Q	o	M	n
YBR046C	-	Cytosolic		Q	o	-	n
YBR047W	-	Mito lumen		Q	o	M	n
YBR048W	-	Cytosolic and nuclear		Q	o	-	n
YBR049C	Nuclear	Nuclear		Q	o	-	n
YBR050C	-	Cytosolic		Q	o	-	n
YBR051W	-	ER memb		S	i17-39o70-89i	S	n
YBR052C	-	Secreted and PM periphery (outside cell)		Q	o	-	n
YBR053C	-	Golgi periphery		Q	o	-	n
YBR054W	-	PM		Q	i35-54o69-91i112-129o139-161i168-190o203-225i238-260o	-	n
YBR055C	Nuclear	Cytosolic and nuclear		Q	o	-	n
YBR056W	-	PM periphery (inside cell)		Q	o	-	n
YBR057C	-	Cytosolic and nuclear		Q	o	-	n
YBR058C	-	Cytosolic		Q	o	-	n
YBR058C-A	-	Cytosolic		Q	o57-79i	-	n
YBR059C	-	Cytosolic and nuclear		Q	o	M	n
YBR060C	Nuclear	Nuclear		Q	o	-	n
YBR061C	-	Nuclear		Q	o	-	n
YBR062C	-	Cytosolic and nuclear		Q	o	-	n
YBR063C	-	Cytosolic and nuclear		Q	o	-	n
YBR064W	-	Cytosolic and nuclear		Q	o10-29i101-123o	S	n
YBR065C	Nuclear	Nuclear		Q	o	-	n
YBR066C	-	Nuclear		Q	o	-	n
YBR067C	-	Secreted and PM periphery (outside cell)		S	o	S	y
YBR068C	-	PM		Q	i99-116o126-148i161-183o211-228i235-257o289-311i332-349o378-400i428-447o457-479i500-522o537-556i	-	n
YBR069C	-	PM		Q	i99-121o131-153i166-188o203-225i232-254o282-304i325-342o372-394i422-441o451-473i494-516o531-548i	-	n
YBR070C	-	ER lumen		S	i5-24o	S	n
YBR071W	-	Mito lumen		Q	o	M	n
YBR072W	-	Cytosolic and nuclear		Q	o	-	n
YBR073W	-	Nuclear		Q	o	-	n
YBR074W	-	ER memb		A	i13-35o358-380i	S	n
YBR075W	-	PM		Q	i114-136o151-173i178-200o	-	n
YBR076W	-	Cytosolic and nuclear		Q	o	-	n
YBR077C	-	Cytosolic and nuclear		Q	o	-	n
YBR078W	-	Secreted and PM periphery (outside cell)		S	o407-429i434-456o	S	y
YBR079C	-	Cytosolic		Q	o	-	n
YBR080C	-	Golgi periphery		Q	o	-	n
YBR081C	Nuclear	Nuclear		Q	o	-	n
YBR082C	-	Cytosolic and nuclear		Q	o	-	n
YBR083W	Nuclear	Nuclear		Q	o	-	n
YBR084C-A	-	Cytosolic and nuclear		Q	o	-	n
YBR084W	Mito lumen	Mito lumen		Q	o	M	n
YBR085C-A	-	Cytosolic and nuclear		Q	o	-	n
YBR085W	Mito memb	Mito memb		Q	i12-34o115-137i178-200o215-237i	-	n
YBR086C	-	Cytosolic and nuclear		Q	i122-144o154-175i221-243o253-275i303-325o451-473i508-530o566-588i	-	n
YBR087W	-	Cytosolic and nuclear		Q	o	-	n
YBR088C	Nuclear	Nuclear		Q	o	-	n
YBR089C-A	Nuclear	Nuclear		Q	i	-	n
YBR089W	-	Cytosolic and nuclear		Q	o	-	n
YBR090C	-	Mito memb		A	o10-27i	M	n
YBR091C	-	Mito lumen		Q	o	-	n
YBR092C	-	Secreted and PM periphery (outside cell)		S	o	S	n
YBR093C	Plasma memb periphery (outside cell)	Secreted and PM periphery (outside cell)		S	o	S	n
YBR094W	-	Cytosolic and nuclear		Q	o	-	n
YBR095C	-	Nuclear		S	o	-	n
YBR096W	-	Secreted and PM periphery (outside cell)		S	o	S	n
YBR097W	Golgi periphery	Golgi periphery		Q	o	-	n
YBR098W	Nuclear	Cytosolic and nuclear		Q	o	-	n
YBR099C	-	PM		Q	i44-66o81-103i	-	n
YBR101C	-	Cytosolic and nuclear		Q	o	-	n
YBR102C	-	Cytosolic		Q	o	-	n
YBR103C-A	-	Mito lumen		Q	i	M	n
YBR103W	Nuclear	Nuclear		Q	o	-	n
YBR104W	-	Mito lumen		Q	o	-	n
YBR105C	-	Cytosolic and nuclear		Q	o	-	n
YBR106W	-	Cytosolic and nuclear		Q	o28-47i	S	n
YBR107C	-	Cytosolic and nuclear		Q	o	-	n
YBR108W	-	Cytosolic and nuclear		Q	o	-	n
YBR109C	-	Cytosolic and nuclear		Q	o	-	n
YBR110W	-	ER memb		A	o10-32i	S	n
YBR111C	-	Cytosolic		Q	o	M	n
YBR112C	Nuclear	Nuclear		Q	o	-	n
YBR113W	-	ER memb		A	i37-59o118-140i	S	n
YBR114W	Nuclear	Nuclear		Q	o	-	n
YBR115C	-	Cytosolic and nuclear		Q	o	-	n
YBR116C	-	ER periphery		Q	i135-157o	-	n
YBR117C	-	Mito lumen		Q	o	-	n
YBR118W	Cytosolic	Cytosolic		Q	o	-	n
YBR119W	-	Nuclear		Q	o	-	n
YBR120C	-	Cytosolic and nuclear		Q	o	-	n
YBR121C	-	Cytosolic		Q	o	-	n
YBR122C	-	Cytosolic and nuclear		Q	o	-	n
YBR123C	Nuclear	Nuclear		Q	o	-	n
YBR124W	-	Golgi memb		S	o81-103i	S	n
YBR125C	-	Cytosolic		Q	o	-	n
YBR126C	-	Nuclear		Q	o	-	n
YBR127C	-	Cytosolic		Q	o	-	n
YBR128C	-	Cytosolic and nuclear		Q	o	-	n
YBR129C	-	Cytosolic and nuclear		Q	o	-	n
YBR130C	-	Cytosolic and nuclear		Q	o	-	n
YBR131W	-	Golgi periphery		Q	o	-	n
YBR132C	-	PM		Q	i93-115o125-147i164-186o201-223i230-252o284-306i327-346o380-402i429-448o458-480i504-526o536-555i	-	n
YBR133C	-	Cytosolic		Q	o	-	n
YBR134W	-	Cytosolic and nuclear		Q	o	-	n
YBR135W	-	Cytosolic and nuclear		Q	o	-	n
YBR136W	-	Cytosolic and nuclear		Q	o	-	n
YBR137W	Cytosolic	Cytosolic		Q	o	-	n
YBR138C	-	Cytosolic and nuclear		Q	o	-	n
YBR139W	-	Vacuole lumen		S	o	S	n
YBR140C	-	Cytosolic		Q	o	-	n
YBR141C	-	Cytosolic and nuclear		Q	o	-	n
YBR142W	-	Nuclear		Q	o	-	n
YBR143C	Cytosolic	Cytosolic		Q	o	-	n
YBR144C	-	Golgi periphery		Q	o	M	n
YBR145W	-	Cytosolic		Q	o	-	n
YBR146W	-	Mito lumen		Q	o	M	n
YBR147W	-	ER memb		A	o15-37i44-66o70-89i164-186o206-224i237-259o263-285i	S	n
YBR148W	-	Cytosolic and nuclear		Q	o	-	n
YBR149W	Cytosolic	Cytosolic and nuclear		Q	o	-	n
YBR150C	-	Nuclear		Q	o	-	n
YBR151W	-	Cytosolic and nuclear		Q	o	-	n
YBR152W	-	Nuclear		Q	o	-	n
YBR153W	-	Secreted and PM periphery (outside cell)		Q	o	-	y
YBR154C	Nuclear	Nuclear		Q	o	-	n
YBR155W	-	Cytosolic		Q	o	-	n
YBR156C	-	Cytosolic and nuclear		Q	o	-	n
YBR157C	-	Cytosolic and nuclear		Q	o	-	n
YBR158W	-	Cytosolic and nuclear		Q	o	M	n
YBR159W	-	Peroxisome memb		A	i20-42o	S	n
YBR160W	-	Cytosolic and nuclear		Q	o	-	n
YBR161W	-	ER memb		A	i7-29o201-220i274-296o	S	n
YBR162C	-	ER lumen		S	o	S	n
YBR162W-A	-	ER memb		A	i44-63o	-	n
YBR163W	-	Mito lumen		Q	o	M	n
YBR164C	Golgi periphery	Golgi periphery		Q	o	-	n
YBR165W	-	Cytosolic and nuclear		Q	o	M	n
YBR166C	-	Cytosolic and nuclear		Q	o	-	n
YBR167C	-	Cytosolic and nuclear		Q	i	-	n
YBR168W	-	Cytosolic and nuclear		Q	i67-84o99-121i178-197o207-226i	-	n
YBR169C	-	Cytosolic		Q	o	-	n
YBR170C	-	ER periphery		Q	o	-	n
YBR171W	ER memb	ER memb		A	o28-50i	-	n
YBR172C	-	Nuclear		S	o	S	n
YBR173C	-	Cytosolic and nuclear		Q	o	-	n
YBR174C	-	Cytosolic and nuclear		Q	o	-	n
YBR175W	-	Cytosolic and nuclear		Q	o	-	n
YBR176W	-	Mito lumen		Q	o	M	n
YBR177C	-	Vacuole lumen		Q	o	-	n
YBR178W	-	Cytosolic and nuclear		Q	o	-	n
YBR179C	Mito memb	Mito lumen		Q	o	-	n
YBR180W	-	PM		Q	i111-133o148-170i177-199o203-225i238-260o265-287i367-389o404-426i447-469o473-495i508-530o540-562i	-	n
YBR181C	-	Cytosolic and nuclear		Q	o	-	n
YBR182C	-	Nuclear		Q	o	-	n
YBR183W	ER memb	ER memb		Q	i69-88o134-156i163-185o200-222i	-	n
YBR184W	-	Cytosolic and nuclear		Q	o	-	n
YBR185C	-	Mito lumen		Q	o	M	n
YBR186W	-	Cytosolic		Q	o	-	n
YBR187W	-	ER memb		S	i72-94o104-121i184-202o222-244i251-273o	S	n
YBR188C	-	PM periphery (inside cell)		Q	o	-	n
YBR189W	-	Nuclear		Q	o	-	n
YBR190W	-	Mito lumen		Q	o	M	n
YBR191W	-	Mito lumen		Q	o	M	n
YBR191W-A	-	Mito lumen		Q	o	M	n
YBR192W	-	Mito lumen		Q	o	-	n
YBR193C	-	Cytosolic and nuclear		Q	o	-	n
YBR194W	-	Cytosolic and nuclear		Q	i	-	n
YBR195C	Nuclear	Nuclear		Q	o	-	n
YBR196C	Cytosolic	Cytosolic		Q	o	-	n
YBR197C	-	Cytosolic and nuclear		Q	o	-	n
YBR198C	-	Cytosolic and nuclear		Q	o	-	n
YBR199W	-	Golgi periphery		A	i12-31o	S	n
YBR200W	-	Cytosolic		Q	o	-	n
YBR201W	ER memb	ER memb		Q	i13-35o55-77i94-116o143-165i	S	n
YBR202W	-	Nuclear		Q	o	-	n
YBR203W	-	Mito lumen		Q	o	M	n
YBR204C	-	Peroxisome lumen		Q	o	-	n
YBR205W	-	Golgi memb		A	i27-44o	M	n
YBR206W	-	Cytosolic and nuclear		Q	o	-	n
YBR207W	vacuole memb	Vacuole memb		A	o10-32i134-156o169-191i231-253o263-285i292-314o366-388i	S	n
YBR208C	-	Mito lumen		Q	o	-	n
YBR209W	-	Mito memb		A	i30-49o	M	n
YBR210W	-	ER memb		S	i7-29o59-81i112-134o	S	n
YBR211C	-	Cytosolic		Q	o	-	n
YBR212W	-	Nuclear		Q	o	-	n
YBR213W	-	Cytosolic and nuclear		Q	o	-	n
YBR214W	-	Mito lumen		Q	o	M	n
YBR215W	-	Cytosolic and nuclear		Q	o	-	n
YBR216C	-	Cytosolic and nuclear		Q	o	-	n
YBR217W	-	Cytosolic		Q	o	-	n
YBR218C	Cytosolic	Cytosolic		Q	o	-	n
YBR219C	-	PM		Q	o10-29i65-84o99-118i	-	n
YBR220C	-	ER memb		A	i21-43o53-75i95-117o137-159i171-193o213-235i331-350o385-407i420-442o523-542i	S	n
YBR221C	Mito lumen	Mito lumen		S	o	M	n
YBR222C	Peroxisome lumen	Peroxisome lumen		Q	o	-	n
YBR223C	Nuclear	Nuclear		Q	o	-	n
YBR224W	-	ER memb		S	i12-34o69-91i139-161o	S	n
YBR225W	-	Cytosolic and nuclear		Q	o	-	n
YBR226C	-	Cytosolic and nuclear		Q	o	-	n
YBR227C	Mito lumen	Mito lumen		Q	o	M	n
YBR228W	-	Cytosolic and nuclear		Q	o	-	n
YBR229C	-	Secreted and PM periphery (outside cell)		S	o	S	n
YBR230C	-	Cytosolic and nuclear		Q	i	-	n
YBR231C	-	Cytosolic and nuclear		Q	o	-	n
YBR232C	-	Cytosolic and nuclear		Q	o	S	n
YBR233W	-	Cytosolic and nuclear		Q	o	-	n
YBR233W-A	-	Cytosolic and nuclear		Q	o	-	n
YBR234C	-	Cytosolic and nuclear		Q	o	-	n
YBR235W	-	PM		Q	o88-110i144-166o197-214i221-243o287-306i319-341o364-386i393-415o430-452i473-495o	M	n
YBR236C	-	Cytosolic and nuclear		Q	o	-	n
YBR237W	Nuclear	Nuclear		Q	o	-	n
YBR238C	-	Mito lumen		Q	o	M	n
YBR239C	-	Nuclear		Q	o	-	n
YBR240C	-	Nuclear		Q	o	-	n
YBR241C	-	Mito memb		A	i20-42o87-109i116-138o142-164i205-222o298-320i333-352o367-389i394-416o420-442i447-469o	-	n
YBR242W	-	Cytosolic and nuclear		Q	o	-	n
YBR243C	ER memb	ER memb		S	i21-43o71-93i161-183o198-220i225-247o257-274i281-303o	S	n
YBR244W	-	Cytosolic		Q	o	-	n
YBR245C	-	Nuclear		Q	o	-	n
YBR246W	-	Cytosolic and nuclear		Q	o	-	n
YBR247C	Nuclear	Nuclear		Q	o	-	n
YBR248C	-	Cytosolic and nuclear		Q	o	-	n
YBR249C	-	Cytosolic and nuclear		Q	o	-	n
YBR250W	-	Cytosolic and nuclear		Q	o	-	n
YBR251W	-	Nuclear		Q	o	-	n
YBR252W	-	Cytosolic and nuclear		Q	o	-	n
YBR253W	-	Nuclear		Q	o	-	n
YBR254C	-	Golgi periphery		Q	o	-	n
YBR255C-A	-	ER periphery		Q	o23-45i	-	n
YBR255W	-	ER periphery		Q	o653-675i	-	n
YBR256C	-	Cytosolic and nuclear		Q	o	-	n
YBR257W	-	Cytosolic and nuclear		Q	o	-	n
YBR258C	-	Cytosolic and nuclear		Q	i	-	n
YBR259W	-	Cytosolic and nuclear		Q	o	-	n
YBR260C	-	Cytosolic		Q	o	-	n
YBR261C	-	Cytosolic and nuclear		Q	o	-	n
YBR262C	-	Mito lumen		A	o	M	n
YBR263W	-	Mito lumen		S	o	S	n
YBR264C	-	Cytosolic		Q	o	-	n
YBR265W	-	Peroxisome memb		Q	o285-307i	-	n
YBR266C	-	Mito memb		Q	o75-97i104-126o	M	n
YBR267W	-	Nuclear		Q	o	-	n
YBR268W	-	Mito lumen		Q	o	M	n
YBR269C	-	Mito lumen		Q	o	M	n
YBR270C	-	Mito lumen		Q	o	M	n
YBR271W	-	Cytosolic and nuclear		Q	o	-	n
YBR272C	-	Cytosolic		Q	o	-	n
YBR273C	-	Cytosolic and nuclear		Q	o	-	n
YBR274W	-	Cytosolic and nuclear		Q	o	-	n
YBR275C	-	Nuclear		Q	o	-	n
YBR276C	-	Cytosolic and nuclear		Q	o	-	n
YBR277C	-	Secreted and PM periphery (outside cell)		S	o	S	y
YBR278W	Nuclear	Nuclear		Q	o	-	n
YBR279W	Nuclear	Nuclear		Q	o	-	n
YBR280C	-	Nuclear		Q	o	-	n
YBR281C	-	Cytosolic and nuclear		Q	o	-	n
YBR282W	-	Cytosolic and nuclear		Q	o	-	n
YBR283C	ER memb	ER memb		A	o33-52i122-141o145-167i174-196o246-268i288-310o360-382i418-440o450-469i	S	n
YBR284W	-	Cytosolic and nuclear		Q	o	-	n
YBR285W	-	Nuclear		Q	o	-	n
YBR286W	Vacuole lumen	Vacuole lumen		Q	o	-	n
YBR287W	-	ER memb		S	i7-29o71-90i252-274o327-349i362-384o399-421i	S	n
YBR288C	-	Golgi periphery		Q	o	-	n
YBR289W	Nuclear	Nuclear		Q	o	-	n
YBR290W	-	PM		Q	o180-202i209-226o279-301i	-	n
YBR291C	Mito memb	Mito lumen		S	o	-	n
YBR292C	-	PM		Q	i21-43o76-98i	-	n
YBR293W	-	ER memb		Q	i36-58o63-85i98-120o124-143i168-185o195-217i237-259o274-296i301-323o336-358i371-393o446-463i	S	n
YBR294W	-	PM		Q	i118-140o205-227i234-256o290-312i333-355o396-415i428-450o465-487i523-545o	-	n
YBR295W	-	PM		Q	o558-580i593-612o627-649i809-831o851-873i1165-1187o1192-1214i	-	n
YBR296C	-	ER memb		S	o4-26i47-69o84-106i118-140o150-172i185-207o222-244i401-420o450-472i540-562o	S	n
YBR297W	Nuclear	Nuclear		Q	o	-	n
YBR298C	-	PM		Q	i184-206o278-300i365-387o397-419i426-445o460-482i495-517o527-544i	-	n
YBR299W	-	Cytosolic and nuclear		Q	o	-	n
YBR300C	-	Cytosolic		S	o5-27i	S	n
YBR301W	-	PM periphery (inside cell)		S	o	S	n
YBR302C	-	ER memb		Q	i46-63o73-95i233-255o259-281i	-	n
YCL001W	Golgi memb	Golgi memb		Q	i62-84o137-159i	-	n
YCL001W-A	-	Cytosolic and nuclear		Q	o	-	n
YCL001W-B	-	Cytosolic		Q	o	-	n
YCL002C	-	Cytosolic and nuclear		A	i19-41o56-75i82-104o124-146i	S	y
YCL004W	Mito lumen	Mito lumen		Q	o	M	n
YCL005W	-	Cytosolic and nuclear		Q	o29-51i72-94o	S	n
YCL007C	-	ER periphery		Q	i111-128o	-	n
YCL008C	Cytosolic	Cytosolic		Q	o	-	n
YCL009C	Mito lumen	Mito lumen		S	o	M	n
YCL010C	-	Nuclear		Q	o	-	n
YCL011C	-	Nuclear		Q	o	-	n
YCL014W	-	Mito lumen		Q	o	-	n
YCL016C	-	Cytosolic and nuclear		Q	o	-	n
YCL017C	Mito lumen	Mito lumen		Q	o	M	n
YCL018W	Cytosolic	Cytosolic		Q	o	-	n
YCL019W	-	Cytosolic and nuclear		Q	o	-	n
YCL020W	-	Cytosolic and nuclear		Q	o	-	n
YCL021W-A	-	ER periphery		Q	i103-120o	-	n
YCL022C	-	ER memb		A	i55-77o87-109i	S	n
YCL023C	-	Cytosolic and nuclear		A	i38-57o67-89i	M	n
YCL024W	Plasma memb periphery (cytosolic side)	PM periphery (inside cell)		Q	o	-	n
YCL025C	-	PM		Q	i125-147o157-179i199-221o236-253i265-287o314-336i357-374o403-425i450-472o482-504i525-547o562-581i	-	n
YCL026C-A	-	Cytosolic and nuclear		Q	o	-	n
YCL027C-A	-	Cytosolic and nuclear		Q	o	-	n
YCL027W	-	Golgi memb		S	i72-94o	S	n
YCL028W	-	Cytosolic and nuclear		Q	o	-	n
YCL029C	-	Cytosolic and nuclear		Q	o	-	n
YCL030C	-	Cytosolic and nuclear		Q	o	-	n
YCL031C	-	Cytosolic and nuclear		Q	o	-	n
YCL032W	-	Cytosolic		Q	o	-	n
YCL033C	-	Mito lumen		Q	o	M	n
YCL034W	-	Cytosolic and nuclear		Q	o	-	n
YCL035C	-	Cytosolic		Q	o	-	n
YCL036W	-	Cytosolic and nuclear		Q	o	-	n
YCL037C	-	Nuclear		Q	o	-	n
YCL038C	-	PM		Q	i96-118o131-150i157-179o206-228i240-262o321-343i355-377o392-414i421-443o485-504i	-	n
YCL039W	-	Cytosolic and nuclear		Q	o	-	n
YCL040W	-	Cytosolic		Q	o	-	n
YCL041C	-	ER memb		S	o10-29i59-81o96-118i	S	n
YCL042W	-	Cytosolic and nuclear		Q	o	-	n
YCL043C	-	ER lumen		S	o	S	n
YCL044C	-	Cytosolic and nuclear		Q	o	-	n
YCL045C	-	ER memb		S	i7-26o730-749i	S	n
YCL046W	-	Nuclear		Q	o	-	n
YCL047C	-	Cytosolic and nuclear		Q	o	-	n
YCL048W	-	Secreted and PM periphery (outside cell)		S	i9-28o	S	y
YCL049C	-	Secreted and PM periphery (outside cell)		S	o	S	n
YCL050C	-	Cytosolic and nuclear		Q	o	-	n
YCL051W	-	Cytosolic and nuclear		Q	o	-	n
YCL052C	ER memb	ER memb		Q	o386-405i	-	n
YCL054W	Nuclear	Nuclear		Q	o	-	n
YCL055W	Nuclear	Nuclear		Q	o	-	n
YCL056C	-	Cytosolic and nuclear		Q	o	-	n
YCL057C-A	-	ER periphery		Q	i36-58o	-	n
YCL057W	Cytosolic	Mito lumen		Q	o	M	n
YCL058C	-	Cytosolic and nuclear		Q	i89-111o126-148i	S	n
YCL059C	-	Cytosolic and nuclear		Q	o	-	n
YCL061C	-	Cytosolic and nuclear		Q	o	-	n
YCL063W	-	Cytosolic		Q	o	-	n
YCL064C	-	Cytosolic		Q	o	-	n
YCL065W	-	ER memb		Q	i21-40o55-77i98-120o	S	n
YCL066W	-	Cytosolic and nuclear		Q	o	-	n
YCL067C	Nuclear	Nuclear		Q	o	-	n
YCL068C	-	Cytosolic and nuclear		Q	o	S	n
YCL069W	-	PM		A	o4-26i38-60o64-86i127-149o164-186i206-228o248-270i275-297o307-326i346-368o419-438i	S	n
YCL073C	-	PM		Q	o60-79i122-141o151-173i185-207o217-236i276-293o308-325i345-367o382-404i411-430o440-462i545-567o	-	n
YCL074W	-	Cytosolic and nuclear		Q	o	-	n
YCL075W	-	PM periphery (inside cell)		Q	o	-	n
YCL076W	-	Cytosolic and nuclear		Q	o	-	n
YCR001W	-	ER periphery		Q	i76-98o	-	n
YCR002C	Plasma memb periphery (cytosolic side)	Nuclear		Q	o	-	n
YCR003W	Mito lumen	Mito lumen		Q	o	-	n
YCR004C	-	Secreted and PM periphery (outside cell)		Q	o	-	n
YCR005C	Peroxisome lumen	Peroxisome lumen		Q	o	-	n
YCR006C	-	Cytosolic and nuclear		Q	o	S	n
YCR007C	-	ER memb		Q	o56-75i82-104o	-	n
YCR008W	-	Cytosolic and nuclear		Q	o	-	n
YCR009C	-	Cytosolic and nuclear		Q	o	-	n
YCR010C	-	PM		Q	o117-139i151-173o186-203i210-232o242-261i	-	n
YCR011C	ER memb	ER memb		S	i7-25o325-344i794-813o828-850i909-931o936-958i998-1020o1025-1046i	S	n
YCR012W	Cytosolic	Cytosolic		Q	o	-	n
YCR013C	-	Cytosolic and nuclear		Q	o	-	n
YCR014C	Nuclear	Cytosolic and nuclear		Q	o	M	n
YCR015C	-	Cytosolic and nuclear		Q	o	-	n
YCR016W	-	Cytosolic and nuclear		Q	o	-	n
YCR017C	Plasma memb	PM		S	i9-31o65-87i92-111o121-143i150-169o179-201i261-283o298-320i327-346o351-373i380-402o422-441i454-476o496-516i523-542o547-569i576-598o613-632i644-663o	S	n
YCR018C	Cytosolic and nuclear	Nuclear		Q	o	-	n
YCR018C-A	-	Cytosolic and nuclear		Q	i12-31o46-68i	S	n
YCR019W	-	Cytosolic and nuclear		Q	o	-	n
YCR020C	-	Cytosolic and nuclear		Q	o	-	n
YCR020C-A	-	Nuclear		Q	o	-	n
YCR020W-B	-	Cytosolic and nuclear		Q	i	-	n
YCR021C	-	ER memb		A	o34-56i63-85o122-144i156-178o184-201i214-233o248-270i	-	n
YCR022C	-	Cytosolic and nuclear		Q	o	-	n
YCR023C	-	PM		Q	i21-43o90-112i147-169o198-220i358-380o412-434i441-463o478-500i512-534o544-563i	-	n
YCR024C	-	Mito lumen		Q	o	M	n
YCR024C-A	Plasma memb	PM periphery (inside cell)		A	o5-27i	S	n
YCR025C	-	Cytosolic and nuclear		Q	o	-	n
YCR026C	-	ER periphery		Q	i114-136o	-	n
YCR027C	-	Cytosolic and nuclear		Q	o	M	n
YCR028C	-	PM		Q	i28-50o74-96i103-125o129-151i163-185o200-222i277-299o314-333i340-358o368-390i402-421o436-455i	-	n
YCR028C-A	Mito lumen	Mito lumen		Q	o	M	n
YCR030C	-	Cytosolic and nuclear		Q	o	-	n
YCR031C	-	Cytosolic and nuclear		Q	i	-	n
YCR032W	-	Cytosolic and nuclear		Q	o	-	n
YCR033W	-	Nuclear		Q	o	-	n
YCR034W	-	PM		Q	o68-90i97-119o123-142i147-169o197-219i232-254o274-296i	-	n
YCR035C	Cytosolic and nuclear	Cytosolic and nuclear		Q	o	-	n
YCR036W	Cytosolic and nuclear	Cytosolic and nuclear		Q	o	-	n
YCR037C	-	ER memb		Q	o458-475i496-518o538-560i591-613o628-647i668-690o710-729i736-758o768-790i803-834o849-871i892-914o	-	n
YCR038C	-	Cytosolic and nuclear		Q	o	-	n
YCR038W-A	-	Secreted and PM periphery (outside cell)		S	i	S	n
YCR039C	-	Nuclear		Q	o	-	n
YCR040W	-	Cytosolic and nuclear		Q	o	-	n
YCR041W	-	ER memb		Q	i21-40o55-77i90-109o	S	n
YCR042C	Nuclear	Nuclear		Q	o	M	n
YCR043C	-	ER periphery		Q	o75-97i	-	n
YCR044C	-	ER memb		S	i155-177o187-204i211-233o248-270i291-313o323-345i	S	n
YCR045C	-	Vacuole lumen		S	o	S	n
YCR046C	-	Mito lumen		Q	o	M	n
YCR047C	-	Cytosolic and nuclear		Q	o	-	n
YCR048W	ER memb	ER memb		Q	i188-210o230-252i265-287o291-313i370-392o407-429i450-472o533-555i587-609o	-	n
YCR049C	-	Mito lumen		Q	o	M	n
YCR050C	-	Cytosolic and nuclear		Q	i	-	n
YCR051W	-	Cytosolic and nuclear		Q	o	-	n
YCR052W	Nuclear	Nuclear		Q	o	-	n
YCR053W	-	Mito lumen		Q	o	M	n
YCR054C	-	Cytosolic and nuclear		Q	o	-	n
YCR055C	-	Cytosolic and nuclear		Q	o	-	n
YCR057C	-	Cytosolic and nuclear		Q	o	-	n
YCR059C	-	Cytosolic and nuclear		Q	o	-	n
YCR060W	-	Cytosolic and nuclear		Q	o	-	n
YCR061W	-	ER memb		S	i2-21o101-123i130-152o172-194i320-342o357-379i404-426o451-473i529-551o597-619i	S	n
YCR063W	-	Nuclear		Q	i	-	n
YCR064C	-	Secreted and PM periphery (outside cell)		S	o	S	y
YCR065W	Cytosolic and nuclear	Cytosolic and nuclear		Q	o	-	n
YCR066W	Nuclear	Nuclear		Q	o	-	n
YCR067C	-	Cytosolic and nuclear		Q	o	-	n
YCR068W	-	Golgi memb		A	i13-35o	S	n
YCR069W	Plasma memb periphery (outside cell)	Secreted and PM periphery (outside cell)		S	o	S	n
YCR071C	Mito lumen	Mito lumen		Q	o	M	n
YCR072C	-	Nuclear		Q	o	-	n
YCR073C	-	Nuclear		Q	o	-	n
YCR073W-A	Cytosolic	Cytosolic		Q	o	-	n
YCR075C	-	ER memb		Q	i7-25o40-62i83-105o118-140i185-207o227-246i	-	n
YCR076C	-	Cytosolic and nuclear		Q	o	-	n
YCR077C	-	Nuclear		Q	o	-	n
YCR079W	-	Mito lumen		Q	o	-	n
YCR081W	-	Cytosolic		Q	o	-	n
YCR082W	-	Cytosolic and nuclear		Q	o	-	n
YCR083W	Mito lumen	Mito lumen		Q	o	M	n
YCR084C	-	Cytosolic and nuclear		Q	o	-	n
YCR085W	-	Cytosolic and nuclear		Q	i83-105o	S	n
YCR086W	-	Cytosolic and nuclear		Q	o	-	n
YCR087C-A	-	Nuclear		Q	o	-	n
YCR087W	-	ER memb		Q	i80-102o117-136i141-160o	S	n
YCR088W	Cytosolic	Cytosolic		Q	o	-	n
YCR089W	-	Mito lumen		S	o	S	y
YCR090C	-	Cytosolic and nuclear		Q	o	S	n
YCR091W	-	Cytosolic and nuclear		Q	o	M	n
YCR092C	-	Nuclear		Q	o	-	n
YCR093W	Nuclear	Nuclear		Q	o	-	n
YCR094W	-	Cytosolic and nuclear		A	o45-67i330-352o	M	n
YCR095C	-	Cytosolic and nuclear		Q	o	-	n
YCR096C	-	Nuclear		Q	i	-	n
YCR097W	Nuclear	Nuclear		Q	i	-	n
YCR097W-A	-	Cytosolic and nuclear		Q	i27-46o61-83i	S	n
YCR098C	-	PM		Q	i46-68o88-110i117-139o183-205i218-237o276-298i310-327o337-356i363-380o395-417i429-451o	-	n
YCR099C	-	ER periphery		Q	o	-	n
YCR100C	-	Golgi periphery		Q	o	-	n
YCR101C	-	Secreted and PM periphery (outside cell)		S	o	S	n
YCR102C	-	Cytosolic		Q	o	-	n
YCR102W-A	-	Cytosolic and nuclear		Q	o	-	n
YCR104W	-	PM periphery (inside cell)		S	i7-29o	S	n
YCR105W	-	Cytosolic		Q	o	-	n
YCR106W	-	Nuclear		Q	o	-	n
YCR107W	-	Cytosolic		Q	o	-	n
YDL001W	Cytosolic	Cytosolic		Q	o401-423i	-	n
YDL002C	Nuclear	Nuclear		Q	o	-	n
YDL003W	Nuclear	Nuclear		Q	o	-	n
YDL004W	Mito lumen	Mito lumen		Q	o	M	n
YDL005C	-	Cytosolic and nuclear		Q	o	-	n
YDL006W	-	Mito lumen		Q	o	-	n
YDL007W	-	ER periphery		Q	o	-	n
YDL008W	-	Cytosolic and nuclear		Q	o	-	n
YDL009C	-	PM		Q	o53-75i	M	n
YDL010W	-	Mito lumen		S	i12-34o	S	n
YDL011C	-	Cytosolic and nuclear		Q	i84-106o	S	y
YDL012C	-	Cytosolic and nuclear		Q	o	-	n
YDL013W	-	Cytosolic and nuclear		Q	o	-	n
YDL014W	Nuclear	Nuclear		Q	o	-	n
YDL015C	-	PM		Q	i166-188o203-222i243-265o269-291i	-	n
YDL016C	-	Mito lumen		Q	o	M	n
YDL017W	-	Cytosolic and nuclear		Q	o	-	n
YDL018C	-	ER memb		S	o195-217i	S	n
YDL019C	Golgi periphery	Golgi periphery		Q	o	-	n
YDL020C	Nuclear	Nuclear		Q	o	-	n
YDL021W	Cytosolic	Cytosolic		Q	o	-	n
YDL022W	-	Mito lumen		Q	o	M	n
YDL023C	-	Cytosolic and nuclear		Q	o	-	n
YDL024C	-	Secreted and PM periphery (outside cell)		S	o	S	n
YDL025C	-	Cytosolic and nuclear		Q	o	-	n
YDL026W	-	ER memb		A	o43-62i69-91o	-	n
YDL027C	-	PM		Q	i123-145o149-169i	-	n
YDL028C	-	Cytosolic and nuclear		Q	o	-	n
YDL029W	-	Nuclear		Q	o	-	n
YDL030W	Nuclear	Nuclear		Q	o	-	n
YDL031W	Nuclear	Nuclear		Q	o	-	n
YDL032W	-	Cytosolic and nuclear		Q	o	S	n
YDL033C	-	Mito lumen		Q	o	M	n
YDL034W	-	Cytosolic and nuclear		Q	o	M	y
YDL035C	-	PM		Q	o57-79i92-114o134-156i179-198o251-273i620-642o	-	n
YDL036C	-	Cytosolic and nuclear		Q	o	M	n
YDL037C	-	Cytosolic and nuclear		Q	o	-	n
YDL038C	-	Cytosolic and nuclear		Q	o	-	n
YDL039C	-	Cytosolic and nuclear		Q	o	-	n
YDL040C	Cytosolic	Cytosolic and nuclear		Q	o	-	n
YDL041W	-	ER periphery		Q	o82-104i	-	n
YDL042C	Nuclear	Nuclear		Q	o	-	n
YDL043C	-	Nuclear		Q	o	-	n
YDL044C	-	Cytosolic and nuclear		Q	o	-	n
YDL045C	Cytosolic	Cytosolic		Q	o	-	n
YDL045W-A	-	Cytosolic		Q	o	-	n
YDL046W	-	ER lumen		S	i7-29o	S	n
YDL047W	Cytosolic	Cytosolic		Q	o	-	n
YDL048C	-	Nuclear		Q	o	-	n
YDL049C	Plasma memb periphery (outside cell)	Secreted and PM periphery (outside cell)		S	o	S	n
YDL050C	-	ER periphery		Q	i34-53o	-	n
YDL051W	-	Cytosolic and nuclear		Q	o	-	n
YDL052C	-	ER memb		A	i7-29o	S	n
YDL053C	-	Cytosolic and nuclear		Q	o	-	n
YDL054C	-	PM		A	o30-52i93-115o130-152i165-187o213-235i279-301o321-343i350-369o384-406i413-435o455-477i	M	n
YDL055C	-	Mito lumen		Q	o	M	n
YDL056W	Nuclear	Nuclear		Q	o	-	n
YDL057W	-	Cytosolic and nuclear		Q	o	-	n
YDL058W	-	Cytosolic		Q	o	-	n
YDL059C	Nuclear	Nuclear		Q	o	-	n
YDL060W	Nuclear	Nuclear		Q	o	-	n
YDL061C	-	Mito lumen		Q	o	M	n
YDL062W	-	Mito lumen		A	o	-	n
YDL063C	-	Cytosolic and nuclear		Q	o	-	n
YDL064W	-	Cytosolic		Q	o	-	n
YDL065C	Peroxisome lumen	Peroxisome lumen		Q	o	-	n
YDL066W	Mito lumen	Mito lumen		Q	o	M	n
YDL067C	Mito memb	Mito memb		S	o15-37i	S	n
YDL068W	-	Cytosolic and nuclear		Q	i32-51o66-88i	S	n
YDL069C	-	Mito lumen		Q	o	M	n
YDL070W	-	Nuclear		Q	o	M	n
YDL071C	-	Cytosolic and nuclear		Q	o	-	n
YDL072C	-	ER memb		S	i7-26o46-63i106-128o	S	n
YDL073W	-	Cytosolic and nuclear		Q	o	-	n
YDL074C	-	Cytosolic and nuclear		Q	o	-	n
YDL075W	-	Cytosolic and nuclear		Q	o	-	n
YDL076C	-	Nuclear		Q	o	-	n
YDL077C	-	Cytosolic		Q	o	-	n
YDL078C	Peroxisome lumen	Peroxisome lumen		Q	o	-	n
YDL079C	-	Cytosolic and nuclear		Q	o	-	n
YDL080C	Nuclear	Cytosolic and nuclear		Q	o	-	n
YDL081C	-	Cytosolic and nuclear		Q	o	-	n
YDL082W	-	Cytosolic and nuclear		Q	o	-	n
YDL083C	-	Mito lumen		Q	o	M	n
YDL084W	-	Nuclear		Q	o	-	n
YDL085C-A	-	Cytosolic and nuclear		Q	i	-	n
YDL085W	-	Mito lumen		Q	o	M	n
YDL086W	-	Cytosolic and nuclear		Q	o	-	n
YDL087C	-	Nuclear		Q	o	-	n
YDL088C	Cytosolic and nuclear	Cytosolic and nuclear		Q	o	M	n
YDL089W	-	PM		Q	i142-164o255-277i	-	n
YDL090C	-	Mito lumen		Q	o	M	n
YDL091C	-	ER periphery		Q	i55-77o	-	n
YDL092W	-	Nuclear		Q	o	-	n
YDL093W	-	ER memb		A	i47-64o93-115i128-150o154-176i181-199o231-253i265-287o585-607i620-642o652-674i681-698o	-	n
YDL094C	-	ER periphery		Q	o55-77i	-	n
YDL095W	ER memb	ER memb		Q	i51-70o139-161i181-203o235-254i274-296o589-611i623-642o657-679i686-708o	-	n
YDL096C	-	Cytosolic and nuclear		Q	o	-	n
YDL097C	-	ER periphery		Q	o	-	n
YDL098C	-	Nuclear		Q	o	-	n
YDL099W	-	Cytosolic and nuclear		Q	o	-	n
YDL100C	-	Nuclear		Q	o	-	n
YDL101C	Nuclear	Cytosolic		Q	o	-	n
YDL102W	Nuclear	Nuclear		Q	o	-	n
YDL103C	-	Cytosolic and nuclear		Q	o	-	n
YDL104C	-	Mito lumen		Q	o	M	n
YDL105W	-	Cytosolic and nuclear		Q	o	-	n
YDL106C	Nuclear	Nuclear		Q	o	-	n
YDL107W	-	Cytosolic and nuclear		Q	o	-	n
YDL108W	-	Cytosolic and nuclear		Q	o	-	n
YDL109C	-	Golgi periphery		Q	o	-	n
YDL110C	-	Cytosolic and nuclear		Q	o	-	n
YDL111C	Cytosolic	Cytosolic and nuclear		Q	o	-	n
YDL112W	-	Mito lumen		Q	o	-	n
YDL113C	-	Peroxisome lumen		Q	o	-	n
YDL114W	-	Peroxisome lumen		Q	o	-	n
YDL114W-A	-	Cytosolic and nuclear		Q	o	-	n
YDL115C	-	Nuclear		Q	o	-	n
YDL116W	Cytosolic and nuclear	Cytosolic and nuclear		Q	o	-	n
YDL117W	Plasma memb periphery (cytosolic side)	Cytosolic		Q	o	-	n
YDL118W	-	ER periphery		Q	o103-125i	-	n
YDL119C	-	Mito lumen		Q	o	-	n
YDL120W	Mito lumen	Mito lumen		Q	o	M	n
YDL121C	-	ER memb		A	i7-29o	S	n
YDL122W	-	Mito memb		A	i34-51o	-	n
YDL123W	-	ER memb		A	i7-29o39-61i	S	n
YDL124W	-	Cytosolic and nuclear		Q	o	-	n
YDL125C	-	Cytosolic and nuclear		Q	o	-	n
YDL126C	-	ER periphery		Q	o	-	n
YDL127W	-	Nuclear		Q	o	-	n
YDL128W	-	ER memb		Q	o31-53i60-82o92-114i127-146o161-183i204-226o253-275i288-310o320-342i349-371o381-398i	S	n
YDL129W	-	Cytosolic and nuclear		Q	o	-	n
YDL130W	-	Secreted and PM periphery (outside cell)		S	o	S	n
YDL130W-A	Mito lumen	Mito lumen		Q	i	M	n
YDL131W	-	Cytosolic		Q	o	-	n
YDL132W	-	Cytosolic and nuclear		Q	o	-	n
YDL133C-A	-	Cytosolic and nuclear		Q	i	-	n
YDL133W	-	PM		Q	o269-291i312-329o349-368i404-426o	-	n
YDL134C	-	Cytosolic		Q	o	-	n
YDL135C	Cytosolic	Cytosolic		Q	o	-	n
YDL136W	-	Mito lumen		Q	o	-	n
YDL137W	-	Golgi periphery		Q	o	-	n
YDL138W	-	PM		Q	i98-120o140-162i175-197o201-223i230-252o267-286i355-377o392-414i421-443o453-476i489-511o526-545i	-	n
YDL139C	-	Cytosolic and nuclear		Q	o	-	n
YDL140C	Nuclear	Nuclear		Q	o	-	n
YDL141W	-	Cytosolic and nuclear		Q	o	-	n
YDL142C	Mito memb	Mito memb		Q	i84-106o152-174i255-274o	M	n
YDL143W	Cytosolic	Cytosolic		Q	o	-	n
YDL144C	-	Mito lumen		A	i7-24o	S	n
YDL145C	Golgi periphery	Golgi periphery		S	o	M	n
YDL146W	-	Cytosolic and nuclear		Q	o	-	n
YDL147W	-	ER periphery		Q	o	-	n
YDL148C	Nuclear	Nuclear		Q	o	-	n
YDL149W	-	PM		Q	o316-338i373-395o536-558i620-642o652-671i725-747o	-	n
YDL150W	Nuclear	Nuclear		Q	o	-	n
YDL151C	-	Cytosolic and nuclear		S	o	M	y
YDL152W	-	Mito memb		Q	o65-84i	M	n
YDL153C	Nuclear	Nuclear		Q	o	-	n
YDL154W	-	Cytosolic and nuclear		Q	o	-	n
YDL155W	-	Nuclear		Q	o	-	n
YDL156W	-	Cytosolic		Q	o	-	n
YDL157C	-	Cytosolic and nuclear		Q	o	-	n
YDL158C	-	Cytosolic and nuclear		Q	o	S	n
YDL159W	-	Cytosolic and nuclear		Q	o	-	n
YDL159W-A	-	Cytosolic and nuclear		Q	i	-	n
YDL160C	-	Nuclear		Q	o	-	n
YDL161W	-	Cytosolic		Q	o	M	n
YDL162C	-	Cytosolic and nuclear		Q	o	-	n
YDL163W	-	Secreted and PM periphery (outside cell)		S	o	S	n
YDL164C	-	Mito lumen		S	o	M	n
YDL165W	Nuclear	Nuclear		Q	o	-	n
YDL166C	-	Cytosolic and nuclear		Q	o	-	n
YDL167C	-	Nuclear		Q	o	-	n
YDL168W	-	Cytosolic		Q	o	-	n
YDL169C	-	Cytosolic and nuclear		Q	o	-	n
YDL170W	Nuclear	Nuclear		Q	o	-	n
YDL171C	-	Cytosolic		Q	o	-	n
YDL172C	-	Cytosolic and nuclear		Q	i17-39o59-81i	S	n
YDL173W	-	Cytosolic and nuclear		Q	o	-	n
YDL174C	Mito lumen	Mito lumen		A	o	M	n
YDL175C	-	Nuclear		Q	o	-	n
YDL176W	-	Cytosolic and nuclear		Q	o	-	n
YDL177C	-	Cytosolic and nuclear		Q	o	-	n
YDL178W	Mito lumen	Mito lumen		Q	o	M	n
YDL179W	-	Nuclear		Q	o	-	n
YDL180W	-	Cytosolic and nuclear		A	i21-41o61-83i90-112o140-162i338-360o391-410i524-546o	S	y
YDL181W	Mito lumen	Mito lumen		Q	o	M	n
YDL182W	Cytosolic	Cytosolic		Q	o	-	n
YDL183C	-	Mito lumen		Q	o	M	n
YDL184C	-	Cytosolic and nuclear		Q	i	-	n
YDL185C-A	-	Mito lumen		A	o	S	n
YDL185W	-	Nuclear		Q	o	-	n
YDL186W	-	Cytosolic and nuclear		Q	o	-	n
YDL187C	-	Secreted and PM periphery (outside cell)		S	o	S	n
YDL188C	-	Cytosolic		Q	o	-	n
YDL189W	-	Nuclear		Q	o	-	n
YDL190C	-	Nuclear		Q	o	-	n
YDL191W	-	Mito lumen		Q	o	-	n
YDL192W	-	Golgi periphery		Q	o	-	n
YDL193W	-	ER memb		Q	i97-119o	-	n
YDL194W	-	PM		Q	i96-118o138-160i173-195o199-221i228-250o265-284i356-378o393-415i420-442o452-474i487-509o522-541i	-	n
YDL195W	-	ER periphery		Q	o	-	n
YDL196W	-	ER memb		A	i21-43o53-75i	S	n
YDL197C	-	Cytosolic and nuclear		Q	o	-	n
YDL198C	-	Mito lumen		Q	o	-	n
YDL199C	-	PM		Q	i119-141o161-183i196-218o222-244i257-279o289-311i409-431o441-460i467-489o504-526i533-552o	-	n
YDL200C	Nuclear	Nuclear		Q	o	-	n
YDL201W	-	Cytosolic and nuclear		Q	o	-	n
YDL202W	-	Mito lumen		Q	o	M	n
YDL203C	-	Cytosolic		Q	o	-	n
YDL204W	-	Mito memb		Q	i59-81o152-174i	M	n
YDL205C	-	Cytosolic and nuclear		Q	o	-	n
YDL206W	-	ER memb		S	o5-27i34-53o103-125i156-175o179-199i502-524o555-577i590-612o617-639i651-673o709-731i738-760o	S	y
YDL207W	Cytosolic and nuclear	Cytosolic and nuclear		Q	o	-	n
YDL208W	-	Nuclear		Q	o	-	n
YDL209C	-	Nuclear		Q	o	-	n
YDL210W	-	PM		Q	i79-101o111-133i154-176o201-223i230-249o274-293i314-336o365-387i414-436o481-503i516-533o	-	n
YDL211C	-	ER periphery		Q	o222-244i	-	n
YDL212W	-	ER memb		A	i7-29o62-84i97-116o136-158i	S	n
YDL213C	-	Nuclear		Q	o	-	n
YDL214C	-	Cytosolic and nuclear		Q	o	M	n
YDL215C	-	Cytosolic and nuclear		Q	o	-	n
YDL216C	-	ER periphery		Q	o	-	n
YDL217C	Mito memb	Mito memb		Q	i46-68o170-189i	-	n
YDL218W	-	ER memb		S	i7-29o44-66i71-93o135-157i	S	n
YDL219W	-	Cytosolic and nuclear		Q	o	-	n
YDL220C	-	Nuclear		Q	o	-	n
YDL221W	-	Cytosolic and nuclear		Q	o	-	n
YDL222C	-	ER memb		A	i7-29o112-134i147-169o189-211i	S	n
YDL223C	-	Cytosolic and nuclear		Q	o	-	n
YDL224C	-	Nuclear		Q	o	-	n
YDL225W	-	Nuclear		Q	o	-	n
YDL226C	-	Cytosolic		Q	o	-	n
YDL227C	-	Cytosolic and nuclear		Q	o	-	n
YDL228C	-	Mito lumen		Q	o	M	n
YDL229W	Cytosolic	Cytosolic		Q	o	-	n
YDL230W	Cytosolic	Cytosolic and nuclear		Q	o	-	n
YDL231C	-	PM		Q	i145-167o177-194i199-221o226-248i255-272o285-307i747-769o779-801i840-862o	-	n
YDL232W	-	ER memb		A	i7-29o	S	n
YDL233W	-	Cytosolic and nuclear		Q	o	-	n
YDL234C	-	Golgi periphery		Q	o	-	n
YDL235C	-	Cytosolic and nuclear		Q	o	-	n
YDL236W	-	PM periphery (inside cell)		Q	o	-	n
YDL237W	-	ER memb		A	i2-24o	S	n
YDL238C	-	Cytosolic and nuclear		Q	o	-	n
YDL239C	-	Cytosolic		Q	o	-	n
YDL240C-A	-	Secreted and PM periphery (outside cell)		S	o	S	n
YDL240W	Cytosolic	Cytosolic		Q	o	-	n
YDL241W	-	Cytosolic and nuclear		Q	o	-	n
YDL242W	-	Cytosolic and nuclear		Q	o	-	n
YDL243C	-	Cytosolic		Q	o	-	n
YDL244W	-	Cytosolic and nuclear		Q	o	-	n
YDL245C	-	PM		Q	i54-76o111-133i140-157o172-191i198-220o230-252i321-343o358-377i386-405o425-447i460-482o486-508i	-	n
YDL246C	-	Cytosolic		Q	o	-	n
YDL247W	-	PM		Q	i101-123o143-165i172-194o199-221i234-256o276-298i364-386o396-418i427-449o459-481i494-516o526-543i	-	n
YDL247W-A	-	Cytosolic and nuclear		Q	i	-	n
YDL248W	-	ER memb		Q	i46-63o73-95i228-246o256-275i	-	n
YDR001C	Cytosolic	Cytosolic		Q	o	M	n
YDR002W	Cytosolic and nuclear	Nuclear		Q	o	-	n
YDR003W	-	ER memb		A	o37-59i	-	n
YDR004W	-	Cytosolic and nuclear		Q	o	-	n
YDR005C	Cytosolic and nuclear	Nuclear		Q	o	-	n
YDR006C	Nuclear	Nuclear		Q	o	-	n
YDR007W	-	Cytosolic and nuclear		Q	o	-	n
YDR008C	-	Mito memb		Q	i20-42o	M	n
YDR009W	-	Cytosolic		Q	o	M	n
YDR010C	-	Cytosolic and nuclear		Q	o	-	n
YDR011W	-	PM		Q	o520-542i555-574o601-623i630-652o667-689i767-789o1187-1209i1214-1236o1274-1296i1303-1325o1335-1357i1455-1477o	M	n
YDR012W	-	Mito lumen		Q	o	-	n
YDR013W	-	Cytosolic and nuclear		Q	o	-	n
YDR014W	-	Mito lumen		Q	o	M	n
YDR015C	-	Secreted and PM periphery (outside cell)		Q	o	-	y
YDR016C	-	Cytosolic and nuclear		Q	o	-	n
YDR017C	-	Cytosolic and nuclear		Q	o	-	n
YDR018C	-	Mito memb		A	i31-53o68-87i124-143o372-391i	-	y
YDR019C	Mito lumen	Mito lumen		Q	o	-	n
YDR020C	-	Cytosolic and nuclear		Q	o	-	n
YDR021W	Nuclear	Nuclear		Q	o	-	n
YDR022C	-	Cytosolic and nuclear		Q	o	-	n
YDR023W	Cytosolic	Cytosolic		Q	o	-	n
YDR024W	-	Mito lumen		Q	o	M	n
YDR025W	-	Cytosolic and nuclear		Q	o	-	n
YDR026C	-	Nuclear		Q	o	-	n
YDR027C	-	Golgi periphery		Q	o	-	n
YDR028C	Nuclear	Nuclear		Q	o	-	n
YDR029W	-	PM		Q	o43-65i70-92o	-	n
YDR030C	-	Cytosolic		Q	o	-	n
YDR031W	-	Cytosolic		Q	o	-	n
YDR032C	Plasma memb periphery (outside cell)	Secreted and PM periphery (outside cell)		S	o	S	n
YDR033W	-	ER memb		A	i35-54o69-91i112-134o139-161i168-190o203-225i238-260o	-	n
YDR034C	Nuclear	Nuclear		Q	o	-	n
YDR034C-A	-	Cytosolic and nuclear		Q	i5-27o	S	n
YDR034C-C	-	Cytosolic and nuclear		Q	o	-	n
YDR034C-D	-	Cytosolic and nuclear		Q	o	-	n
YDR034W-B	-	Cytosolic and nuclear		Q	i	-	y
YDR035W	-	Cytosolic and nuclear		Q	o	-	n
YDR036C	-	Mito lumen		Q	o	M	n
YDR037W	Cytosolic	Cytosolic and nuclear		Q	o	-	n
YDR038C	Plasma memb	PM		Q	i65-87o91-110i286-303o313-335i815-837o852-869i897-919o939-961i990-1012o1022-1044i	-	n
YDR039C	Plasma memb	PM		Q	i65-87o91-110i286-303o313-335i815-837o852-869i897-919o939-961i990-1012o1022-1044i	-	n
YDR040C	Plasma memb	PM		Q	i65-87o91-110i286-303o313-335i815-837o852-869i897-919o939-961i990-1012o1022-1044i	-	n
YDR041W	-	Mito lumen		Q	o	M	n
YDR042C	-	Cytosolic and nuclear		Q	o	-	n
YDR043C	-	Nuclear		Q	o	-	n
YDR044W	Cytosolic	Cytosolic		Q	o	-	n
YDR045C	-	Nuclear		Q	o	-	n
YDR046C	-	PM		Q	i94-113o117-139i167-189o204-223i236-258o284-306i327-344o373-395i423-440o450-472i493-515o530-552i	-	n
YDR047W	Cytosolic	Cytosolic		Q	o	-	n
YDR048C	-	ER memb		S	o74-96i	S	n
YDR049W	-	Cytosolic and nuclear		Q	o	-	n
YDR050C	-	Cytosolic and nuclear		Q	o	-	n
YDR051C	-	Cytosolic		Q	o	-	n
YDR052C	-	Nuclear		Q	o	-	n
YDR053W	-	ER memb		S	i7-29o33-55i108-130o	S	n
YDR054C	Nuclear	Cytosolic and nuclear		Q	o	M	n
YDR055W	Plasma memb periphery (outside cell)	Secreted and PM periphery (outside cell)		S	o	S	n
YDR056C	-	Secreted and PM periphery (outside cell)		S	o	S	n
YDR057W	-	ER lumen		S	o	S	n
YDR058C	-	Vacuole lumen		Q	o	-	n
YDR059C	-	Cytosolic and nuclear		Q	o	-	n
YDR060W	-	Nuclear		Q	o	-	n
YDR061W	-	Mito lumen		Q	o	M	n
YDR062W	-	Cytosolic		Q	o	-	n
YDR063W	-	Cytosolic		Q	o	-	n
YDR064W	-	Mito lumen		Q	o	M	n
YDR065W	-	Mito lumen		Q	o	M	n
YDR066C	-	Cytosolic and nuclear		Q	o	-	n
YDR067C	-	Mito lumen		Q	o	M	n
YDR068W	-	Nuclear		Q	o	-	n
YDR069C	-	ER periphery		Q	o	-	n
YDR070C	-	Mito lumen		Q	o	M	n
YDR071C	-	Cytosolic and nuclear		Q	o	-	n
YDR072C	-	Mito memb		Q	i23-45o95-117i152-174o189-211i224-246o289-311i435-454o464-483i	M	n
YDR073W	-	Nuclear		Q	o	-	n
YDR074W	-	Cytosolic		Q	o	-	n
YDR075W	-	Cytosolic		Q	o	-	n
YDR076W	-	Nuclear		Q	o	-	n
YDR077W	-	Secreted and PM periphery (outside cell)		S	o	S	n
YDR078C	-	Cytosolic and nuclear		Q	o	-	n
YDR079C-A	-	Cytosolic and nuclear		Q	i	-	n
YDR079W	-	Mito lumen		A	o	M	n
YDR080W	-	Vacuole lumen		Q	o	-	n
YDR081C	-	Nuclear		Q	o	-	n
YDR082W	-	Cytosolic and nuclear		Q	o	-	n
YDR083W	-	Cytosolic and nuclear		Q	o	-	n
YDR084C	-	ER memb		Q	i31-53o109-131i133-152o	S	n
YDR085C	-	Cytosolic and nuclear		Q	o	-	n
YDR086C	-	ER memb		Q	i53-75o	-	n
YDR087C	Nuclear	Cytosolic and nuclear		Q	o	-	n
YDR088C	-	Nuclear		Q	o	-	n
YDR089W	-	PM		Q	o776-798i811-833o843-865i	-	n
YDR090C	-	ER memb		S	i7-29o44-66i97-119o129-151i163-185o189-211i	S	n
YDR091C	-	Cytosolic and nuclear		Q	o	-	n
YDR092W	-	Cytosolic and nuclear		Q	o	-	n
YDR093W	-	PM		Q	o259-293i598-620o644-666i1234-1251o1261-1283i1313-1335o1350-1372i1379-1400o1415-1437i	-	n
YDR094W	-	Mito lumen		S	i	M	n
YDR095C	-	Mito lumen		Q	o	M	n
YDR096W	Nuclear	Nuclear		Q	o	-	n
YDR097C	-	Cytosolic and nuclear		Q	o	-	n
YDR098C	-	Cytosolic and nuclear		Q	o	-	n
YDR098C-A	-	Cytosolic and nuclear		Q	o	-	n
YDR098C-B	-	Cytosolic and nuclear		Q	o	-	n
YDR099W	-	Cytosolic		Q	o	-	n
YDR100W	-	Mito lumen		Q	o30-52i65-87o91-113i	S	n
YDR101C	-	Cytosolic and nuclear		Q	o	-	n
YDR102C	-	Cytosolic and nuclear		Q	o	-	n
YDR103W	Cytosolic	Cytosolic and nuclear		Q	o	-	n
YDR104C	-	Cytosolic and nuclear		Q	o	-	n
YDR105C	-	ER memb		S	i7-29o39-61i82-104o119-138i145-167o195-217i229-246o296-318i399-421o436-458i	S	n
YDR106W	-	Cytosolic and nuclear		Q	o	-	n
YDR107C	-	Mito memb		S	i310-332o378-400i407-429o444-466i479-501o536-558i565-587o602-621i634-656o	S	n
YDR108W	-	Cytosolic and nuclear		Q	o	-	n
YDR109C	-	Mito lumen		Q	o	M	n
YDR110W	-	Cytosolic and nuclear		Q	o	-	n
YDR111C	-	Peroxisome lumen		Q	o	-	n
YDR112W	-	ER memb		S	i21-43o58-80i	S	n
YDR113C	Cytosolic and nuclear	Nuclear		Q	o	-	n
YDR114C	-	Mito memb		Q	o69-88i	-	y
YDR115W	-	Mito lumen		S	o	M	n
YDR116C	Mito lumen	Mito lumen		Q	o	-	n
YDR117C	-	Cytosolic and nuclear		Q	o	-	n
YDR118W	Cytosolic and nuclear	Nuclear		Q	o	-	n
YDR119W	-	PM		Q	i251-273o283-305i312-331o335-357i373-392o407-429i454-473o483-502i523-552o562-581i588-610o620-639i652-674o739-758i	-	n
YDR120C	-	Mito lumen		Q	o	M	n
YDR121W	-	Nuclear		Q	o	-	n
YDR122W	-	Cytosolic and nuclear		Q	o	-	n
YDR123C	-	Nuclear		Q	o	-	n
YDR124W	-	Cytosolic and nuclear		Q	o	-	n
YDR125C	Mito lumen	Mito lumen		Q	o	M	n
YDR126W	-	ER memb		S	i5-27o47-69i82-104o176-198i211-233o	S	n
YDR127W	Cytosolic	Cytosolic		Q	o	-	n
YDR128W	-	Cytosolic and nuclear		Q	o	-	n
YDR129C	-	Cytosolic		Q	o	-	n
YDR130C	Cytosolic and nuclear	Cytosolic and nuclear		Q	o	-	n
YDR131C	-	Cytosolic and nuclear		Q	o	-	n
YDR132C	-	Cytosolic and nuclear		Q	o	-	n
YDR133C	-	Mito memb		Q	o64-86i	M	n
YDR134C	-	Secreted and PM periphery (outside cell)		S	o	S	n
YDR135C	-	ER memb		Q	o28-50i71-93o103-122i129-148o163-185i346-368o447-466i530-552o567-589i950-972o992-1014i1062-1084o1089-1106i1175-1197o	-	n
YDR136C	-	Mito memb		Q	i152-174o	M	n
YDR137W	-	Cytosolic and nuclear		Q	o	-	n
YDR138W	-	Nuclear		Q	o	-	n
YDR139C	-	Cytosolic and nuclear		Q	o	-	n
YDR140W	-	Cytosolic and nuclear		Q	o	-	n
YDR141C	-	Cytosolic and nuclear		Q	o	-	n
YDR142C	Cytosolic	Cytosolic		Q	o	M	n
YDR143C	-	Cytosolic and nuclear		Q	o	-	n
YDR144C	Plasma memb periphery (outside cell)	Secreted and PM periphery (outside cell)		S	o	S	y
YDR145W	Nuclear	Nuclear		Q	o	-	n
YDR146C	Cytosolic and nuclear	Cytosolic and nuclear		Q	o	-	n
YDR147W	-	Cytosolic		Q	o	-	n
YDR148C	Mito lumen	Mito lumen		Q	o	M	n
YDR149C	-	Mito lumen		Q	o	M	n
YDR150W	-	Golgi periphery		Q	o	-	n
YDR151C	-	Cytosolic and nuclear		Q	o	-	n
YDR152W	-	Cytosolic and nuclear		Q	o	-	n
YDR153C	-	Cytosolic		Q	o	-	n
YDR154C	-	Cytosolic and nuclear		Q	i	-	n
YDR155C	Cytosolic	Cytosolic		Q	o	-	n
YDR156W	Nuclear	Cytosolic and nuclear		Q	o	M	n
YDR157W	-	Cytosolic and nuclear		Q	o	S	n
YDR158W	-	Mito lumen		Q	o	-	n
YDR159W	-	Cytosolic and nuclear		Q	o	-	n
YDR160W	-	PM		Q	i288-310o325-347i359-381o396-415i422-444o500-522i542-561o633-655i675-694o709-731i754-776o786-805i	-	n
YDR161W	-	Cytosolic and nuclear		Q	o	-	n
YDR162C	-	Cytosolic		Q	o	-	n
YDR163W	-	Cytosolic and nuclear		Q	o	-	n
YDR164C	-	Golgi periphery		Q	o	-	n
YDR165W	-	Cytosolic and nuclear		Q	o	-	n
YDR166C	-	Cytosolic and nuclear		Q	o	-	n
YDR167W	Nuclear	Nuclear		Q	o	-	n
YDR168W	Cytosolic	Cytosolic		Q	o	-	n
YDR169C	-	Nuclear		Q	o	-	n
YDR170C	Golgi periphery	Golgi periphery		Q	o	-	n
YDR170W-A	-	Cytosolic and nuclear		Q	o	-	n
YDR171W	-	Nuclear		Q	o	-	n
YDR172W	-	Cytosolic		Q	o	-	n
YDR173C	-	Nuclear		Q	o	-	n
YDR174W	Nuclear	Nuclear		Q	o	-	n
YDR175C	-	Mito lumen		Q	o	M	n
YDR176W	-	Nuclear		Q	o	-	n
YDR177W	-	Cytosolic and nuclear		Q	o	-	n
YDR178W	Mito memb	Mito memb		Q	i74-96o132-149i	M	n
YDR179C	-	ER periphery		Q	o	-	n
YDR179W-A	-	Secreted and PM periphery (outside cell)		Q	o	-	y
YDR180W	Nuclear	Cytosolic and nuclear		Q	o	-	n
YDR181C	Nuclear	Nuclear		Q	o	-	n
YDR182W	-	Cytosolic and nuclear		A	i42-64o394-416i468-490o	-	n
YDR183W	Cytosolic	Cytosolic and nuclear		Q	o	-	n
YDR184C	-	Cytosolic and nuclear		Q	o	-	n
YDR185C	-	Cytosolic and nuclear		Q	o	-	n
YDR186C	-	Cytosolic and nuclear		Q	o	-	n
YDR187C	-	Mito memb		S	i110-132o	M	n
YDR188W	Cytosolic	Cytosolic		Q	o	-	n
YDR189W	-	Golgi periphery		Q	o	-	n
YDR190C	-	Cytosolic and nuclear		Q	o	-	n
YDR191W	-	Nuclear		Q	o	-	n
YDR192C	Cytosolic and nuclear	Cytosolic and nuclear		Q	o	-	n
YDR193W	-	Cytosolic and nuclear		Q	o	S	n
YDR194C	Mito lumen	Nuclear		Q	o	M	n
YDR195W	-	Nuclear		Q	o	-	n
YDR196C	-	Cytosolic and nuclear		Q	o	-	n
YDR197W	Mito lumen	Mito lumen		Q	o	M	n
YDR198C	-	Cytosolic and nuclear		Q	o	-	n
YDR199W	-	Cytosolic and nuclear		Q	o	S	n
YDR200C	-	Nuclear		Q	o	-	n
YDR201W	-	Cytosolic and nuclear		Q	o	-	n
YDR202C	-	Nuclear		Q	o	-	n
YDR203W	-	Secreted and PM periphery (outside cell)		S	o	S	y
YDR204W	Mito lumen	Mito lumen		A	o	M	n
YDR205W	ER memb	ER memb		Q	i21-43o73-95i107-129o149-171i191-213o235-257i264-281o313-335i404-421o436-453i466-488o508-530i543-565o580-602i	-	n
YDR206W	-	Nuclear		Q	o	-	n
YDR207C	Nuclear	Nuclear		Q	o	-	n
YDR208W	-	Mito lumen		Q	o	M	n
YDR209C	-	Cytosolic and nuclear		Q	o	-	n
YDR210C-C	-	Cytosolic and nuclear		Q	o	-	n
YDR210C-D	-	Cytosolic and nuclear		Q	o	-	n
YDR210W	-	Cytosolic and nuclear		Q	i	-	n
YDR210W-A	-	Cytosolic and nuclear		Q	o	-	n
YDR210W-B	-	Cytosolic and nuclear		Q	o	-	n
YDR211W	-	Cytosolic and nuclear		Q	o	-	n
YDR212W	Cytosolic	Cytosolic		Q	o	-	n
YDR213W	-	Cytosolic and nuclear		Q	o	-	n
YDR214W	Cytosolic	Cytosolic		Q	o	-	n
YDR215C	-	Cytosolic and nuclear		Q	o	-	n
YDR216W	Nuclear	Cytosolic and nuclear		Q	o	-	n
YDR217C	Nuclear	Nuclear		Q	o	-	n
YDR218C	-	Nuclear		Q	o	-	n
YDR219C	-	Cytosolic and nuclear		Q	o	-	n
YDR220C	-	Cytosolic and nuclear		Q	o	-	n
YDR221W	-	Nuclear		S	o	S	n
YDR222W	-	Cytosolic and nuclear		Q	o	-	n
YDR223W	-	Mito lumen		Q	o	M	n
YDR224C	Nuclear	Nuclear		Q	o	-	n
YDR225W	Nuclear	Nuclear		Q	o	M	n
YDR226W	Cytosolic	Cytosolic and nuclear		Q	o	-	n
YDR227W	Nuclear	Cytosolic and nuclear		Q	o	-	n
YDR228C	-	Nuclear		Q	o	-	n
YDR229W	-	Nuclear		Q	o	-	n
YDR230W	-	Mito lumen		S	o	M	n
YDR231C	-	Nuclear		Q	o	-	n
YDR232W	Mito lumen	Mito lumen		S	o	M	n
YDR233C	-	PM		Q	i51-73o143-165i	-	n
YDR234W	-	Mito lumen		Q	o	M	n
YDR235W	-	Nuclear		Q	o	-	n
YDR236C	-	Mito lumen		S	o4-21i	S	n
YDR237W	Mito lumen	Mito lumen		Q	o	M	n
YDR238C	-	Golgi periphery		Q	o	-	n
YDR239C	-	Cytosolic and nuclear		Q	o	-	n
YDR240C	-	Nuclear		Q	o	M	n
YDR241W	-	Mito memb		Q	i21-43o68-87i	M	n
YDR242W	-	Cytosolic and nuclear		Q	o	-	n
YDR243C	Nuclear	Nuclear		Q	o	-	n
YDR244W	Peroxisome periphery	Peroxisome lumen		Q	o	-	n
YDR245W	Golgi memb	Golgi memb		A	i53-72o	-	n
YDR246W	-	Golgi periphery		Q	o	-	n
YDR247W	Cytosolic	Cytosolic and nuclear		Q	o	-	n
YDR248C	-	Cytosolic and nuclear		Q	o	-	n
YDR249C	-	Mito lumen		Q	o	M	n
YDR250C	-	Cytosolic and nuclear		Q	i12-34o	S	n
YDR251W	-	Mito lumen		Q	o	-	n
YDR252W	-	Nuclear		Q	o	-	n
YDR253C	-	Nuclear		Q	o	-	n
YDR254W	-	Cytosolic and nuclear		Q	o	-	n
YDR255C	-	ER periphery		Q	o301-323i	-	n
YDR256C	Peroxisome lumen	Peroxisome lumen		Q	o	-	n
YDR257C	Nuclear	Nuclear		Q	o	-	n
YDR258C	Mito lumen	Mito lumen		Q	o	M	n
YDR259C	Nuclear	Nuclear		Q	o	-	n
YDR260C	-	Cytosolic and nuclear		Q	o	-	n
YDR261C	-	Secreted and PM periphery (outside cell)		S	o	S	y
YDR261C-C	-	Cytosolic and nuclear		Q	o	-	n
YDR261C-D	-	Cytosolic and nuclear		Q	o	-	n
YDR261W-A	-	Cytosolic and nuclear		Q	o	-	n
YDR261W-B	-	Cytosolic and nuclear		Q	o	-	n
YDR262W	-	Secreted and PM periphery (outside cell)		S	o	S	y
YDR263C	-	Nuclear		Q	o	-	n
YDR264C	-	Cytosolic		Q	o337-359i380-402o417-439i515-537o570-592i	-	n
YDR265W	Peroxisome memb	Peroxisome memb		Q	i102-124o	-	n
YDR266C	-	Nuclear		Q	o	-	n
YDR267C	-	Cytosolic and nuclear		Q	o	-	n
YDR268W	Mito lumen	Mito lumen		Q	o	M	n
YDR269C	-	ER periphery		Q	i83-105o	-	n
YDR270W	-	Cytosolic		S	i262-284o304-326i339-361o371-393i526-548o568-590i902-924o928-950i	-	n
YDR271C	-	Cytosolic and nuclear		Q	i	-	n
YDR272W	Cytosolic	Cytosolic		Q	o	-	n
YDR273W	-	Cytosolic		Q	o	-	n
YDR274C	-	Cytosolic and nuclear		Q	o	-	n
YDR275W	-	ER periphery		Q	i66-88o	-	n
YDR276C	-	ER memb		S	i7-26o31-53i	S	n
YDR277C	-	Mito lumen		Q	o	M	n
YDR278C	-	Mito memb		Q	i54-76o	M	n
YDR279W	-	Cytosolic and nuclear		Q	o	-	n
YDR280W	Cytosolic and nuclear	Cytosolic and nuclear		Q	o	-	n
YDR281C	-	ER periphery		Q	i75-97o	-	n
YDR282C	-	Cytosolic		Q	o	M	n
YDR283C	-	Cytosolic		Q	o	-	n
YDR284C	vacuole memb	Vacuole memb		Q	i21-38o65-87i92-114o201-218i225-247o	S	n
YDR285W	-	Cytosolic and nuclear		Q	o	M	n
YDR286C	-	Mito lumen		Q	i	M	n
YDR287W	-	Cytosolic and nuclear		Q	o	-	n
YDR288W	-	Cytosolic and nuclear		Q	o	-	n
YDR289C	-	Cytosolic and nuclear		Q	o	-	n
YDR290W	-	Cytosolic and nuclear		Q	o63-85i	S	n
YDR291W	-	Nuclear		Q	o	-	n
YDR292C	-	ER periphery		Q	o	-	n
YDR293C	-	Cytosolic and nuclear		Q	o	-	n
YDR294C	-	Cytosolic and nuclear		Q	o	-	n
YDR295C	-	Nuclear		Q	o	-	n
YDR296W	-	Nuclear		Q	o	-	n
YDR297W	-	Mito memb		Q	i7-29o49-70i97-119o146-168i	M	n
YDR298C	Mito lumen	Mito lumen		S	o	M	n
YDR299W	-	Nuclear		Q	o	-	n
YDR300C	Cytosolic	Cytosolic and nuclear		Q	o	-	n
YDR301W	-	Cytosolic and nuclear		Q	o	-	n
YDR302W	-	PM		Q	i105-127o137-159i171-188o198-217i	-	n
YDR303C	Nuclear	Nuclear		Q	o	-	n
YDR304C	ER lumen	Secreted and PM periphery (outside cell)		S	o	S	n
YDR305C	-	Cytosolic and nuclear		Q	o	-	n
YDR306C	-	Nuclear		Q	o	-	n
YDR307W	-	ER memb		Q	i30-47o106-123i162-184o194-216i236-258o	-	n
YDR308C	-	Nuclear		Q	o	-	n
YDR309C	-	PM periphery (inside cell)		Q	o	-	n
YDR310C	Nuclear	Nuclear		Q	o	-	n
YDR311W	Nuclear	Nuclear		Q	o	-	n
YDR312W	Nuclear	Nuclear		Q	o	-	n
YDR313C	-	Cytosolic and nuclear		Q	o	-	n
YDR314C	-	Nuclear		Q	o	-	n
YDR315C	-	Cytosolic and nuclear		Q	o	-	n
YDR316W	-	Mito memb		Q	i104-123o	M	n
YDR316W-A	-	Cytosolic and nuclear		Q	o	-	n
YDR316W-B	-	Cytosolic and nuclear		Q	o	-	n
YDR317W	-	Cytosolic and nuclear		Q	o	-	n
YDR318W	-	Nuclear		Q	o	-	n
YDR319C	-	ER memb		A	i13-35o50-72i125-147o175-197i217-236o246-268i	S	n
YDR320C	-	Cytosolic		Q	o	-	n
YDR320C-A	-	Cytosolic and nuclear		Q	o	-	n
YDR321W	Cytosolic	Cytosolic		Q	o	-	n
YDR322C-A	-	Mito lumen		Q	o	M	n
YDR322W	Mito lumen	Mito lumen		Q	o	M	n
YDR323C	-	Nuclear		Q	o	-	n
YDR324C	-	Cytosolic and nuclear		Q	o	M	n
YDR325W	Cytosolic and nuclear	Cytosolic and nuclear		Q	o	-	n
YDR326C	-	ER periphery		Q	o1280-1302i	-	n
YDR327W	-	Cytosolic and nuclear		Q	o	S	n
YDR328C	Nuclear	Nuclear		Q	o	-	n
YDR329C	Peroxisome memb	Peroxisome memb		A	i17-39o	M	n
YDR330W	-	Cytosolic and nuclear		Q	o	-	n
YDR331W	ER memb	ER memb		S	o380-397i	S	n
YDR332W	-	Nuclear		Q	o	M	n
YDR333C	-	Cytosolic and nuclear		Q	o	-	n
YDR334W	-	Nuclear		Q	o	-	n
YDR335W	-	Cytosolic and nuclear		Q	o	-	n
YDR336W	-	Cytosolic		Q	o	-	n
YDR337W	Mito lumen	Mito lumen		Q	o	M	n
YDR338C	-	PM		Q	o236-258i265-287o307-329i350-364o379-401i408-430o486-508i529-551o603-625i630-652o	-	n
YDR339C	-	Cytosolic and nuclear		Q	o	-	n
YDR340W	-	ER periphery		Q	o28-45i	-	n
YDR341C	Cytosolic	Cytosolic		Q	o	-	n
YDR342C	-	PM		Q	o59-81i117-134o144-163i170-192o202-224i237-256o359-381i388-410o430-452i464-486o490-512i	-	n
YDR343C	-	PM		Q	o59-81i117-134o144-163i170-192o202-224i237-256o359-381i388-410o430-452i464-486o490-512i	-	n
YDR344C	-	Cytosolic and nuclear		Q	o	S	n
YDR345C	-	PM		Q	o59-78i114-131o141-160i167-189o199-221i234-253o356-378i385-407o427-449i461-483o487-509i	-	n
YDR346C	-	Cytosolic and nuclear		Q	o	-	n
YDR347W	Mito lumen	Mito lumen		Q	o	M	n
YDR348C	-	Mito lumen		Q	o	M	n
YDR349C	-	Secreted and PM periphery (outside cell)		S	o	S	y
YDR350C	-	Cytosolic and nuclear		Q	o	-	n
YDR351W	-	Cytosolic and nuclear		Q	o	-	n
YDR352W	-	ER memb		Q	o6-28i40-62o72-94i215-237o257-279i	S	n
YDR353W	Cytosolic	Cytosolic		Q	o	-	n
YDR354W	-	Cytosolic and nuclear		Q	o	-	n
YDR355C	-	Mito lumen		S	o	-	n
YDR356W	Nuclear	Nuclear		Q	o	-	n
YDR357C	-	Cytosolic and nuclear		Q	o	-	n
YDR358W	-	Cytosolic and nuclear		Q	o	-	n
YDR359C	-	Nuclear		Q	o	-	n
YDR360W	-	Cytosolic and nuclear		Q	o	M	y
YDR361C	-	Cytosolic and nuclear		Q	o	-	n
YDR362C	-	Nuclear		Q	o	-	n
YDR363W	-	Nuclear		Q	o	-	n
YDR363W-A	-	Cytosolic and nuclear		Q	i	-	n
YDR364C	Nuclear	Nuclear		Q	o	-	n
YDR365C	-	Mito lumen		Q	o	-	n
YDR365W-A	-	Cytosolic and nuclear		Q	o	-	n
YDR365W-B	-	Cytosolic and nuclear		Q	o	-	n
YDR366C	-	ER memb		S	o4-26i80-99o114-131i	S	y
YDR367W	-	ER memb		S	i12-31o51-73i80-102o153-175i	S	n
YDR368W	Cytosolic	Cytosolic		Q	o	-	n
YDR369C	-	Nuclear		Q	o	-	n
YDR370C	-	Cytosolic and nuclear		Q	o	-	n
YDR371W	-	ER memb		A	i12-34o	S	n
YDR372C	-	Mito lumen		Q	o	M	n
YDR373W	-	Cytosolic and nuclear		Q	o	-	n
YDR374C	-	Cytosolic and nuclear		Q	o	-	n
YDR375C	Mito periphery	ER memb		Q	o51-73i	-	n
YDR376W	Mito lumen	Mito lumen		Q	o	M	n
YDR377W	-	Mito lumen		Q	o	M	n
YDR378C	Nuclear	Nuclear		Q	i	M	n
YDR379C-A	-	Mito lumen		Q	o	M	n
YDR379W	-	Cytosolic		Q	o	-	n
YDR380W	Cytosolic	Cytosolic		Q	o462-484i	-	n
YDR381C-A	-	ER periphery		Q	o13-31i	-	n
YDR381W	Nuclear	Nuclear		Q	o	-	n
YDR382W	-	Vacuole periphery		S	o	S	n
YDR383C	-	Cytosolic and nuclear		Q	o	-	n
YDR384C	-	PM		Q	i85-107o117-139i144-163o178-199i206-228o238-257i	-	n
YDR385W	Cytosolic	Cytosolic and nuclear		Q	o	-	n
YDR386W	Nuclear	Nuclear		Q	o	-	n
YDR387C	-	PM		Q	i43-65o85-104i111-133o137-159i166-188o198-220i348-370o385-407i414-436o441-463i475-497o507-526i	-	n
YDR388W	-	Cytosolic		Q	o	M	n
YDR389W	-	Cytosolic		Q	o	-	n
YDR390C	Nuclear	Nuclear		Q	o	-	n
YDR391C	-	Cytosolic and nuclear		Q	o	-	n
YDR392W	-	Nuclear		Q	o	-	n
YDR393W	-	Mito memb		Q	i295-317o	M	n
YDR394W	-	ER periphery		Q	o	-	n
YDR395W	-	Cytosolic and nuclear		Q	o	-	n
YDR396W	-	Secreted and PM periphery (outside cell)		S	o	S	y
YDR397C	-	Nuclear		Q	o	-	n
YDR398W	-	Cytosolic and nuclear		Q	o	-	n
YDR399W	-	Nuclear		Q	o	-	n
YDR400W	-	Cytosolic and nuclear		Q	o	-	n
YDR401W	-	Mito lumen		Q	o	M	n
YDR402C	-	ER lumen		S	i7-29o	S	n
YDR403W	-	Cytosolic and nuclear		Q	o	-	n
YDR404C	Nuclear	Nuclear		Q	o	-	n
YDR405W	Mito lumen	Mito lumen		Q	o	-	n
YDR406W	-	PM		Q	o532-554i567-589o614-636i641-663o673-695i700-722o784-803i1221-1240o1305-1327i1339-1361o1371-1393i1492-1514o	-	n
YDR407C	-	Golgi periphery		Q	o	M	n
YDR408C	-	Mito lumen		S	o	-	n
YDR409W	-	Nuclear		Q	o	-	n
YDR410C	-	ER memb		A	o20-42i49-68o88-105i112-134o180-202i	-	n
YDR411C	ER memb	ER memb		Q	o36-58i123-145o171-193i200-222o	-	n
YDR412W	-	Cytosolic		Q	o	-	n
YDR413C	-	ER memb		A	i13-35o45-67i168-190o	S	n
YDR414C	ER memb	ER memb		A	o25-44i78-100o110-130i	-	n
YDR415C	-	Secreted and PM periphery (outside cell)		S	o	S	y
YDR416W	-	Nuclear		Q	o	-	n
YDR417C	-	ER memb		S	o4-23i36-58o97-119i	S	y
YDR418W	-	Mito lumen		Q	o	-	n
YDR419W	-	Cytosolic and nuclear		Q	o	-	n
YDR420W	-	ER memb		S	o1486-1508i	S	n
YDR421W	Nuclear	Nuclear		Q	o	M	n
YDR422C	-	PM periphery (inside cell)		Q	o	-	n
YDR423C	Cytosolic and nuclear	Cytosolic and nuclear		Q	o	-	n
YDR424C	Cytosolic	Cytosolic		Q	o	-	n
YDR425W	-	Cytosolic		Q	o	-	n
YDR426C	-	Cytosolic and nuclear		Q	o	-	n
YDR427W	-	ER periphery		Q	o	-	n
YDR428C	-	Cytosolic and nuclear		Q	o	-	n
YDR429C	-	Nuclear		Q	o	-	n
YDR430C	-	Mito lumen		Q	o	M	n
YDR431W	-	ER memb		A	o36-58i	-	n
YDR432W	Nuclear	Nuclear		Q	o	-	n
YDR433W	-	Cytosolic and nuclear		Q	o	-	n
YDR434W	-	ER memb		A	i9-27o473-495i	S	n
YDR435C	-	Cytosolic and nuclear		Q	o	-	n
YDR436W	-	Cytosolic		Q	o	-	n
YDR437W	-	ER memb		A	i7-29o53-75i	S	n
YDR438W	-	ER memb		S	i12-34o44-66i122-144o148-170i175-192o202-221i241-263o273-290i297-319o329-348i	S	n
YDR439W	-	Cytosolic and nuclear		Q	o	-	n
YDR440W	-	Cytosolic and nuclear		Q	o	-	n
YDR441C	Cytosolic	Cytosolic		Q	o	-	n
YDR442W	-	ER periphery		Q	i21-43o	-	n
YDR443C	-	Nuclear		Q	o	-	n
YDR444W	-	Golgi periphery		Q	o	-	n
YDR445C	-	Cytosolic and nuclear		Q	o51-73i	S	n
YDR446W	-	Cytosolic and nuclear		Q	o	-	n
YDR447C	-	Mito lumen		Q	i	M	n
YDR448W	Nuclear	Nuclear		Q	o	-	n
YDR449C	-	Cytosolic and nuclear		Q	o	-	n
YDR450W	-	Cytosolic		Q	o	-	n
YDR451C	-	Nuclear		Q	o	-	n
YDR452W	-	Cytosolic		A	i21-40o	S	n
YDR453C	Cytosolic	Cytosolic		Q	o	-	n
YDR454C	-	Cytosolic and nuclear		Q	o	-	n
YDR455C	-	Cytosolic and nuclear		Q	o	-	n
YDR456W	Mito memb	Mito memb		S	o59-81i88-107o117-139i152-174o260-282i345-364o379-401i458-480o	S	n
YDR457W	Nuclear	Nuclear		Q	o	-	n
YDR458C	-	ER periphery		Q	o318-340i	-	n
YDR459C	-	ER memb		S	i13-35o55-77i177-199o214-236i	S	n
YDR460W	-	Cytosolic and nuclear		Q	o	-	n
YDR461W	-	PM periphery (inside cell)		Q	o	-	n
YDR462W	Mito lumen	Mito lumen		Q	o	-	n
YDR463W	Nuclear	Nuclear		Q	o	-	n
YDR464W	-	Cytosolic and nuclear		Q	o	-	n
YDR465C	-	Cytosolic and nuclear		Q	o	-	n
YDR466W	-	Cytosolic and nuclear		Q	o	-	n
YDR467C	-	Cytosolic and nuclear		Q	i30-52o	S	n
YDR468C	-	Golgi memb		Q	i206-223o	-	n
YDR469W	-	Cytosolic and nuclear		Q	o	-	n
YDR470C	-	PM		Q	i252-274o294-316i470-489o	-	n
YDR471W	-	Nuclear		Q	o	-	n
YDR472W	-	Golgi periphery		Q	o	-	n
YDR473C	Nuclear	Nuclear		Q	o	-	n
YDR474C	-	Mito lumen		Q	o	M	n
YDR475C	-	Cytosolic and nuclear		Q	o	-	n
YDR476C	-	Cytosolic and nuclear		Q	o	-	n
YDR477W	Cytosolic and nuclear	Cytosolic and nuclear		Q	o	M	n
YDR478W	-	Cytosolic and nuclear		Q	o	-	n
YDR479C	-	PM		Q	o146-165i172-194o265-284i291-308o	-	n
YDR480W	Nuclear	Nuclear		Q	o	-	n
YDR481C	-	Vacuole memb		A	i34-53o	-	n
YDR482C	-	Cytosolic and nuclear		Q	o	-	n
YDR483W	Golgi memb	Golgi periphery		A	o	S	n
YDR484W	-	Cytosolic and nuclear		Q	o	-	n
YDR485C	-	Cytosolic and nuclear		Q	o	-	n
YDR486C	-	Nuclear		Q	o	-	n
YDR487C	-	Cytosolic and nuclear		Q	o	-	n
YDR488C	-	Cytosolic and nuclear		Q	o	-	n
YDR489W	-	Cytosolic and nuclear		Q	o	-	n
YDR490C	-	Cytosolic and nuclear		Q	o	-	n
YDR491C	-	ER memb		A	o10-32i	S	n
YDR492W	-	Mito memb		Q	i88-110o120-142i155-177o181-203i216-235o250-267i	M	n
YDR493W	-	Mito lumen		Q	i	M	n
YDR494W	-	Mito lumen		Q	o	M	n
YDR495C	-	Cytosolic and nuclear		Q	o	-	n
YDR496C	-	Cytosolic and nuclear		Q	o	-	n
YDR497C	-	PM		Q	i85-107o130-152i159-178o183-205i218-240o244-266i335-357o372-394i403-425o445-467i480-502o507-529i	-	n
YDR498C	-	ER periphery		Q	o	-	n
YDR499W	-	Cytosolic		Q	o	-	n
YDR500C	-	Cytosolic and nuclear		Q	o	-	n
YDR501W	-	Nuclear		Q	o	-	n
YDR502C	-	Cytosolic and nuclear		Q	o	-	n
YDR503C	Golgi memb	ER memb		A	i17-39o118-140i214-231o236-255i	-	n
YDR504C	-	ER memb		A	i21-50o65-84i	S	n
YDR505C	-	Cytosolic and nuclear		Q	o	-	n
YDR506C	-	Secreted and PM periphery (outside cell)		S	o588-607i	S	y
YDR507C	-	PM periphery (inside cell)		Q	o	-	n
YDR508C	Mito memb	PM		Q	i184-206o226-248i260-282o297-316i382-404o432-454i482-501o511-533i554-576o591-608i	-	n
YDR509W	-	ER memb		A	o5-27i34-56o	S	n
YDR510W	-	Cytosolic and nuclear		Q	o	-	n
YDR511W	-	Mito lumen		Q	o	M	n
YDR512C	-	Cytosolic and nuclear		Q	o	-	n
YDR513W	Cytosolic	Mito lumen		A	i7-26o	S	n
YDR514C	-	Cytosolic and nuclear		Q	o	-	n
YDR515W	-	Cytosolic and nuclear		Q	o	-	n
YDR516C	-	Secreted and PM periphery (outside cell)		Q	o	-	y
YDR517W	-	Cytosolic and nuclear		Q	o	-	n
YDR518W	ER lumen	ER lumen		S	o	S	n
YDR519W	ER lumen	Secreted and PM periphery (outside cell)		S	o	S	n
YDR520C	-	Nuclear		Q	o	-	n
YDR521W	-	ER memb		S	i21-43o	S	n
YDR522C	-	Cytosolic and nuclear		Q	o	S	n
YDR523C	-	Cytosolic		Q	o	-	n
YDR524C	-	Cytosolic and nuclear		Q	o	-	n
YDR525W	-	Mito lumen		Q	o	M	n
YDR525W-A	-	ER memb		S	o5-22i31-53o	S	n
YDR526C	-	Cytosolic and nuclear		S	o20-42i55-74o78-100i	-	n
YDR527W	-	Cytosolic and nuclear		Q	o	-	n
YDR528W	-	Cytosolic and nuclear		Q	o	-	n
YDR529C	Mito lumen	Mito lumen		Q	o	-	n
YDR530C	-	Cytosolic and nuclear		Q	o	-	n
YDR531W	-	Cytosolic and nuclear		Q	o	-	n
YDR532C	-	Cytosolic and nuclear		Q	o	-	n
YDR533C	-	Cytosolic and nuclear		Q	o	-	n
YDR534C	-	Secreted and PM periphery (outside cell)		S	o	S	y
YDR535C	-	Mito lumen		Q	o	M	n
YDR536W	-	PM		A	i27-49o75-97i110-132o137-158i170-189o199-221i328-350o360-379i388-410o425-447i452-474o	M	n
YDR537C	-	Cytosolic and nuclear		Q	o	-	n
YDR538W	Cytosolic	Cytosolic and nuclear		Q	o	M	n
YDR539W	-	Cytosolic and nuclear		Q	o	-	n
YDR540C	-	Cytosolic and nuclear		Q	i	-	n
YDR541C	-	Secreted and PM periphery (outside cell)		S	o	S	n
YDR542W	-	PM periphery (inside cell)		S	o	S	n
YDR543C	-	Cytosolic and nuclear		Q	o	-	n
YDR544C	-	Cytosolic and nuclear		Q	o	-	n
YDR545W	-	Nuclear		Q	o	-	n
YEL001C	-	ER memb		S	o177-196i	S	n
YEL002C	ER memb	ER memb		S	o393-415i	S	n
YEL003W	-	Nuclear		S	i5-22o	S	n
YEL004W	-	Golgi memb		S	i70-87o97-119i126-144o169-191i279-301o306-328i	S	n
YEL005C	-	Cytosolic		Q	o	-	n
YEL006W	-	Mito memb		Q	i40-62o103-122i197-219o	-	n
YEL007W	-	Cytosolic and nuclear		Q	o	-	n
YEL008W	-	Mito lumen		Q	o	M	n
YEL009C	Nuclear	Nuclear		Q	o	-	n
YEL010W	-	ER periphery		Q	i95-114o	-	n
YEL011W	-	Cytosolic and nuclear		Q	o	-	n
YEL012W	-	Cytosolic and nuclear		Q	o	-	n
YEL013W	-	Cytosolic		Q	o	-	n
YEL014C	-	Cytosolic and nuclear		Q	o	-	n
YEL015W	-	Cytosolic and nuclear		Q	o	-	n
YEL016C	-	Cytosolic and nuclear		Q	o	-	n
YEL017C-A	-	ER memb		A	o10-29i	S	n
YEL017W	-	PM		Q	o241-263i314-336o	-	n
YEL018W	-	Cytosolic and nuclear		Q	o	-	n
YEL019C	-	Cytosolic and nuclear		Q	o	-	n
YEL020C	-	Cytosolic and nuclear		Q	o	-	n
YEL020W-A	Mito lumen	Mito lumen		Q	o	-	n
YEL021W	-	Cytosolic and nuclear		Q	o	-	n
YEL022W	-	Cytosolic		Q	o	-	n
YEL023C	-	Cytosolic and nuclear		Q	o	-	n
YEL024W	-	Mito lumen		Q	o	M	n
YEL025C	-	Golgi memb		Q	i72-94o	-	n
YEL026W	-	Cytosolic and nuclear		Q	o	-	n
YEL027W	vacuole memb	Vacuole memb		S	i7-29o54-76i89-111o126-148i	S	n
YEL028W	-	ER lumen		S	i7-29o	S	n
YEL029C	Cytosolic and nuclear	Cytosolic and nuclear		Q	o	-	n
YEL030W	Mito lumen	Mito lumen		Q	o	M	n
YEL031W	-	Vacuole memb		Q	i22-44o59-81i197-214o218-237i400-419o992-1014i1021-1038o1053-1075i1136-1155o1175-1197i	S	n
YEL032W	Nuclear	Nuclear		Q	o	-	n
YEL033W	-	ER memb		A	o15-33i40-62o	S	n
YEL034W	-	Cytosolic		Q	o	-	n
YEL035C	-	Cytosolic and nuclear		Q	o	-	n
YEL036C	-	Golgi memb		S	i21-43o	S	n
YEL037C	-	Cytosolic		Q	o	-	n
YEL038W	-	PM periphery (inside cell)		Q	o	-	n
YEL039C	Mito lumen	Mito lumen		Q	o	-	n
YEL040W	-	ER lumen		S	o	S	y
YEL041W	-	Cytosolic and nuclear		Q	o	-	n
YEL042W	Golgi memb	Golgi periphery		A	i7-24o	S	n
YEL043W	-	Nuclear		S	o	S	n
YEL044W	-	Cytosolic and nuclear		Q	o	-	n
YEL045C	-	Cytosolic and nuclear		S	i42-64o74-96i116-135o	M	n
YEL046C	-	Cytosolic and nuclear		Q	o	-	n
YEL047C	-	Mito lumen		S	o	S	n
YEL048C	-	Golgi periphery		Q	o	-	n
YEL049W	-	PM periphery (inside cell)		S	o	S	n
YEL050C	Mito lumen	Mito lumen		S	o	M	n
YEL051W	-	Cytosolic		Q	o	-	n
YEL052W	-	Mito lumen		Q	o	M	n
YEL053C	-	Cytosolic and nuclear		Q	o	-	n
YEL054C	-	Mito lumen		Q	o	-	n
YEL055C	-	Cytosolic and nuclear		Q	o	-	n
YEL056W	-	Cytosolic and nuclear		Q	o	-	n
YEL057C	-	Cytosolic and nuclear		Q	o	-	n
YEL058W	-	Cytosolic		Q	o	-	n
YEL059C-A	-	Cytosolic and nuclear		Q	i	-	n
YEL059W	-	ER memb		A	o15-37i66-88o	S	n
YEL060C	Vacuole lumen	Vacuole lumen		S	o	S	n
YEL061C	-	Nuclear		Q	o	-	n
YEL062W	-	Mito lumen		Q	o	M	n
YEL063C	-	PM		Q	i93-115o170-192i199-218o238-260i324-346o377-399i420-442o452-474i494-516o526-548i	-	n
YEL064C	vacuole memb	Vacuole memb		Q	i73-92o102-124i144-166o186-205i217-239o259-281i294-316o336-358i388-410o414-433i445-467o	-	n
YEL065W	vacuole memb	PM		Q	i68-90o105-127i132-152o162-184i191-213o228-250i285-307o317-335i355-372o392-414i421-440o445-467i487-509o560-579i	-	n
YEL066W	Cytosolic and nuclear	Nuclear		Q	o	-	n
YEL067C	-	Cytosolic and nuclear		Q	o	-	n
YEL068C	-	Secreted and PM periphery (outside cell)		S	o	S	n
YEL069C	-	PM		Q	i51-73o108-130i137-154o169-188i195-217o227-249i318-340o355-374i383-402o422-444i457-479o483-505i	-	n
YEL070W	-	Mito lumen		Q	o	-	n
YEL071W	Cytosolic	Cytosolic		Q	o	-	n
YEL072W	-	Cytosolic and nuclear		Q	o	-	n
YEL073C	-	Secreted and PM periphery (outside cell)		S	o	S	y
YEL074W	-	Cytosolic and nuclear		Q	o	-	n
YEL075C	-	Cytosolic and nuclear		Q	o	-	n
YEL075W-A	-	Mito lumen		Q	o	M	n
YEL076C	-	Cytosolic and nuclear		Q	o	-	n
YEL076C-A	-	Cytosolic and nuclear		Q	o	-	n
YEL077C	-	Nuclear		Q	o	-	n
YER001W	-	ER memb		A	i13-35o	S	n
YER002W	-	Nuclear		Q	i	-	n
YER003C	Cytosolic	Cytosolic and nuclear		Q	o	-	n
YER004W	-	Mito lumen		S	o	M	n
YER005W	Golgi periphery	Golgi memb		Q	o501-518i	-	n
YER006W	Nuclear	Nuclear		Q	o	-	n
YER007C-A	-	Cytosolic and nuclear		Q	o	-	n
YER007W	-	Cytosolic and nuclear		Q	o	-	n
YER008C	-	Mito lumen		Q	o	M	n
YER009W	Cytosolic	Cytosolic and nuclear		Q	o	-	n
YER010C	-	Cytosolic and nuclear		Q	o	-	n
YER011W	-	Secreted and PM periphery (outside cell)		S	o	S	y
YER012W	-	ER periphery		Q	o	-	n
YER013W	Nuclear	Nuclear		Q	o	-	n
YER014C-A	-	Mito lumen		Q	o	M	n
YER014W	Mito periphery	Mito lumen		A	o	M	n
YER015W	Cytosolic	Cytosolic and nuclear		Q	o	-	n
YER016W	-	Nuclear		Q	o	-	n
YER017C	Mito memb	Mito memb		Q	i223-245o	M	n
YER018C	-	Nuclear		Q	o	-	n
YER019C-A	-	Mito memb		Q	o59-81i	M	n
YER019W	-	PM		Q	i393-415o425-447i	-	n
YER020W	-	Cytosolic		Q	o	-	n
YER021W	-	ER periphery		Q	o	-	n
YER022W	-	Cytosolic and nuclear		Q	o	-	n
YER023W	-	Secreted and PM periphery (outside cell)		S	o	S	n
YER024W	-	Peroxisome lumen		Q	o	-	n
YER025W	-	Cytosolic		Q	o	-	n
YER026C	Mito memb	Mito memb		Q	i85-107o161-183i	-	n
YER027C	-	Nuclear		Q	o	-	n
YER028C	-	Nuclear		Q	o	-	n
YER029C	Nuclear	Nuclear		Q	o	-	n
YER030W	-	Cytosolic and nuclear		Q	o	-	n
YER031C	-	Cytosolic		Q	o	-	n
YER032W	-	Cytosolic and nuclear		Q	o	-	n
YER033C	-	Cytosolic and nuclear		Q	o	-	n
YER034W	-	Cytosolic and nuclear		Q	o	-	n
YER035W	-	Cytosolic and nuclear		Q	o	-	n
YER036C	-	Cytosolic and nuclear		Q	o	-	n
YER037W	-	Cytosolic		Q	o	-	n
YER038C	-	Cytosolic		Q	o	-	n
YER039C	-	ER memb		Q	i13-35o85-107i124-143o158-180i187-209o213-232i	S	n
YER039C-A	-	Golgi memb		Q	i13-32o47-69i	-	n
YER040W	Nuclear	Nuclear		Q	o	-	n
YER041W	-	Nuclear		Q	o	-	n
YER042W	-	Cytosolic and nuclear		Q	o	-	n
YER043C	-	Cytosolic and nuclear		Q	o	-	n
YER044C	-	PM		Q	i21-43o91-113i	-	n
YER044C-A	-	Cytosolic and nuclear		Q	o	-	n
YER045C	-	Cytosolic and nuclear		Q	o	-	n
YER046W	-	Cytosolic and nuclear		Q	o	-	n
YER047C	-	Cytosolic and nuclear		Q	o	M	n
YER048C	-	Cytosolic and nuclear		Q	o	-	n
YER048W-A	-	Mito lumen		Q	o	M	n
YER049W	-	Cytosolic and nuclear		Q	o	-	n
YER050C	-	Cytosolic and nuclear		Q	o	-	n
YER051W	-	Nuclear		Q	o	-	n
YER052C	-	Cytosolic		Q	o	-	n
YER053C	Mito memb	Mito memb		Q	i264-286o	-	y
YER053C-A	-	ER memb		A	o4-21i	S	n
YER054C	-	Cytosolic		Q	o	-	n
YER055C	-	ER periphery		Q	o	-	n
YER056C	-	PM		Q	i94-116o121-143i164-186o201-223i230-249o259-281i302-324o344-366i371-390o400-422i429-448o463-485i	-	n
YER056C-A	-	Cytosolic and nuclear		Q	i	-	n
YER057C	Cytosolic and nuclear	Cytosolic and nuclear		S	o	-	y
YER058W	-	ER lumen		S	i7-26o	S	n
YER059W	-	Nuclear		Q	o	-	n
YER060W	-	PM		Q	i87-109o119-141i154-176o196-218i225-242o257-279i300-322o393-415i424-443o458-480i	-	n
YER060W-A	-	PM		Q	i87-109o119-141i162-184o199-221i228-246o256-278i299-321o341-363i368-387o397-419i426-445o460-482i	-	n
YER061C	-	Peroxisome lumen		S	o	M	n
YER062C	Cytosolic	Cytosolic		Q	o	-	n
YER063W	-	Nuclear		Q	o	-	n
YER064C	-	Cytosolic and nuclear		Q	o	-	n
YER065C	Peroxisome lumen	Peroxisome lumen		Q	o	-	n
YER066C-A	-	Cytosolic and nuclear		Q	o	-	n
YER066W	-	Cytosolic and nuclear		Q	o	-	n
YER067W	-	Cytosolic and nuclear		Q	i	-	n
YER068W	Nuclear	Nuclear		Q	o	-	n
YER069W	Mito lumen	Mito lumen		Q	o	M	n
YER070W	-	Nuclear		Q	o	-	n
YER071C	-	Cytosolic and nuclear		Q	o	-	n
YER072W	-	PM		A	o32-54i61-83o98-120i	M	n
YER073W	-	Mito lumen		Q	o	M	n
YER074W	-	Mito lumen		Q	i	M	n
YER074W-A	-	Secreted and PM periphery (outside cell)		S	o4-23i	S	y
YER075C	-	Cytosolic and nuclear		Q	o	-	n
YER076C	-	Secreted and PM periphery (outside cell)		S	o	S	n
YER077C	-	Mito lumen		Q	o	M	n
YER078C	-	Mito lumen		Q	o	M	n
YER079W	-	Cytosolic		Q	o	-	n
YER080W	-	Cytosolic and nuclear		Q	o	M	n
YER081W	-	Mito lumen		Q	o	-	n
YER082C	-	Cytosolic		Q	o	-	n
YER083C	-	ER memb		Q	i173-192o219-238i284-306o	S	n
YER084W	-	Cytosolic and nuclear		Q	o	S	n
YER085C	-	Cytosolic and nuclear		Q	o	-	n
YER086W	Mito lumen	Mito lumen		Q	o	M	n
YER087C-B	-	ER memb		A	o55-74i	-	n
YER087W	-	Mito lumen		Q	o	M	n
YER088C	-	Nuclear		Q	o	-	n
YER089C	-	Cytosolic		Q	o	-	n
YER090W	-	Cytosolic and nuclear		Q	o	-	n
YER091C	-	Cytosolic and nuclear		Q	o	-	n
YER091C-A	-	Cytosolic and nuclear		Q	o	-	n
YER092W	-	Nuclear		Q	o	-	n
YER093C	-	Cytosolic and nuclear		Q	o	M	n
YER093C-A	-	PM		Q	i20-37o66-88i	-	n
YER094C	-	ER periphery		Q	o	-	n
YER095W	-	Cytosolic and nuclear		Q	o	-	n
YER096W	-	Cytosolic and nuclear		Q	o	-	n
YER097W	-	Mito lumen		Q	o	M	n
YER098W	-	Cytosolic and nuclear		Q	o	-	n
YER099C	-	Cytosolic		Q	o	-	n
YER100W	ER periphery	Cytosolic		Q	i231-249o	-	n
YER101C	-	Cytosolic		Q	o	-	n
YER102W	-	Cytosolic and nuclear		Q	o	-	n
YER103W	Cytosolic	Cytosolic		Q	o	-	n
YER104W	-	Cytosolic and nuclear		Q	o	-	n
YER105C	Cytosolic and nuclear	Cytosolic and nuclear		Q	o	-	n
YER106W	-	Cytosolic and nuclear		Q	o	-	n
YER107C	Cytosolic and nuclear	Cytosolic and nuclear		Q	o	-	n
YER109C	Nuclear	Nuclear		Q	o	-	n
YER110C	Cytosolic and nuclear	Cytosolic		Q	o	-	n
YER111C	-	Cytosolic and nuclear		Q	o	-	n
YER112W	Nuclear	Nuclear		Q	o	-	n
YER113C	-	ER memb		A	i7-26o291-313i371-393o406-428i457-479o494-516i553-575o595-617i638-660o675-697i	S	n
YER114C	-	Cytosolic		Q	o	-	n
YER115C	-	Cytosolic and nuclear		Q	o	-	n
YER116C	-	Cytosolic and nuclear		Q	o	-	n
YER117W	-	Mito lumen		Q	o	-	n
YER118C	-	Cytosolic		A	i33-55o65-84i91-108o123-145i	-	n
YER119C	vacuole memb	Vacuole memb		S	i5-27o31-53i81-103o118-140i147-169o195-217i230-252o262-284i358-380o384-406i426-445o	S	y
YER119C-A	-	Cytosolic and nuclear		Q	o	-	n
YER120W	ER memb	ER memb		Q	o226-243i	-	n
YER121W	-	Cytosolic and nuclear		Q	o	-	n
YER122C	-	Cytosolic		Q	o	-	n
YER123W	-	Cytosolic		Q	o	-	n
YER124C	-	Cytosolic and nuclear		Q	o	-	n
YER125W	-	Cytosolic		Q	o	-	n
YER126C	-	Nuclear		Q	o	-	n
YER127W	Nuclear	Nuclear		Q	o	-	n
YER128W	-	Cytosolic and nuclear		Q	o	-	n
YER129W	-	Cytosolic		Q	i356-378o	-	n
YER130C	-	Nuclear		Q	o	-	n
YER131W	-	Mito lumen		Q	i	-	n
YER132C	Cytosolic	Cytosolic		Q	o	-	n
YER133W	Cytosolic	Cytosolic and nuclear		Q	o	-	n
YER134C	-	Cytosolic and nuclear		Q	o	-	n
YER135C	-	Cytosolic and nuclear		Q	o15-37i	S	n
YER136W	-	Cytosolic		Q	o	-	n
YER137C	-	Cytosolic and nuclear		Q	o	-	n
YER137C-A	-	Cytosolic and nuclear		Q	o	-	n
YER138C	-	Cytosolic and nuclear		Q	o	-	n
YER138W-A	-	Cytosolic and nuclear		Q	o	-	n
YER139C	-	Nuclear		Q	o	-	n
YER140W	-	PM		Q	o89-111i223-245o329-351i392-411o426-448i	-	n
YER141W	Mito memb	Mito memb		Q	i85-107o167-189i201-219o242-264i298-320o365-387i400-422o427-449i	M	n
YER142C	Nuclear	Nuclear		Q	o	-	n
YER143W	-	Cytosolic		Q	o	-	n
YER144C	-	Secreted and PM periphery (outside cell)		Q	o	-	y
YER145C	-	Vacuole memb		A	o10-32i51-73o88-110i149-171o181-203i210-232o292-314i	S	n
YER146W	Nuclear	Nuclear		Q	o	-	n
YER147C	Nuclear	Cytosolic and nuclear		Q	o	-	n
YER148W	Nuclear	Nuclear		Q	o	-	n
YER149C	-	Cytosolic and nuclear		Q	o	-	n
YER150W	-	Cytosolic		S	o	S	y
YER151C	-	Cytosolic and nuclear		Q	o	-	n
YER152C	-	Cytosolic and nuclear		Q	o	-	n
YER153C	Mito lumen	Mito lumen		Q	o	M	n
YER154W	Mito memb	Mito memb		Q	o282-304i	M	n
YER155C	-	Cytosolic		Q	o	M	n
YER156C	-	Cytosolic and nuclear		Q	o	-	n
YER157W	Golgi periphery	Golgi periphery		Q	o	-	n
YER158C	-	Mito lumen		Q	o	M	n
YER159C	-	Nuclear		Q	o	-	n
YER159C-A	-	Cytosolic and nuclear		Q	o	-	n
YER160C	-	Cytosolic and nuclear		Q	o	-	n
YER161C	Nuclear	Nuclear		Q	o	M	n
YER162C	Nuclear	Nuclear		Q	o	-	n
YER163C	-	Cytosolic and nuclear		Q	o	-	n
YER164W	-	Cytosolic and nuclear		Q	o	-	n
YER165W	Cytosolic and nuclear	Cytosolic and nuclear		Q	o	-	n
YER166W	-	PM		Q	o222-256i553-575o599-621i1191-1208o1218-1240i1270-1292o1307-1329i1336-1355o1370-1392i	-	n
YER167W	-	Nuclear		Q	o	M	n
YER168C	-	Mito lumen		Q	o	M	n
YER169W	Nuclear	Nuclear		Q	o	-	n
YER170W	Mito lumen	Cytosolic and nuclear		Q	o	-	n
YER171W	Nuclear	Nuclear		Q	o	-	n
YER172C	-	Cytosolic and nuclear		Q	o	-	n
YER173W	-	Cytosolic		Q	o	-	n
YER174C	-	Cytosolic and nuclear		Q	o	-	n
YER175C	-	Cytosolic and nuclear		Q	o	-	n
YER176W	-	Nuclear		Q	o	-	n
YER177W	-	Cytosolic and nuclear		Q	o	-	n
YER178W	Mito lumen	Golgi periphery		Q	o	-	n
YER179W	Nuclear	Cytosolic		Q	o	-	n
YER180C	-	Cytosolic and nuclear		Q	o	-	n
YER181C	-	ER memb		S	i13-35o55-77i	S	n
YER182W	-	Mito memb		Q	i29-51o	M	n
YER183C	-	Cytosolic and nuclear		Q	o	-	n
YER184C	-	Nuclear		Q	o436-458i580-602o	-	n
YER185W	-	ER memb		A	o20-42i78-97o112-134i147-169o184-206i227-246o266-288i	S	n
YER186C	-	Cytosolic and nuclear		Q	o	-	n
YER187W	-	Cytosolic and nuclear		Q	o	-	n
YER187W-A	-	Secreted and PM periphery (outside cell)		S	i5-27o47-81i	S	y
YER188W	-	Secreted and PM periphery (outside cell)		S	o	S	n
YER189W	-	Cytosolic and nuclear		Q	o	-	n
YER190W	-	Nuclear		Q	o	-	n
YFL001W	Nuclear	Nuclear		Q	o	M	n
YFL002C	-	Nuclear		Q	o	-	n
YFL002W-A	-	Cytosolic and nuclear		Q	o	-	n
YFL002W-B	-	Cytosolic and nuclear		Q	o	-	n
YFL003C	-	Cytosolic and nuclear		Q	o	-	n
YFL004W	-	PM		Q	o694-716i723-745o765-787i	-	n
YFL005W	Plasma memb periphery (cytosolic side)	Cytosolic		Q	o	-	n
YFL006W	-	Cytosolic and nuclear		Q	o	S	n
YFL007W	-	Cytosolic		Q	o	-	n
YFL008W	Nuclear	Nuclear		Q	o	-	n
YFL009W	-	Cytosolic and nuclear		Q	o	-	n
YFL010C	-	Nuclear		Q	o	-	n
YFL010W-A	-	Cytosolic and nuclear		Q	o	-	n
YFL011W	-	Mito memb		A	o43-65i99-118o128-147i154-176o191-208i221-240o343-365i374-393o413-435i448-470o474-496i	-	n
YFL012W	-	Mito lumen		Q	o	M	n
YFL012W-A	-	Cytosolic and nuclear		Q	o	S	n
YFL013C	Nuclear	Nuclear		Q	o	-	n
YFL014W	-	Cytosolic and nuclear		Q	o	-	n
YFL015C	-	ER memb		S	i12-34o54-71i	S	n
YFL016C	Mito lumen	Mito lumen		Q	o	M	n
YFL017C	-	Cytosolic and nuclear		Q	o	-	n
YFL017W-A	Nuclear	Nuclear		Q	o	-	n
YFL018C	Mito lumen	Mito lumen		Q	o	M	n
YFL019C	-	Cytosolic and nuclear		Q	o	-	n
YFL020C	-	PM periphery (inside cell)		S	o	S	n
YFL021W	-	Cytosolic and nuclear		S	o	S	n
YFL022C	Cytosolic	Cytosolic		Q	o	-	n
YFL023W	-	Nuclear		Q	o	-	n
YFL024C	-	Nuclear		Q	o	-	n
YFL025C	-	Mito memb		Q	i52-74o708-730i751-773o804-838i870-892o921-943i956-973o988-1010i	M	n
YFL026W	-	PM		Q	o51-73i80-102o133-155i162-184o209-231i244-266o276-298i	-	n
YFL027C	-	Golgi periphery		Q	o	-	n
YFL028C	-	Cytosolic		Q	o	-	n
YFL029C	-	Cytosolic and nuclear		Q	o	-	n
YFL030W	-	Mito lumen		Q	o	-	n
YFL031W	-	Nuclear		Q	o	-	n
YFL032W	-	Mito memb		Q	i21-43o58-80i	M	n
YFL033C	-	Nuclear		Q	o	-	n
YFL034C-A	-	Cytosolic and nuclear		Q	i	-	n
YFL034C-B	-	Mito lumen		Q	o	M	n
YFL034W	-	PM		Q	o294-316i543-565o585-607i818-840o	-	n
YFL035C	-	Mito lumen		Q	o	M	n
YFL036W	Mito lumen	Mito lumen		Q	o	M	n
YFL037W	-	Nuclear		Q	o	-	n
YFL038C	-	Golgi periphery		Q	o	-	n
YFL039C	Cytosolic	Cytosolic		Q	o	-	n
YFL040W	-	PM		S	i28-50o65-87i100-119o129-146i158-180o185-207i276-298o313-334i341-362o387-409i422-444o454-476i	S	n
YFL041W	-	Secreted and PM periphery (outside cell)		S	o	S	n
YFL042C	-	ER periphery		Q	o636-658i	-	n
YFL044C	-	Nuclear		Q	o	-	n
YFL045C	Cytosolic	Cytosolic		Q	o	-	n
YFL046W	-	Mito memb		Q	o184-206i	M	n
YFL047W	-	Cytosolic and nuclear		Q	o	-	n
YFL048C	Golgi memb	Golgi memb		S	o414-433i	S	n
YFL049W	-	Cytosolic and nuclear		Q	o	-	n
YFL050C	-	PM		Q	o743-765i772-794o	-	n
YFL051C	-	ER memb		S	i7-29o133-155i	S	n
YFL052W	-	Nuclear		Q	o	-	n
YFL053W	-	Cytosolic and nuclear		Q	o	-	n
YFL054C	-	PM		Q	i351-373o383-405i426-448o483-502i515-537o563-585i	-	n
YFL055W	-	PM		Q	i57-79o83-105i125-147o167-189i194-216o241-263i284-301o330-352i377-399o404-426i447-469o484-506i	-	n
YFL056C	-	Cytosolic		Q	o	-	n
YFL057C	-	Cytosolic		Q	o	-	n
YFL058W	-	Cytosolic and nuclear		Q	o	-	n
YFL059W	-	Cytosolic		Q	o	-	n
YFL060C	-	Secreted and PM periphery (outside cell)		S	o	S	n
YFL061W	-	Cytosolic and nuclear		Q	o	-	n
YFL062W	-	ER memb		Q	i46-63o69-91i233-255o259-281i	-	n
YFL063W	-	Cytosolic and nuclear		Q	o	S	n
YFL064C	-	Cytosolic and nuclear		Q	o	-	n
YFL065C	-	Mito lumen		Q	o	M	n
YFL066C	-	Nuclear		Q	o	-	n
YFL067W	-	Secreted and PM periphery (outside cell)		S	o4-26i152-171o	S	y
YFL068W	-	Mito memb		A	i136-158o	M	n
YFR001W	-	Nuclear		Q	o	M	n
YFR002W	Cytosolic and nuclear	Cytosolic and nuclear		Q	o	-	n
YFR003C	-	Cytosolic and nuclear		Q	o	-	n
YFR004W	-	ER periphery		Q	o	-	n
YFR005C	-	Cytosolic and nuclear		Q	o	-	n
YFR006W	-	ER memb		A	i7-24o	S	n
YFR007W	-	Cytosolic and nuclear		Q	o	-	n
YFR008W	-	Cytosolic and nuclear		Q	o	-	n
YFR009W	-	ER periphery		Q	o	-	n
YFR010W	-	Nuclear		Q	o	-	n
YFR011C	-	Nuclear		Q	o	-	n
YFR012W	-	ER memb		S	o15-37i96-118o133-155i168-190o	S	n
YFR012W-A	-	Cytosolic and nuclear		Q	i	-	n
YFR013W	-	Nuclear		Q	o	-	n
YFR014C	-	Cytosolic and nuclear		Q	o	-	n
YFR015C	-	Cytosolic and nuclear		Q	o	-	n
YFR016C	-	Nuclear		Q	o	-	n
YFR017C	-	Cytosolic and nuclear		Q	o	-	n
YFR018C	-	Secreted and PM periphery (outside cell)		S	o	S	n
YFR019W	-	Cytosolic		Q	o	-	n
YFR020W	-	Secreted and PM periphery (outside cell)		S	o	S	n
YFR021W	-	Nuclear		Q	o	-	n
YFR022W	-	Cytosolic		Q	o	-	n
YFR023W	-	Cytosolic and nuclear		Q	o	-	n
YFR024C	-	Cytosolic		Q	o	-	n
YFR024C-A	-	Cytosolic		Q	o	-	n
YFR025C	-	Cytosolic and nuclear		Q	o	-	n
YFR026C	-	ER lumen		S	o5-27i	S	n
YFR027W	Nuclear	Nuclear		Q	o	-	n
YFR028C	Cytosolic and nuclear	Cytosolic and nuclear		Q	o	-	n
YFR029W	-	Cytosolic and nuclear		Q	o	-	n
YFR030W	-	ER periphery		Q	o	-	n
YFR031C	-	Nuclear		Q	o	-	n
YFR031C-A	-	Nuclear		Q	o	M	n
YFR032C	-	Nuclear		Q	o	-	n
YFR032C-A	-	Nuclear		Q	i	-	n
YFR033C	-	Cytosolic and nuclear		Q	o	-	n
YFR034C	Nuclear	Nuclear		Q	o	-	n
YFR035C	-	PM		Q	o60-82i89-111o	-	n
YFR036W	Nuclear	Nuclear		Q	o	-	n
YFR037C	Nuclear	Nuclear		Q	o	-	n
YFR038W	-	Nuclear		Q	o	-	n
YFR039C	-	Secreted and PM periphery (outside cell)		S	o	S	n
YFR040W	-	Cytosolic		Q	o	-	n
YFR041C	-	ER memb		S	i7-29o132-154i	S	n
YFR042W	-	ER memb		S	i13-35o45-67i140-162o177-194i	S	y
YFR043C	-	Cytosolic		Q	o	-	n
YFR044C	-	Golgi periphery		Q	o	-	n
YFR045W	-	Cytosolic		Q	o	-	n
YFR046C	-	Cytosolic and nuclear		Q	o	-	n
YFR047C	Cytosolic and nuclear	Cytosolic and nuclear		Q	o	-	n
YFR048W	-	Cytosolic		Q	o632-654i	-	n
YFR049W	Mito lumen	Mito lumen		Q	o	-	n
YFR050C	-	ER periphery		Q	o	-	n
YFR051C	-	Golgi periphery		Q	o	M	n
YFR052W	-	Cytosolic		Q	o	-	n
YFR053C	-	Cytosolic and nuclear		Q	o	-	n
YFR054C	-	Cytosolic and nuclear		Q	o	-	n
YFR055W	-	Cytosolic and nuclear		Q	o	-	n
YFR056C	-	PM		Q	i40-57o72-89i	-	n
YFR057W	-	Cytosolic and nuclear		Q	o	-	n
YGL001C	-	ER periphery		Q	o	S	n
YGL002W	-	ER memb		S	o5-27i184-203o	S	n
YGL003C	Cytosolic and nuclear	Cytosolic and nuclear		Q	o	-	n
YGL004C	-	Cytosolic		Q	o	-	n
YGL005C	-	Cytosolic and nuclear		Q	o	-	n
YGL006W	vacuole memb	PM		Q	i119-137o152-174i344-366o394-416i899-921o926-948i969-991o1066-1088i1100-1119o	-	n
YGL007W	-	ER periphery		Q	i60-79o	-	n
YGL008C	Plasma memb	PM		Q	i112-134o138-160i289-311o331-353i691-713o719-738i751-773o788-810i823-845o855-874i	-	n
YGL009C	-	Mito lumen		Q	o	-	n
YGL010W	-	ER memb		A	i24-46o66-88i101-118o128-150i	-	n
YGL011C	-	ER periphery		Q	o	-	n
YGL012W	-	PM		Q	o40-62i102-124o144-163i175-197o298-320i327-346o424-443i	-	n
YGL013C	Nuclear	Nuclear		Q	o	-	n
YGL014W	-	Cytosolic and nuclear		Q	o	-	n
YGL015C	-	Cytosolic and nuclear		Q	o	-	n
YGL016W	-	Cytosolic and nuclear		Q	o	-	n
YGL017W	Cytosolic	Cytosolic		Q	o	-	n
YGL018C	-	Mito lumen		Q	o	M	n
YGL019W	-	Nuclear		Q	o	-	n
YGL020C	-	Secreted and PM periphery (outside cell)		S	o	S	n
YGL021W	-	Cytosolic and nuclear		Q	o	S	n
YGL022W	-	ER memb		S	i7-29o79-101i114-131o141-163i170-192o207-229i236-258o268-287i300-322o357-379i386-403o407-429i442-464o	S	n
YGL023C	-	Cytosolic		Q	o	-	n
YGL024W	-	Cytosolic and nuclear		A	i20-42o88-110i	M	n
YGL025C	-	Cytosolic and nuclear		Q	o	-	n
YGL026C	-	Cytosolic		Q	o	-	n
[truncated: 4,364 more rows]
